# Supplementary material for: NH-type of chiral Ni(ii) complexes of glycine Schiff base: design, structural evaluation, reactivity and synthetic applications
Source: Royal Society of Chemistry journal article supplement (doi:10.1039/c3ob41959b), 2013-12-10

## Supporting Information

# NH-Type of chiral Ni(II) complexes of glycine Schiff base: design, structural evaluation, reactivity and synthetic applications

Mackenzie Bergagnini,<sup>a</sup> Kazunobu Fukushi,<sup>b</sup> Jianlin Han,<sup>c</sup> Norio Shibata,<sup>b</sup> Christian Roussel,<sup>d</sup> Trevor K. Ellis,<sup>a</sup> José Luis Aceña<sup>e</sup> and Vadim A. Soloshonok<sup>\*,e,f</sup>

<sup>a</sup> Department of Chemistry and Physics, 100 Campus Drive, Weatherford, OK 73096-3098, United States

<sup>b</sup> Department of Frontier Materials, Graduate School of Engineering, Nagoya Institute of Technology, Gokiso, Showa-ku, Nagoya 466-8555, Japan

<sup>c</sup> School of Chemistry and Chemical Engineering, Nanjing University, Nanjing, 210093, China

<sup>d</sup> Chirosciences, ISM2 UMR7313, Aix-Marseille University, France

<sup>e</sup> Department of Organic Chemistry I, Faculty of Chemistry, University of the Basque Country UPV/EHU, 20018 San Sebastián, Spain. Fax: +34 943-015270; Tel: +34 943-015177; E-mail: vadym.soloshonok@ehu.es

<sup>f</sup> IKERBASQUE, Basque Foundation for Science, 48011 Bilbao, Spain

## Table of Contents

|                                                     |    |
|-----------------------------------------------------|----|
| Figure 1. Thermal Ellipsoid Plot of Structure ..... | 2  |
| Figure 2. Packing Diagram .....                     | 3  |
| Comments .....                                      | 4  |
| Experimental .....                                  | 4  |
| Acknowledgements .....                              | 5  |
| References .....                                    | 5  |
| Table 1. Crystal Data .....                         | 6  |
| Table 2. Atom Coordinates .....                     | 7  |
| Table 3. Bond Distances and Angles .....            | 8  |
| Table 4. Anisotropic Displacement Parameters .....  | 11 |
| Table 5. Hydrogen Atom Parameters .....             | 12 |
| Table 6. Torsion Angles .....                       | 13 |
| NMR spectra .....                                   | 15 |

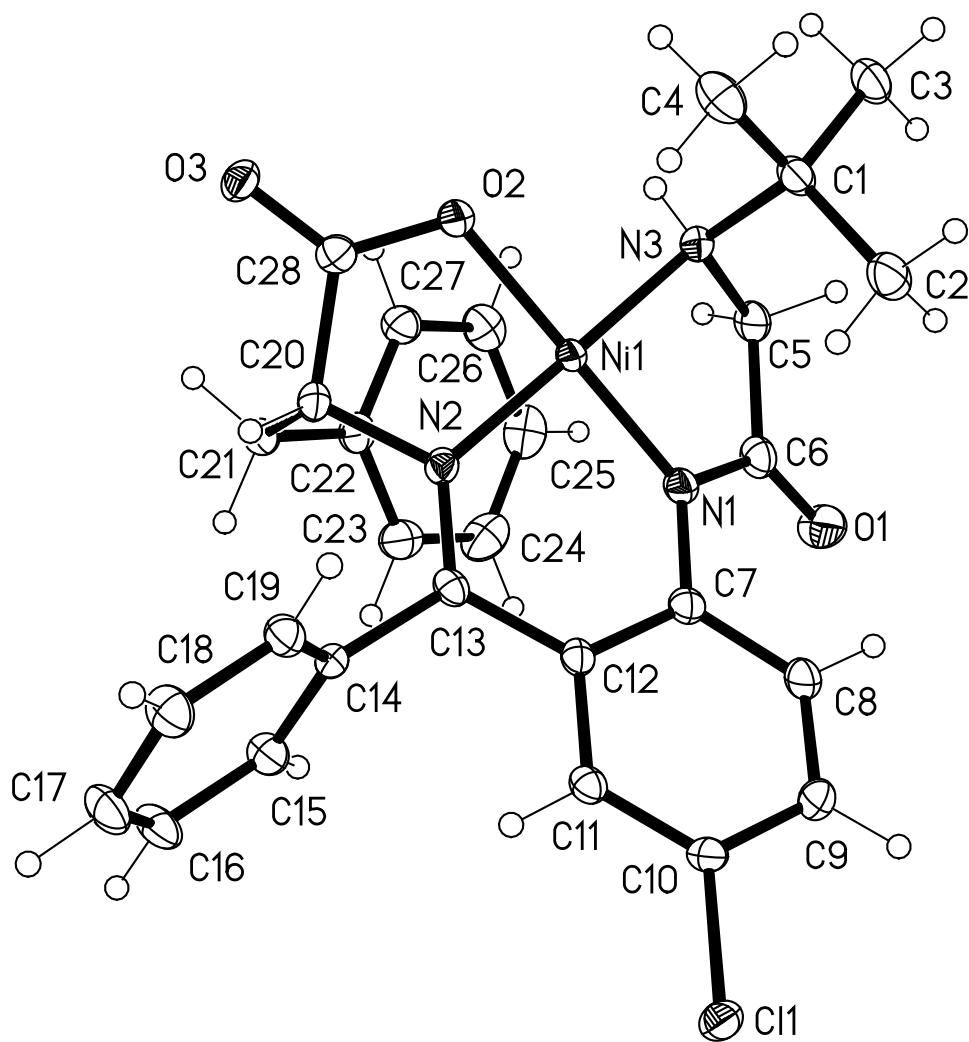

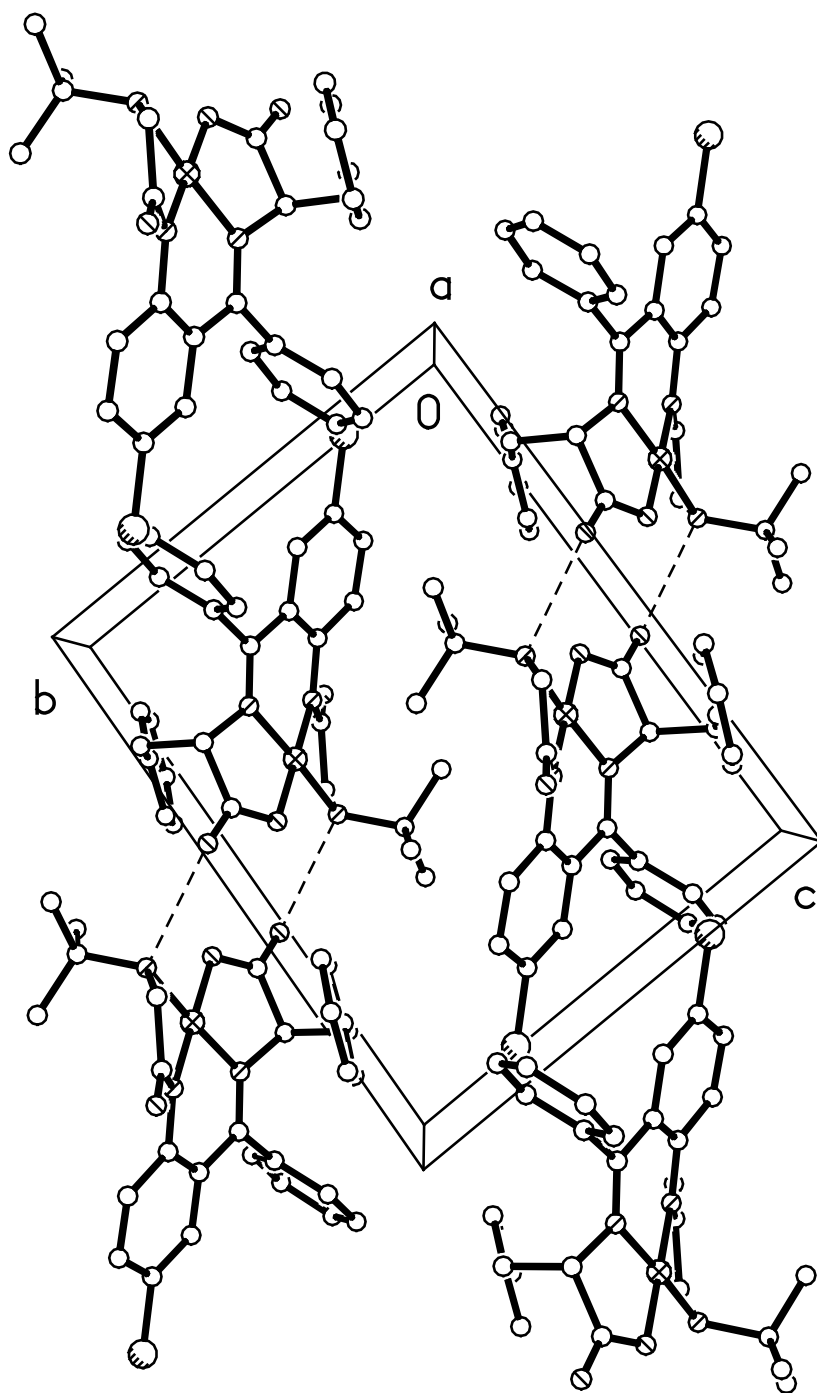

## Comment

The displacement ellipsoids were drawn at the 50% probability level.

## Experimental

A red prism-shaped crystal of dimensions 0.47 x 0.15 x 0.13 mm was selected for structural analysis. Intensity data for this compound were collected using an instrument with a Bruker APEX ccd area detector (1) with graphite-monochromated Mo K $\alpha$  radiation ( $\lambda = 0.71073$  Å). The sample was cooled to 100(2) K. Cell parameters were determined from a non-linear least squares fit of 7600 peaks in the range  $2.27 < \theta < 28.27^\circ$ . A total of 9916 data were measured in the range  $1.98 < \theta < 26.00^\circ$  using  $\omega$  oscillation frames. The data were corrected for absorption by the semi-empirical method (2) giving minimum and maximum transmission factors of 0.6730 and 0.8903. The data were merged to form a set of 4890 independent data with  $R(\text{int}) = 0.0200$  and a coverage of 98.7 %.

The triclinic space group  $P\bar{1}$  was determined by statistical tests and verified by subsequent refinement. The structure was solved by direct methods and refined by full-matrix least-squares methods on  $F^2$  (3). Hydrogen atom positions were initially determined by geometry and refined by a riding model. Non-hydrogen atoms were refined with anisotropic displacement parameters. Hydrogen atom displacement parameters were set to 1.2 (1.5 for methyl) times the displacement parameters of the bonded atoms. A total of 331 parameters were refined against 4890 data to give  $wR(F^2) = 0.0813$  and  $S = 1.006$  for weights of  $w = 1/[\sigma^2(F^2) + (0.0420 P)^2 + 0.9000 P]$ , where  $P = [F_o^2 + 2F_c^2] / 3$ . The final  $R(F)$  was 0.0321 for the 4458 observed,  $[F > 4\sigma(F)]$ , data. The largest shift/s.u. was 0.001 in the final refinement cycle. The final difference map had maxima and minima of 0.392 and -0.230 e/Å<sup>3</sup>, respectively.

### Acknowledgment

The authors thank the National Science Foundation (grant CHE-0130835) and the University of Oklahoma for funds to purchase of the X-ray instrument and computers. This structure was determined by Hisanori Ueki.

### References

- (1) (a) Data Collection: SMART Software Reference Manual (1998). Bruker-AXS, 5465 E. Cheryl Parkway, Madison, WI 53711-5373 USA. (b) Data Reduction: SAINT Software Reference Manual (1998). Bruker-AXS, 5465 E. Cheryl Parkway, Madison, WI 53711-5373 USA.
- (2) G. M. Sheldrick (2002). SADABS. Program for Empirical Absorption Correction of Area Detector Data. University of Göttingen, Germany.
- (3) (a) G. M. Sheldrick (2000). SHELXTL Version 6.10 Reference Manual. Bruker-AXS, 5465 E. Cheryl Parkway, Madison, WI 53711-5373 USA. (b) *International Tables for Crystallography, Vol C*, Tables 6.1.1.4, 4.2.6.8, and 4.2.4.2, Kluwer: Boston (1995).

Table 1. Crystal data and structure refinement for 06087.

|                                             |                                                                     |                       |
|---------------------------------------------|---------------------------------------------------------------------|-----------------------|
| Empirical formula                           | C <sub>28</sub> H <sub>28</sub> Cl N <sub>3</sub> Ni O <sub>3</sub> |                       |
| Formula weight                              | 548.69                                                              |                       |
| Crystal system                              | Triclinic                                                           |                       |
| Space group                                 | <i>P</i> $\bar{1}$                                                  |                       |
| Unit cell dimensions                        | <i>a</i> = 9.263(2) Å                                               | $\alpha$ = 86.448(7)° |
|                                             | <i>b</i> = 10.294(2) Å                                              | $\beta$ = 75.238(7)°  |
|                                             | <i>c</i> = 13.643(3) Å                                              | $\gamma$ = 89.471(7)° |
| Volume                                      | 1255.5(5) Å <sup>3</sup>                                            |                       |
| Z, Z'                                       | 2, 1                                                                |                       |
| Density (calculated)                        | 1.451 Mg/m <sup>3</sup>                                             |                       |
| Wavelength                                  | 0.71073 Å                                                           |                       |
| Temperature                                 | 100(2) K                                                            |                       |
| <i>F</i> (000)                              | 572                                                                 |                       |
| Absorption coefficient                      | 0.915 mm <sup>-1</sup>                                              |                       |
| Absorption correction                       | Semi-empirical from equivalents                                     |                       |
| Max. and min. transmission                  | 0.8903 and 0.6730                                                   |                       |
| Theta range for data collection             | 1.98 to 26.00°                                                      |                       |
| Reflections collected                       | 9916                                                                |                       |
| Independent reflections                     | 4890 [R(int) = 0.0200]                                              |                       |
| Data / restraints / parameters              | 4890 / 0 / 331                                                      |                       |
| <i>wR</i> ( <i>F</i> <sup>2</sup> all data) | <i>wR</i> 2 = 0.0813                                                |                       |
| <i>R</i> ( <i>F</i> obsd data)              | <i>R</i> 1 = 0.0321                                                 |                       |
| Goodness-of-fit on <i>F</i> <sup>2</sup>    | 1.006                                                               |                       |
| Observed data [ <i>I</i> > 2σ( <i>I</i> )]  | 4458                                                                |                       |
| Largest and mean shift / s.u.               | 0.001 and 0.000                                                     |                       |
| Largest diff. peak and hole                 | 0.392 and -0.230 e/Å <sup>3</sup>                                   |                       |

-----

$$wR2 = \{ \sum [w(F_o^2 - F_c^2)^2] / \sum [w(F_o^2)^2] \}^{1/2}$$

$$R1 = \sum ||F_o| - |F_c|| / \sum |F_o|$$

Table 2. Atomic coordinates and equivalent isotropic displacement parameters for 06087. U(eq) is defined as one third of the trace of the orthogonalized  $U_{ij}$  tensor.

|       | x           | y            | z            | U(eq)       |
|-------|-------------|--------------|--------------|-------------|
| Ni(1) | 0.56214(3)  | 0.24272(2)   | 0.612657(17) | 0.01300(8)  |
| Cl(1) | 0.42132(5)  | 0.72839(5)   | 0.97526(4)   | 0.01921(11) |
| O(1)  | 0.92509(16) | 0.36666(16)  | 0.67183(12)  | 0.0278(4)   |
| O(2)  | 0.44743(15) | 0.13973(13)  | 0.55160(10)  | 0.0170(3)   |
| O(3)  | 0.24907(15) | 0.00521(13)  | 0.59338(11)  | 0.0196(3)   |
| N(1)  | 0.67491(17) | 0.34274(16)  | 0.67261(12)  | 0.0159(3)   |
| N(2)  | 0.40168(17) | 0.23225(15)  | 0.72605(12)  | 0.0140(3)   |
| N(3)  | 0.73452(18) | 0.24374(16)  | 0.49762(12)  | 0.0152(3)   |
| C(1)  | 0.7411(2)   | 0.34434(19)  | 0.41029(15)  | 0.0190(4)   |
| C(2)  | 0.7531(3)   | 0.4809(2)    | 0.44548(17)  | 0.0273(5)   |
| C(3)  | 0.8747(2)   | 0.3160(2)    | 0.32155(16)  | 0.0246(5)   |
| C(4)  | 0.5980(2)   | 0.3300(2)    | 0.37652(16)  | 0.0258(5)   |
| C(5)  | 0.8639(2)   | 0.2487(2)    | 0.54287(15)  | 0.0185(4)   |
| C(6)  | 0.8258(2)   | 0.3273(2)    | 0.63658(15)  | 0.0192(4)   |
| C(7)  | 0.6158(2)   | 0.42995(19)  | 0.74632(14)  | 0.0161(4)   |
| C(8)  | 0.6983(2)   | 0.5400(2)    | 0.75767(15)  | 0.0208(4)   |
| C(9)  | 0.6390(2)   | 0.6323(2)    | 0.82523(15)  | 0.0203(4)   |
| C(10) | 0.4953(2)   | 0.61422(18)  | 0.88689(14)  | 0.0161(4)   |
| C(11) | 0.4103(2)   | 0.50874(18)  | 0.87892(14)  | 0.0150(4)   |
| C(12) | 0.4671(2)   | 0.41570(18)  | 0.80752(14)  | 0.0140(4)   |
| C(13) | 0.3684(2)   | 0.30825(18)  | 0.80047(14)  | 0.0140(4)   |
| C(14) | 0.2224(2)   | 0.29316(17)  | 0.87907(14)  | 0.0144(4)   |
| C(15) | 0.2139(2)   | 0.24061(19)  | 0.97688(15)  | 0.0184(4)   |
| C(16) | 0.0767(2)   | 0.2343(2)    | 1.04830(15)  | 0.0227(4)   |
| C(17) | -0.0504(2)  | 0.2801(2)    | 1.02286(16)  | 0.0234(4)   |
| C(18) | -0.0424(2)  | 0.3306(2)    | 0.92512(16)  | 0.0224(4)   |
| C(19) | 0.0934(2)   | 0.33698(19)  | 0.85305(15)  | 0.0182(4)   |
| C(20) | 0.3130(2)   | 0.11428(18)  | 0.72536(14)  | 0.0167(4)   |
| C(21) | 0.3656(2)   | 0.00019(19)  | 0.78750(15)  | 0.0196(4)   |
| C(22) | 0.5339(2)   | -0.01037(18) | 0.76791(15)  | 0.0193(4)   |
| C(23) | 0.6037(3)   | 0.02920(19)  | 0.84022(16)  | 0.0231(4)   |
| C(24) | 0.7580(3)   | 0.0259(2)    | 0.82321(18)  | 0.0289(5)   |
| C(25) | 0.8449(3)   | -0.0195(2)   | 0.73360(18)  | 0.0276(5)   |
| C(26) | 0.7768(2)   | -0.0608(2)   | 0.66181(17)  | 0.0253(5)   |
| C(27) | 0.6225(2)   | -0.05533(19) | 0.67795(15)  | 0.0211(4)   |
| C(28) | 0.3352(2)   | 0.08263(18)  | 0.61454(15)  | 0.0165(4)   |

Table 3. Bond lengths [Å] and angles [°] for 06087.

|                  |            |                  |            |
|------------------|------------|------------------|------------|
| Ni(1)-N(1)       | 1.8384(16) | C(9)-H(9)        | 0.9500     |
| Ni(1)-N(2)       | 1.8506(16) | C(10)-C(11)      | 1.373(3)   |
| Ni(1)-O(2)       | 1.8784(13) | C(11)-C(12)      | 1.410(3)   |
| Ni(1)-N(3)       | 1.9324(17) | C(11)-H(11)      | 0.9500     |
| Cl(1)-C(10)      | 1.745(2)   | C(12)-C(13)      | 1.465(3)   |
| O(1)-C(6)        | 1.224(2)   | C(13)-C(14)      | 1.498(2)   |
| O(2)-C(28)       | 1.287(2)   | C(14)-C(15)      | 1.392(3)   |
| O(3)-C(28)       | 1.230(2)   | C(14)-C(19)      | 1.394(3)   |
| N(1)-C(6)        | 1.370(2)   | C(15)-C(16)      | 1.390(3)   |
| N(1)-C(7)        | 1.393(3)   | C(15)-H(15)      | 0.9500     |
| N(2)-C(13)       | 1.293(3)   | C(16)-C(17)      | 1.381(3)   |
| N(2)-C(20)       | 1.474(2)   | C(16)-H(16)      | 0.9500     |
| N(3)-C(5)        | 1.484(2)   | C(17)-C(18)      | 1.385(3)   |
| N(3)-C(1)        | 1.519(2)   | C(17)-H(17)      | 0.9500     |
| N(3)-H(3N)       | 0.80(2)    | C(18)-C(19)      | 1.385(3)   |
| C(1)-C(4)        | 1.521(3)   | C(18)-H(18)      | 0.9500     |
| C(1)-C(2)        | 1.527(3)   | C(19)-H(19)      | 0.9500     |
| C(1)-C(3)        | 1.535(3)   | C(20)-C(28)      | 1.528(3)   |
| C(2)-H(2A)       | 0.9800     | C(20)-C(21)      | 1.553(3)   |
| C(2)-H(2B)       | 0.9800     | C(20)-H(20)      | 1.0000     |
| C(2)-H(2C)       | 0.9800     | C(21)-C(22)      | 1.517(3)   |
| C(3)-H(3A)       | 0.9800     | C(21)-H(21A)     | 0.9900     |
| C(3)-H(3B)       | 0.9800     | C(21)-H(21B)     | 0.9900     |
| C(3)-H(3C)       | 0.9800     | C(22)-C(23)      | 1.392(3)   |
| C(4)-H(4A)       | 0.9800     | C(22)-C(27)      | 1.394(3)   |
| C(4)-H(4B)       | 0.9800     | C(23)-C(24)      | 1.389(3)   |
| C(4)-H(4C)       | 0.9800     | C(23)-H(23)      | 0.9500     |
| C(5)-C(6)        | 1.519(3)   | C(24)-C(25)      | 1.387(3)   |
| C(5)-H(5A)       | 0.9900     | C(24)-H(24)      | 0.9500     |
| C(5)-H(5B)       | 0.9900     | C(25)-C(26)      | 1.381(3)   |
| C(7)-C(8)        | 1.410(3)   | C(25)-H(25)      | 0.9500     |
| C(7)-C(12)       | 1.421(3)   | C(26)-C(27)      | 1.392(3)   |
| C(8)-C(9)        | 1.377(3)   | C(26)-H(26)      | 0.9500     |
| C(8)-H(8)        | 0.9500     | C(27)-H(27)      | 0.9500     |
| C(9)-C(10)       | 1.388(3)   |                  |            |
| N(1)-Ni(1)-N(2)  | 93.68(7)   | C(7)-N(1)-Ni(1)  | 124.27(13) |
| N(1)-Ni(1)-O(2)  | 179.70(7)  | C(13)-N(2)-C(20) | 121.53(16) |
| N(2)-Ni(1)-O(2)  | 86.35(6)   | C(13)-N(2)-Ni(1) | 128.71(13) |
| N(1)-Ni(1)-N(3)  | 86.36(7)   | C(20)-N(2)-Ni(1) | 109.68(12) |
| N(2)-Ni(1)-N(3)  | 176.38(7)  | C(5)-N(3)-C(1)   | 114.02(15) |
| O(2)-Ni(1)-N(3)  | 93.59(7)   | C(5)-N(3)-Ni(1)  | 104.40(12) |
| C(28)-O(2)-Ni(1) | 114.18(12) | C(1)-N(3)-Ni(1)  | 118.10(12) |
| C(6)-N(1)-C(7)   | 121.64(16) | C(5)-N(3)-H(3N)  | 110.4(17)  |
| C(6)-N(1)-Ni(1)  | 114.08(13) | C(1)-N(3)-H(3N)  | 105.6(17)  |



|                   |            |                     |            |
|-------------------|------------|---------------------|------------|
| Ni(1)-N(3)-H(3N)  | 103.9(17)  | C(12)-C(11)-H(11)   | 119.7      |
| N(3)-C(1)-C(4)    | 107.10(16) | C(11)-C(12)-C(7)    | 119.04(17) |
| N(3)-C(1)-C(2)    | 109.98(16) | C(11)-C(12)-C(13)   | 117.76(17) |
| C(4)-C(1)-C(2)    | 110.51(18) | C(7)-C(12)-C(13)    | 123.20(17) |
| N(3)-C(1)-C(3)    | 109.46(16) | N(2)-C(13)-C(12)    | 121.42(17) |
| C(4)-C(1)-C(3)    | 108.85(17) | N(2)-C(13)-C(14)    | 120.49(16) |
| C(2)-C(1)-C(3)    | 110.86(17) | C(12)-C(13)-C(14)   | 117.99(16) |
| C(1)-C(2)-H(2A)   | 109.5      | C(15)-C(14)-C(19)   | 119.90(18) |
| C(1)-C(2)-H(2B)   | 109.5      | C(15)-C(14)-C(13)   | 121.79(17) |
| H(2A)-C(2)-H(2B)  | 109.5      | C(19)-C(14)-C(13)   | 118.28(17) |
| C(1)-C(2)-H(2C)   | 109.5      | C(16)-C(15)-C(14)   | 119.51(18) |
| H(2A)-C(2)-H(2C)  | 109.5      | C(16)-C(15)-H(15)   | 120.2      |
| H(2B)-C(2)-H(2C)  | 109.5      | C(14)-C(15)-H(15)   | 120.2      |
| C(1)-C(3)-H(3A)   | 109.5      | C(17)-C(16)-C(15)   | 120.45(18) |
| C(1)-C(3)-H(3B)   | 109.5      | C(17)-C(16)-H(16)   | 119.8      |
| H(3A)-C(3)-H(3B)  | 109.5      | C(15)-C(16)-H(16)   | 119.8      |
| C(1)-C(3)-H(3C)   | 109.5      | C(16)-C(17)-C(18)   | 120.07(19) |
| H(3A)-C(3)-H(3C)  | 109.5      | C(16)-C(17)-H(17)   | 120.0      |
| H(3B)-C(3)-H(3C)  | 109.5      | C(18)-C(17)-H(17)   | 120.0      |
| C(1)-C(4)-H(4A)   | 109.5      | C(19)-C(18)-C(17)   | 120.11(19) |
| C(1)-C(4)-H(4B)   | 109.5      | C(19)-C(18)-H(18)   | 119.9      |
| H(4A)-C(4)-H(4B)  | 109.5      | C(17)-C(18)-H(18)   | 119.9      |
| C(1)-C(4)-H(4C)   | 109.5      | C(18)-C(19)-C(14)   | 119.94(18) |
| H(4A)-C(4)-H(4C)  | 109.5      | C(18)-C(19)-H(19)   | 120.0      |
| H(4B)-C(4)-H(4C)  | 109.5      | C(14)-C(19)-H(19)   | 120.0      |
| N(3)-C(5)-C(6)    | 110.42(16) | N(2)-C(20)-C(28)    | 107.32(15) |
| N(3)-C(5)-H(5A)   | 109.6      | N(2)-C(20)-C(21)    | 109.91(15) |
| C(6)-C(5)-H(5A)   | 109.6      | C(28)-C(20)-C(21)   | 111.06(16) |
| N(3)-C(5)-H(5B)   | 109.6      | N(2)-C(20)-H(20)    | 109.5      |
| C(6)-C(5)-H(5B)   | 109.6      | C(28)-C(20)-H(20)   | 109.5      |
| H(5A)-C(5)-H(5B)  | 108.1      | C(21)-C(20)-H(20)   | 109.5      |
| O(1)-C(6)-N(1)    | 127.81(19) | C(22)-C(21)-C(20)   | 114.06(16) |
| O(1)-C(6)-C(5)    | 120.26(18) | C(22)-C(21)-H(21A)  | 108.7      |
| N(1)-C(6)-C(5)    | 111.92(16) | C(20)-C(21)-H(21A)  | 108.7      |
| N(1)-C(7)-C(8)    | 120.89(17) | C(22)-C(21)-H(21B)  | 108.7      |
| N(1)-C(7)-C(12)   | 121.01(17) | C(20)-C(21)-H(21B)  | 108.7      |
| C(8)-C(7)-C(12)   | 117.96(18) | H(21A)-C(21)-H(21B) | 107.6      |
| C(9)-C(8)-C(7)    | 122.11(19) | C(23)-C(22)-C(27)   | 118.4(2)   |
| C(9)-C(8)-H(8)    | 118.9      | C(23)-C(22)-C(21)   | 119.50(19) |
| C(7)-C(8)-H(8)    | 118.9      | C(27)-C(22)-C(21)   | 122.05(18) |
| C(8)-C(9)-C(10)   | 119.02(18) | C(24)-C(23)-C(22)   | 121.2(2)   |
| C(8)-C(9)-H(9)    | 120.5      | C(24)-C(23)-H(23)   | 119.4      |
| C(10)-C(9)-H(9)   | 120.5      | C(22)-C(23)-H(23)   | 119.4      |
| C(11)-C(10)-C(9)  | 121.15(18) | C(25)-C(24)-C(23)   | 119.9(2)   |
| C(11)-C(10)-Cl(1) | 119.55(15) | C(25)-C(24)-H(24)   | 120.1      |
| C(9)-C(10)-Cl(1)  | 119.30(15) | C(23)-C(24)-H(24)   | 120.1      |
| C(10)-C(11)-C(12) | 120.64(18) | C(26)-C(25)-C(24)   | 119.5(2)   |
| C(10)-C(11)-H(11) | 119.7      | C(26)-C(25)-H(25)   | 120.2      |

|                   |          |                   |            |
|-------------------|----------|-------------------|------------|
| C(24)-C(25)-H(25) | 120.2    | C(26)-C(27)-H(27) | 119.8      |
| C(25)-C(26)-C(27) | 120.6(2) | C(22)-C(27)-H(27) | 119.8      |
| C(25)-C(26)-H(26) | 119.7    | O(3)-C(28)-O(2)   | 126.06(18) |
| C(27)-C(26)-H(26) | 119.7    | O(3)-C(28)-C(20)  | 118.79(17) |
| C(26)-C(27)-C(22) | 120.3(2) | O(2)-C(28)-C(20)  | 115.13(16) |

---

Table 4. Anisotropic displacement parameters ( $\text{\AA}^2 \times 10^3$ ) for 06087. The anisotropic displacement factor exponent takes the form:

$$-2 \pi^2 [ h^2 a^{*2} U_{11} + \dots + 2 h k a^* b^* U_{12} ]$$

|       | $U_{11}$ | $U_{22}$ | $U_{33}$ | $U_{23}$ | $U_{13}$ | $U_{12}$ |
|-------|----------|----------|----------|----------|----------|----------|
| Ni(1) | 11(1)    | 16(1)    | 11(1)    | -1(1)    | -1(1)    | -3(1)    |
| Cl(1) | 18(1)    | 19(1)    | 21(1)    | -6(1)    | -4(1)    | -1(1)    |
| O(1)  | 15(1)    | 43(1)    | 27(1)    | -9(1)    | -6(1)    | -4(1)    |
| O(2)  | 15(1)    | 21(1)    | 15(1)    | -2(1)    | -2(1)    | -3(1)    |
| O(3)  | 15(1)    | 21(1)    | 23(1)    | -7(1)    | -4(1)    | -4(1)    |
| N(1)  | 13(1)    | 20(1)    | 14(1)    | -1(1)    | -2(1)    | -3(1)    |
| N(2)  | 13(1)    | 16(1)    | 14(1)    | 0(1)     | -5(1)    | -2(1)    |
| N(3)  | 15(1)    | 15(1)    | 15(1)    | -2(1)    | -2(1)    | -2(1)    |
| C(1)  | 23(1)    | 18(1)    | 14(1)    | 0(1)     | 1(1)     | -1(1)    |
| C(2)  | 39(1)    | 16(1)    | 21(1)    | -1(1)    | 2(1)     | -1(1)    |
| C(3)  | 25(1)    | 25(1)    | 18(1)    | -1(1)    | 4(1)     | -4(1)    |
| C(4)  | 25(1)    | 30(1)    | 21(1)    | 5(1)     | -4(1)    | 3(1)     |
| C(5)  | 11(1)    | 24(1)    | 20(1)    | -2(1)    | -2(1)    | -2(1)    |
| C(6)  | 14(1)    | 23(1)    | 20(1)    | 1(1)     | -3(1)    | -3(1)    |
| C(7)  | 17(1)    | 19(1)    | 13(1)    | 1(1)     | -5(1)    | -3(1)    |
| C(8)  | 15(1)    | 28(1)    | 18(1)    | -2(1)    | -1(1)    | -7(1)    |
| C(9)  | 21(1)    | 22(1)    | 18(1)    | -1(1)    | -6(1)    | -8(1)    |
| C(10) | 18(1)    | 17(1)    | 13(1)    | -3(1)    | -4(1)    | 0(1)     |
| C(11) | 14(1)    | 19(1)    | 12(1)    | 1(1)     | -4(1)    | -1(1)    |
| C(12) | 14(1)    | 17(1)    | 12(1)    | 3(1)     | -5(1)    | -3(1)    |
| C(13) | 13(1)    | 17(1)    | 12(1)    | 2(1)     | -3(1)    | 1(1)     |
| C(14) | 15(1)    | 13(1)    | 14(1)    | -3(1)    | -2(1)    | -3(1)    |
| C(15) | 14(1)    | 25(1)    | 17(1)    | -1(1)    | -5(1)    | 1(1)     |
| C(16) | 20(1)    | 34(1)    | 13(1)    | 2(1)     | -2(1)    | 0(1)     |
| C(17) | 14(1)    | 34(1)    | 19(1)    | -1(1)    | 2(1)     | 1(1)     |
| C(18) | 15(1)    | 29(1)    | 22(1)    | 0(1)     | -5(1)    | 2(1)     |
| C(19) | 18(1)    | 22(1)    | 15(1)    | 1(1)     | -4(1)    | -2(1)    |
| C(20) | 14(1)    | 17(1)    | 18(1)    | -2(1)    | -2(1)    | -4(1)    |
| C(21) | 25(1)    | 18(1)    | 15(1)    | 0(1)     | -2(1)    | -5(1)    |
| C(22) | 26(1)    | 13(1)    | 19(1)    | 3(1)     | -6(1)    | -2(1)    |
| C(23) | 32(1)    | 18(1)    | 20(1)    | -1(1)    | -9(1)    | 1(1)     |
| C(24) | 35(1)    | 24(1)    | 34(1)    | 1(1)     | -21(1)   | -1(1)    |
| C(25) | 22(1)    | 24(1)    | 38(1)    | 5(1)     | -12(1)   | 2(1)     |
| C(26) | 27(1)    | 21(1)    | 26(1)    | 2(1)     | -4(1)    | 4(1)     |
| C(27) | 25(1)    | 20(1)    | 18(1)    | 0(1)     | -6(1)    | -1(1)    |
| C(28) | 15(1)    | 17(1)    | 18(1)    | -4(1)    | -3(1)    | 2(1)     |

Table 5. Hydrogen coordinates and isotropic displacement parameters for 06087.

|        | x        | y        | z          | U(eq) |
|--------|----------|----------|------------|-------|
| H(3N)  | 0.730(3) | 0.175(2) | 0.4746(18) | 0.018 |
| H(2A)  | 0.6691   | 0.4955   | 0.5039     | 0.041 |
| H(2B)  | 0.7508   | 0.5454   | 0.3900     | 0.041 |
| H(2C)  | 0.8471   | 0.4893   | 0.4651     | 0.041 |
| H(3A)  | 0.9676   | 0.3272   | 0.3420     | 0.037 |
| H(3B)  | 0.8741   | 0.3764   | 0.2632     | 0.037 |
| H(3C)  | 0.8676   | 0.2264   | 0.3027     | 0.037 |
| H(4A)  | 0.5899   | 0.2409   | 0.3569     | 0.039 |
| H(4B)  | 0.5998   | 0.3914   | 0.3184     | 0.039 |
| H(4C)  | 0.5120   | 0.3484   | 0.4326     | 0.039 |
| H(5A)  | 0.9506   | 0.2888   | 0.4923     | 0.022 |
| H(5B)  | 0.8915   | 0.1591   | 0.5616     | 0.022 |
| H(8)   | 0.7980   | 0.5508   | 0.7174     | 0.025 |
| H(9)   | 0.6955   | 0.7073   | 0.8296     | 0.024 |
| H(11)  | 0.3123   | 0.4983   | 0.9219     | 0.018 |
| H(15)  | 0.3012   | 0.2093   | 0.9947     | 0.022 |
| H(16)  | 0.0703   | 0.1982   | 1.1151     | 0.027 |
| H(17)  | -0.1435  | 0.2770   | 1.0725     | 0.028 |
| H(18)  | -0.1302  | 0.3608   | 0.9075     | 0.027 |
| H(19)  | 0.0987   | 0.3712   | 0.7859     | 0.022 |
| H(20)  | 0.2050   | 0.1318   | 0.7559     | 0.020 |
| H(21A) | 0.3226   | 0.0114   | 0.8607     | 0.024 |
| H(21B) | 0.3258   | -0.0824  | 0.7711     | 0.024 |
| H(23)  | 0.5448   | 0.0590   | 0.9023     | 0.028 |
| H(24)  | 0.8040   | 0.0547   | 0.8729     | 0.035 |
| H(25)  | 0.9505   | -0.0222  | 0.7217     | 0.033 |
| H(26)  | 0.8360   | -0.0932  | 0.6008     | 0.030 |
| H(27)  | 0.5772   | -0.0824  | 0.6274     | 0.025 |

Table 6. Torsion angles [°] for 06087.

|                        |             |                         |             |
|------------------------|-------------|-------------------------|-------------|
| N(1)-Ni(1)-O(2)-C(28)  | 80(13)      | Cl(1)-C(10)-C(11)-C(12) | 179.46(14)  |
| N(2)-Ni(1)-O(2)-C(28)  | -15.81(13)  | C(10)-C(11)-C(12)-C(7)  | 2.3(3)      |
| N(3)-Ni(1)-O(2)-C(28)  | 160.56(13)  | C(10)-C(11)-C(12)-C(13) | -177.75(17) |
| N(2)-Ni(1)-N(1)-C(6)   | 151.45(14)  | N(1)-C(7)-C(12)-C(11)   | -177.95(16) |
| O(2)-Ni(1)-N(1)-C(6)   | 56(13)      | C(8)-C(7)-C(12)-C(11)   | -2.2(3)     |
| N(3)-Ni(1)-N(1)-C(6)   | -24.92(14)  | N(1)-C(7)-C(12)-C(13)   | 2.1(3)      |
| N(2)-Ni(1)-N(1)-C(7)   | -30.21(15)  | C(8)-C(7)-C(12)-C(13)   | 177.88(17)  |
| O(2)-Ni(1)-N(1)-C(7)   | -126(13)    | C(20)-N(2)-C(13)-C(12)  | 172.01(16)  |
| N(3)-Ni(1)-N(1)-C(7)   | 153.42(15)  | Ni(1)-N(2)-C(13)-C(12)  | -4.3(3)     |
| N(1)-Ni(1)-N(2)-C(13)  | 21.38(17)   | C(20)-N(2)-C(13)-C(14)  | -11.6(3)    |
| O(2)-Ni(1)-N(2)-C(13)  | -158.92(17) | Ni(1)-N(2)-C(13)-C(14)  | 172.16(13)  |
| N(3)-Ni(1)-N(2)-C(13)  | 111.9(11)   | C(11)-C(12)-C(13)-N(2)  | 167.87(17)  |
| N(1)-Ni(1)-N(2)-C(20)  | -155.26(12) | C(7)-C(12)-C(13)-N(2)   | -12.2(3)    |
| O(2)-Ni(1)-N(2)-C(20)  | 24.44(12)   | C(11)-C(12)-C(13)-C(14) | -8.6(2)     |
| N(3)-Ni(1)-N(2)-C(20)  | -64.8(11)   | C(7)-C(12)-C(13)-C(14)  | 171.28(16)  |
| N(1)-Ni(1)-N(3)-C(5)   | 32.10(12)   | N(2)-C(13)-C(14)-C(15)  | 106.8(2)    |
| N(2)-Ni(1)-N(3)-C(5)   | -58.6(11)   | C(12)-C(13)-C(14)-C(15) | -76.6(2)    |
| O(2)-Ni(1)-N(3)-C(5)   | -147.60(12) | N(2)-C(13)-C(14)-C(19)  | -75.1(2)    |
| N(1)-Ni(1)-N(3)-C(1)   | -95.74(14)  | C(12)-C(13)-C(14)-C(19) | 101.5(2)    |
| N(2)-Ni(1)-N(3)-C(1)   | 173.5(10)   | C(19)-C(14)-C(15)-C(16) | -1.0(3)     |
| O(2)-Ni(1)-N(3)-C(1)   | 84.56(14)   | C(13)-C(14)-C(15)-C(16) | 177.04(18)  |
| C(5)-N(3)-C(1)-C(4)    | -177.40(16) | C(14)-C(15)-C(16)-C(17) | -0.2(3)     |
| Ni(1)-N(3)-C(1)-C(4)   | -54.27(19)  | C(15)-C(16)-C(17)-C(18) | 1.2(3)      |
| C(5)-N(3)-C(1)-C(2)    | -57.3(2)    | C(16)-C(17)-C(18)-C(19) | -0.9(3)     |
| Ni(1)-N(3)-C(1)-C(2)   | 65.85(19)   | C(17)-C(18)-C(19)-C(14) | -0.3(3)     |
| C(5)-N(3)-C(1)-C(3)    | 64.7(2)     | C(15)-C(14)-C(19)-C(18) | 1.3(3)      |
| Ni(1)-N(3)-C(1)-C(3)   | -172.12(13) | C(13)-C(14)-C(19)-C(18) | -176.83(18) |
| C(1)-N(3)-C(5)-C(6)    | 96.75(19)   | C(13)-N(2)-C(20)-C(28)  | 155.64(17)  |
| Ni(1)-N(3)-C(5)-C(6)   | -33.55(17)  | Ni(1)-N(2)-C(20)-C(28)  | -27.44(17)  |
| C(7)-N(1)-C(6)-O(1)    | 12.8(3)     | C(13)-N(2)-C(20)-C(21)  | -83.5(2)    |
| Ni(1)-N(1)-C(6)-O(1)   | -168.81(18) | Ni(1)-N(2)-C(20)-C(21)  | 93.44(15)   |
| C(7)-N(1)-C(6)-C(5)    | -168.48(16) | N(2)-C(20)-C(21)-C(22)  | -43.1(2)    |
| Ni(1)-N(1)-C(6)-C(5)   | 9.9(2)      | C(28)-C(20)-C(21)-C(22) | 75.5(2)     |
| N(3)-C(5)-C(6)-O(1)    | -164.11(18) | C(20)-C(21)-C(22)-C(23) | 105.0(2)    |
| N(3)-C(5)-C(6)-N(1)    | 17.1(2)     | C(20)-C(21)-C(22)-C(27) | -73.1(2)    |
| C(6)-N(1)-C(7)-C(8)    | 26.0(3)     | C(27)-C(22)-C(23)-C(24) | 0.8(3)      |
| Ni(1)-N(1)-C(7)-C(8)   | -152.26(15) | C(21)-C(22)-C(23)-C(24) | -177.38(18) |
| C(6)-N(1)-C(7)-C(12)   | -158.41(18) | C(22)-C(23)-C(24)-C(25) | -1.1(3)     |
| Ni(1)-N(1)-C(7)-C(12)  | 23.4(2)     | C(23)-C(24)-C(25)-C(26) | 0.2(3)      |
| N(1)-C(7)-C(8)-C(9)    | 175.61(18)  | C(24)-C(25)-C(26)-C(27) | 1.0(3)      |
| C(12)-C(7)-C(8)-C(9)   | -0.2(3)     | C(25)-C(26)-C(27)-C(22) | -1.3(3)     |
| C(7)-C(8)-C(9)-C(10)   | 2.4(3)      | C(23)-C(22)-C(27)-C(26) | 0.3(3)      |
| C(8)-C(9)-C(10)-C(11)  | -2.3(3)     | C(21)-C(22)-C(27)-C(26) | 178.51(18)  |
| C(8)-C(9)-C(10)-Cl(1)  | 178.17(15)  | Ni(1)-O(2)-C(28)-O(3)   | -175.89(16) |
| C(9)-C(10)-C(11)-C(12) | 0.0(3)      | Ni(1)-O(2)-C(28)-C(20)  | 2.6(2)      |

|                        |             |
|------------------------|-------------|
| N(2)-C(20)-C(28)-O(3)  | -165.04(17) |
| C(21)-C(20)-C(28)-O(3) | 74.8(2)     |
| N(2)-C(20)-C(28)-O(2)  | 16.3(2)     |
| C(21)-C(20)-C(28)-O(2) | -103.83(19) |

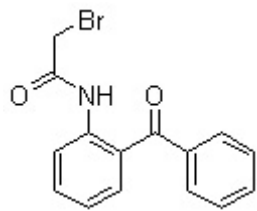

**6a**

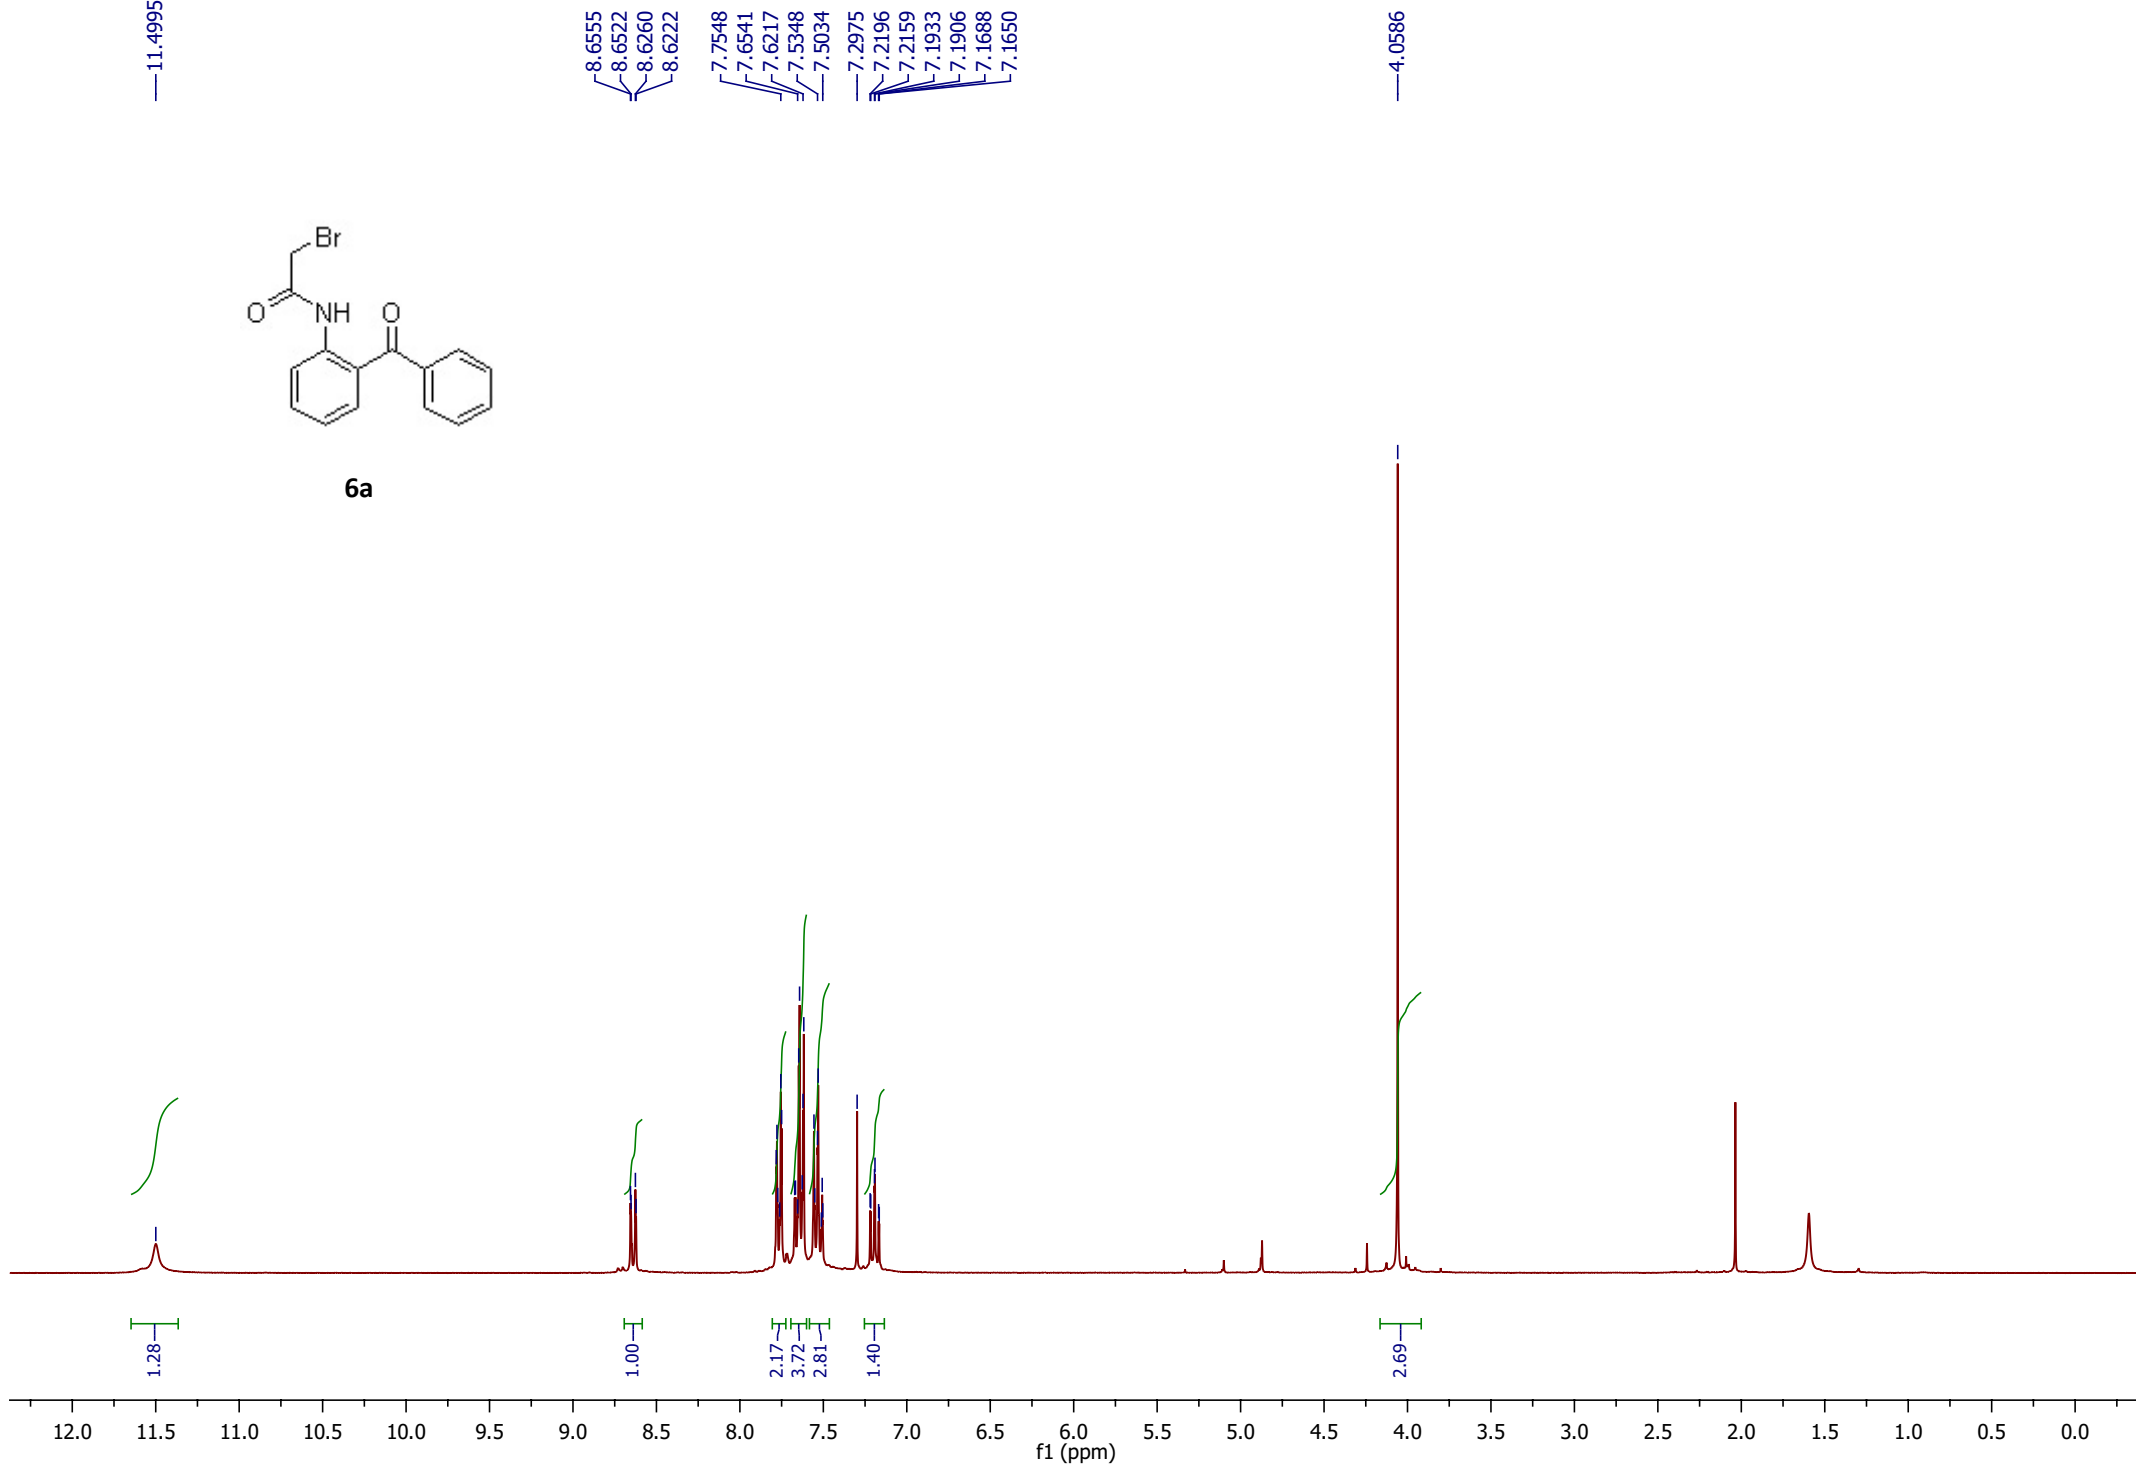

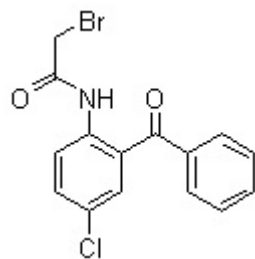

**6b**

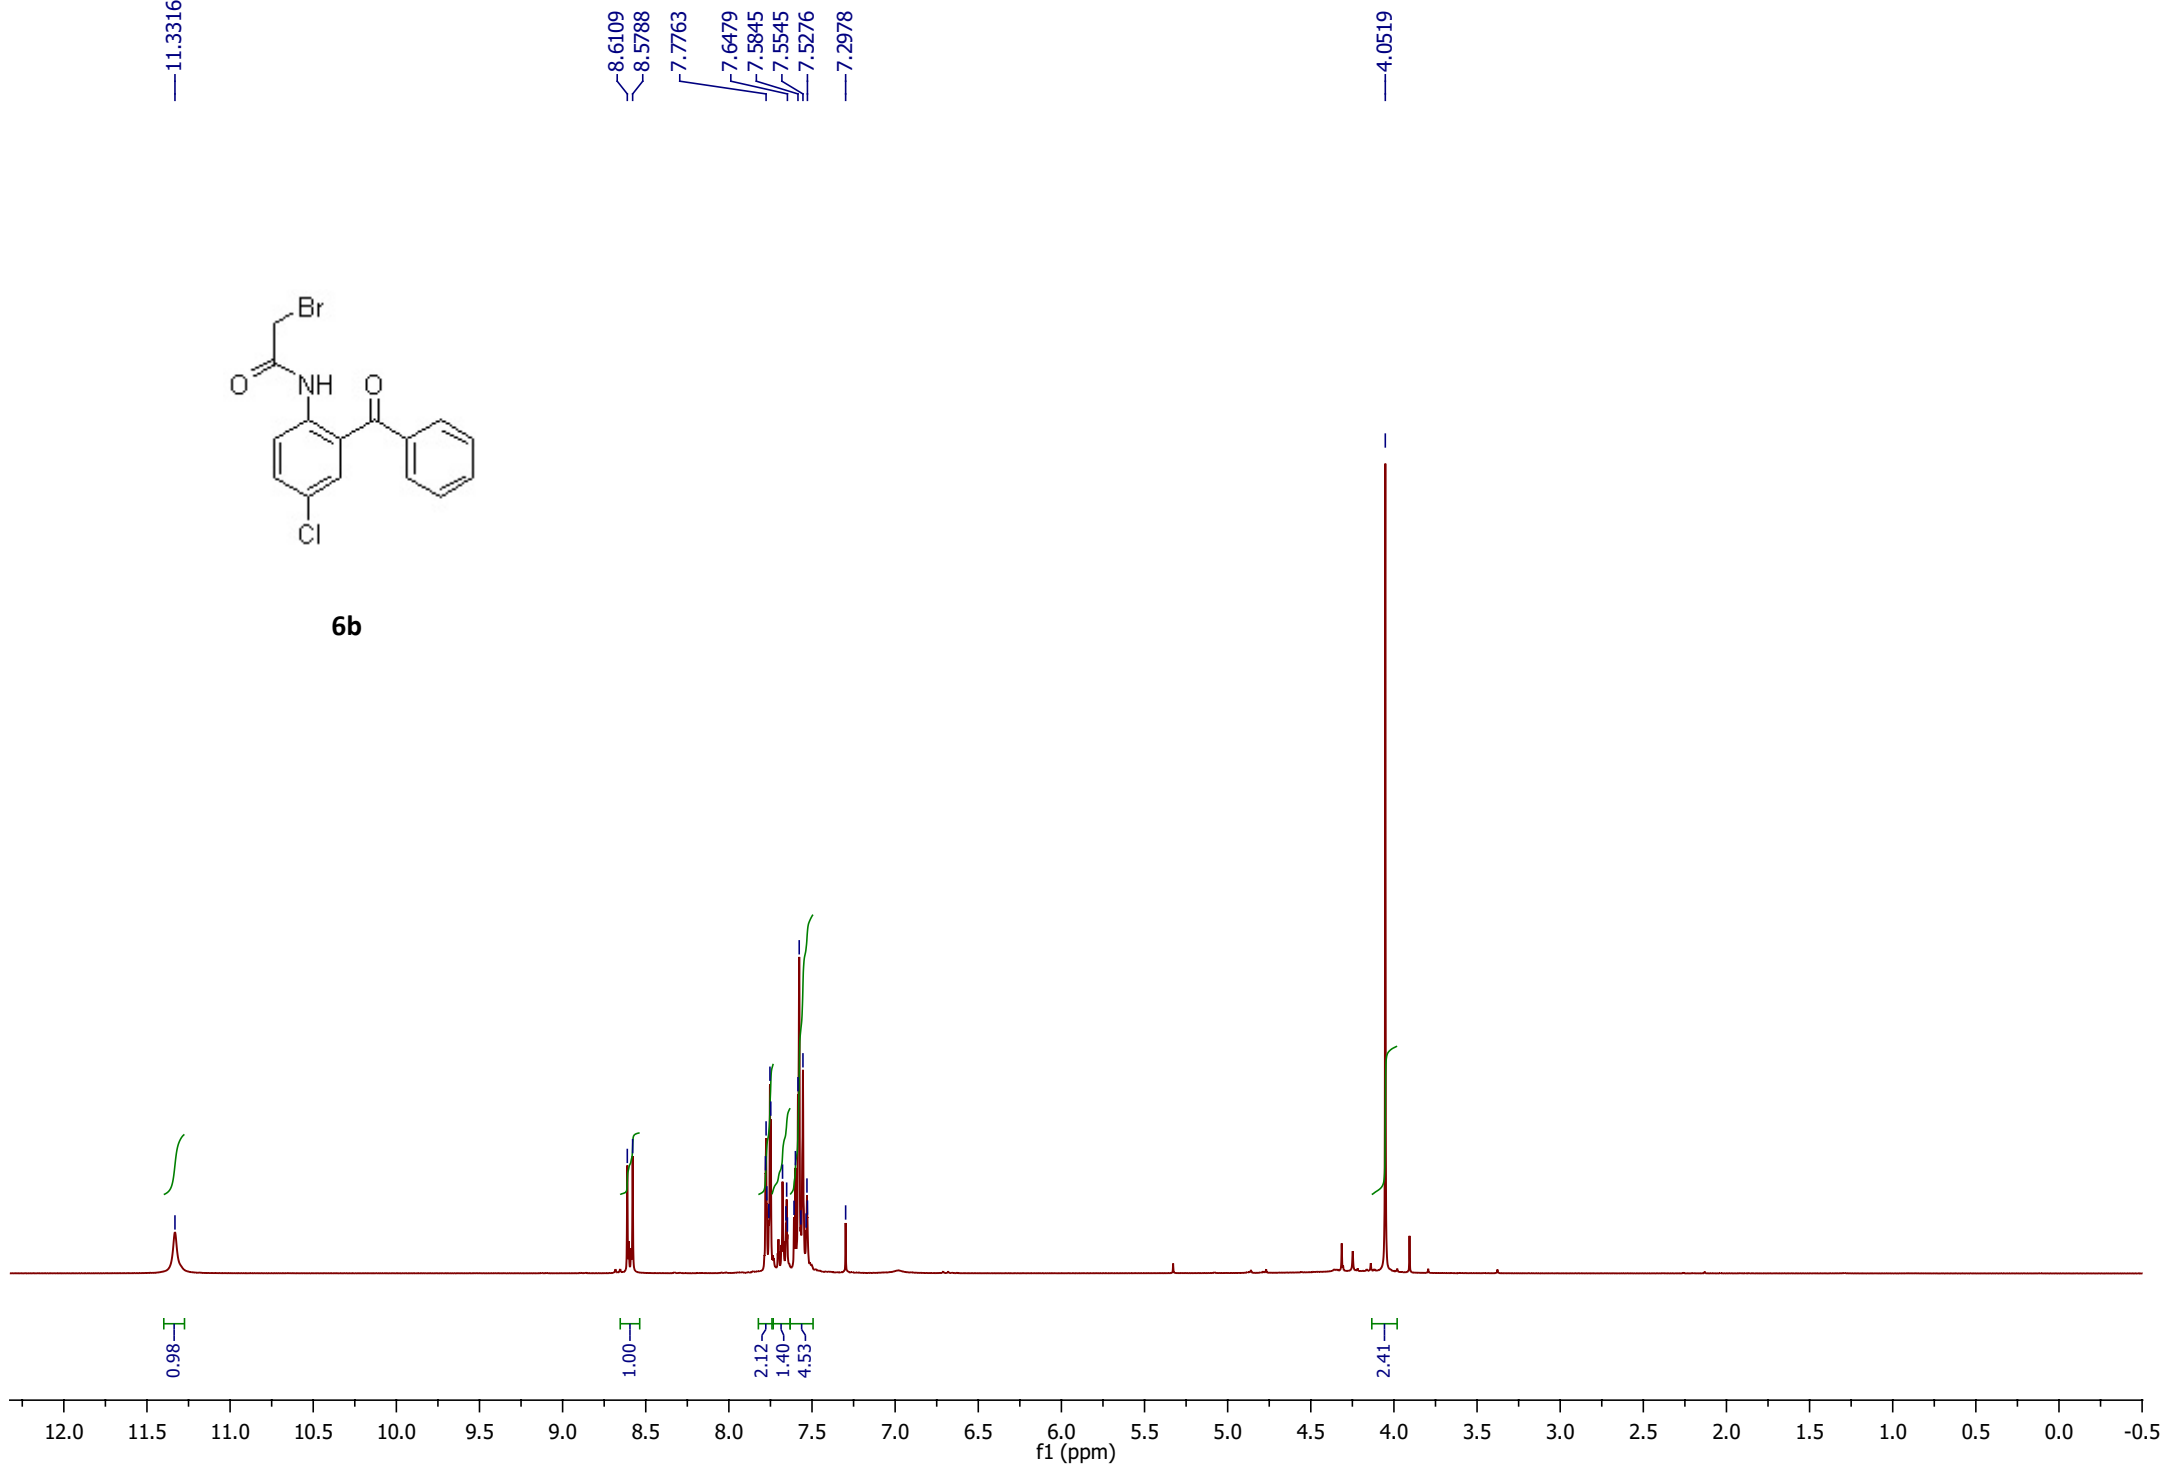



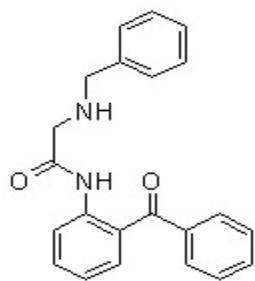

**8a**

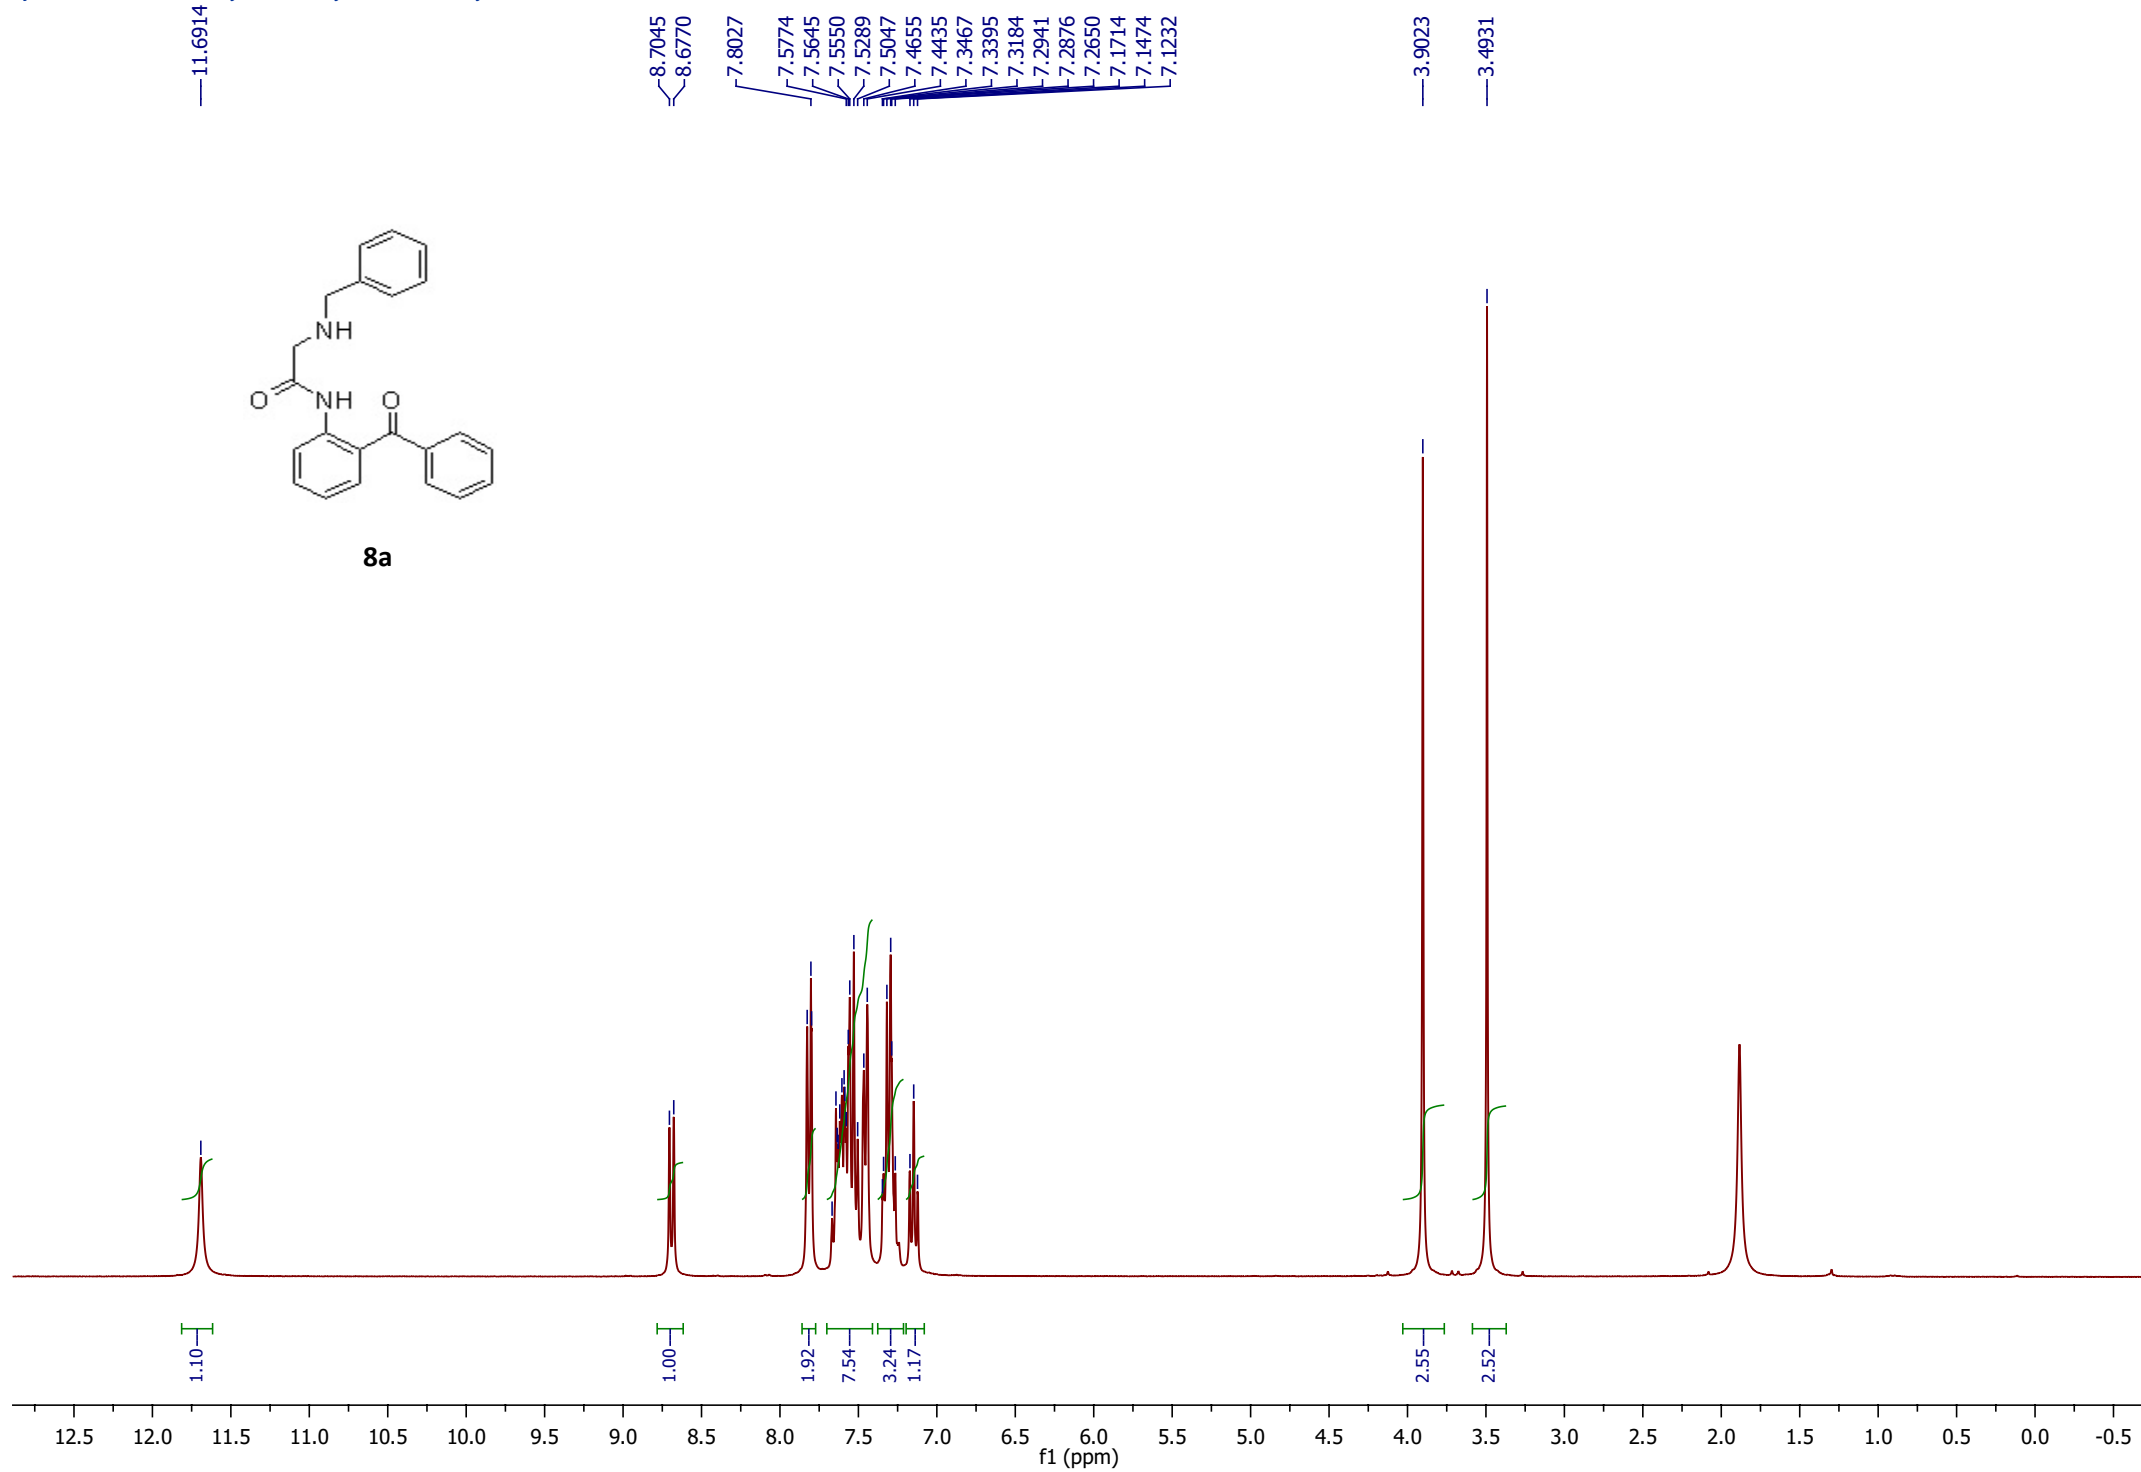

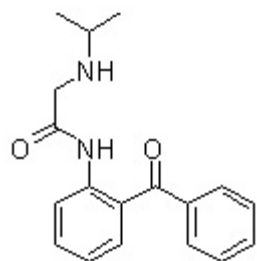

**8b**

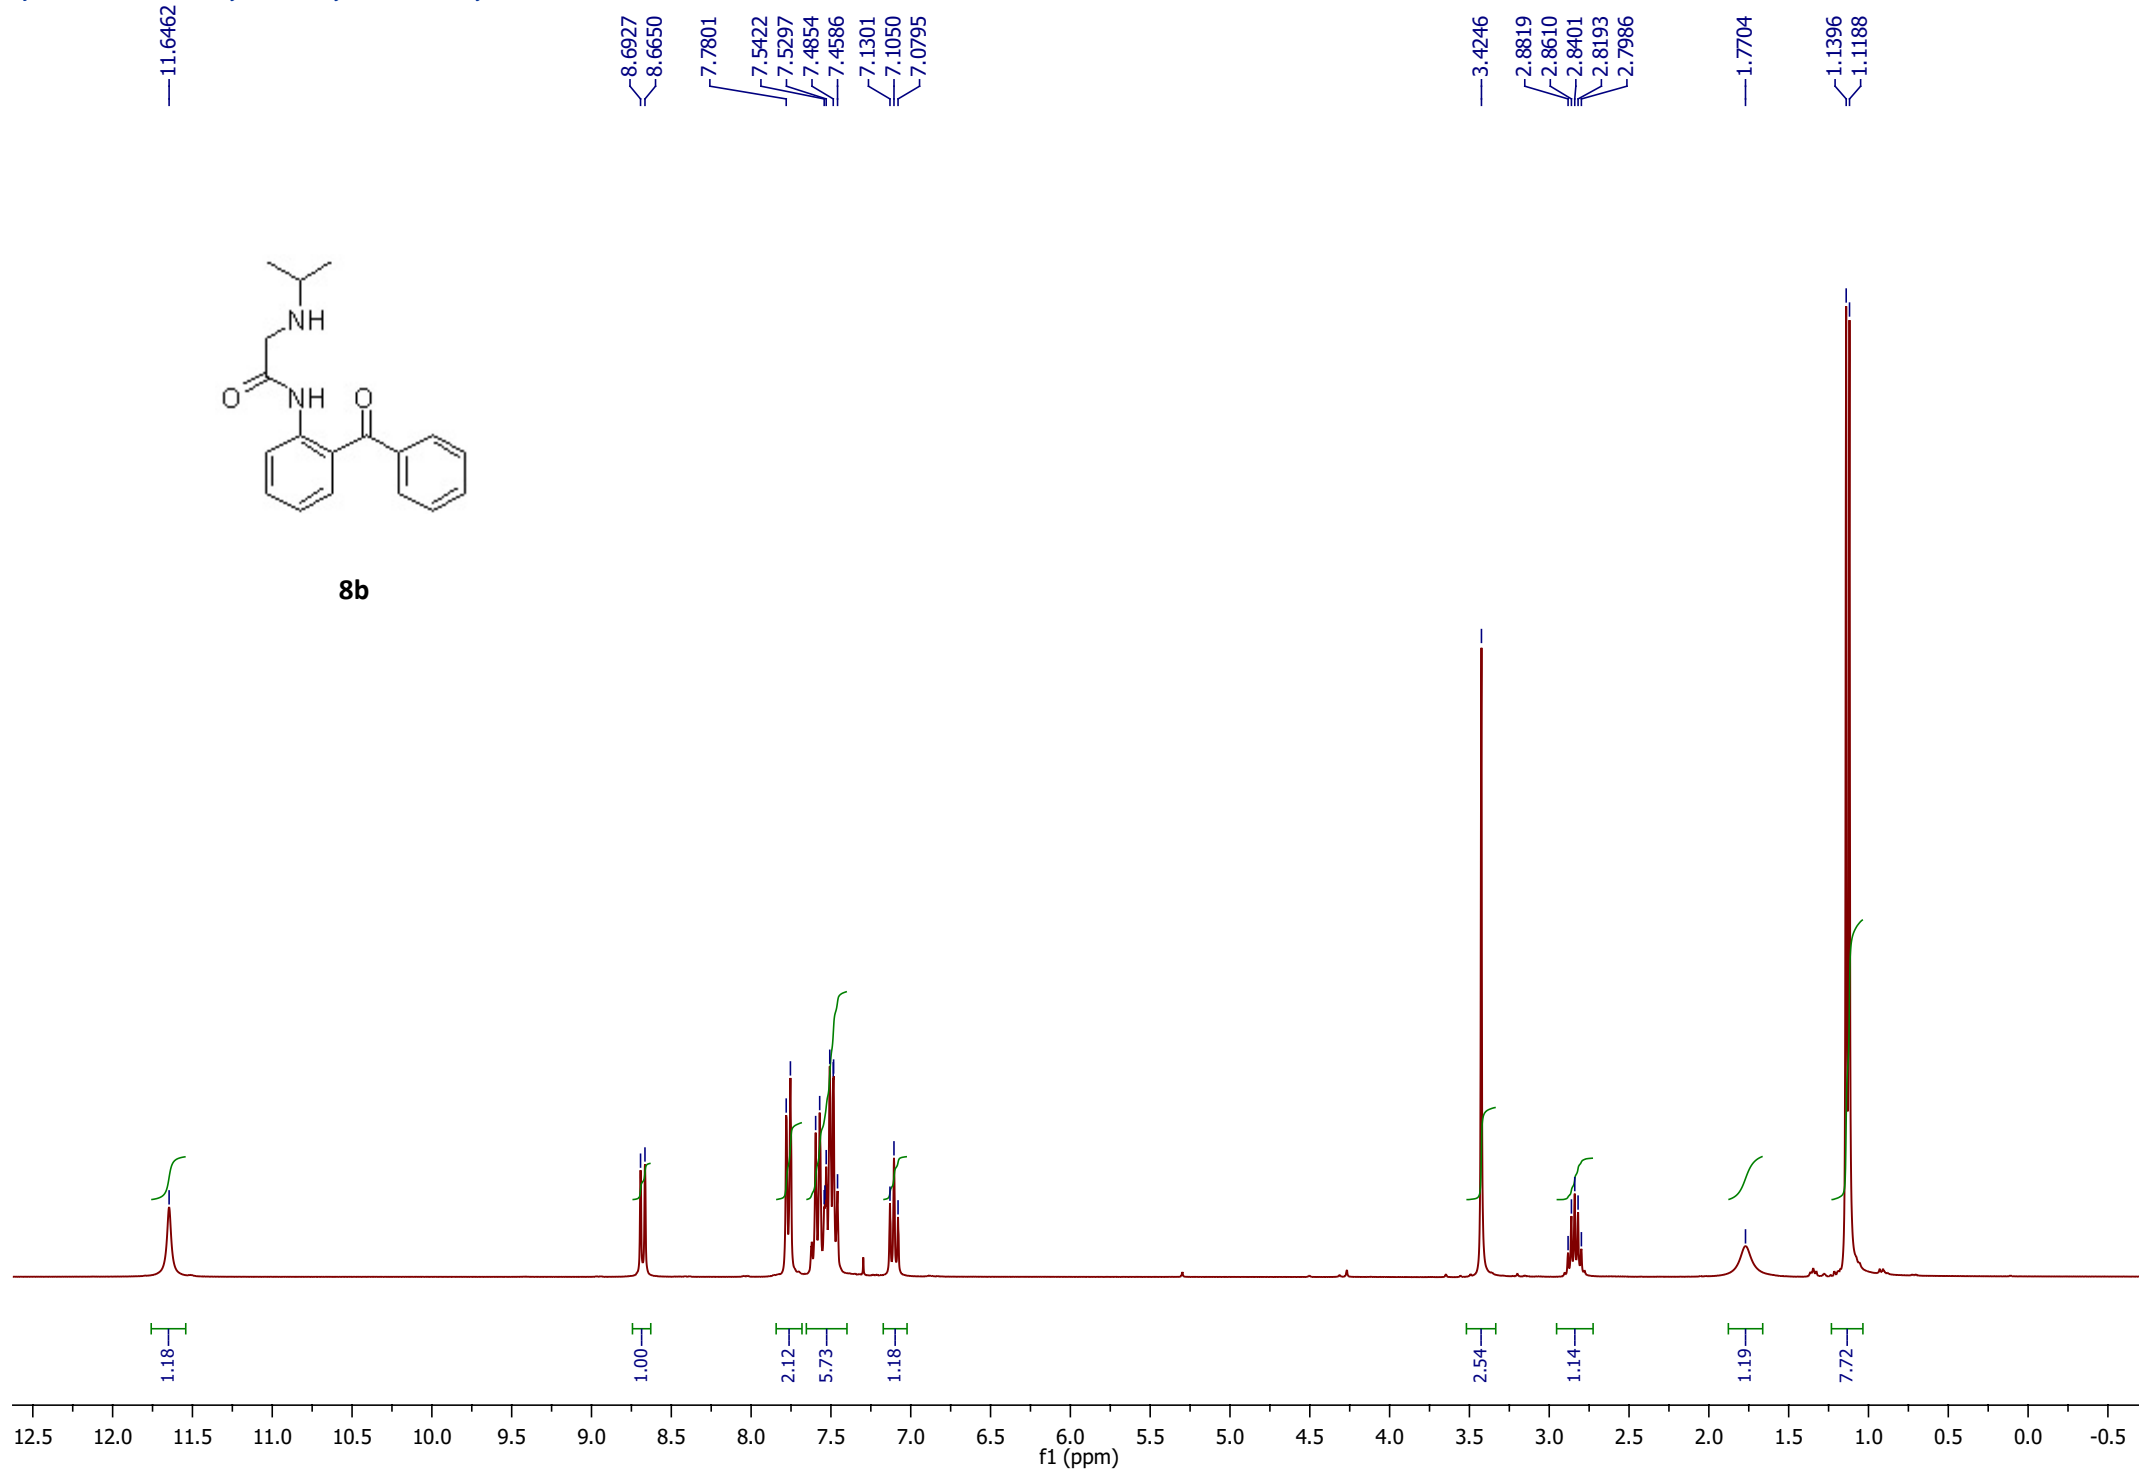

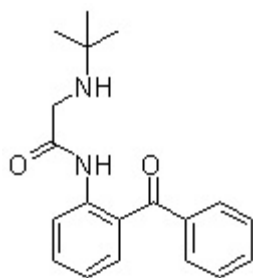

8c

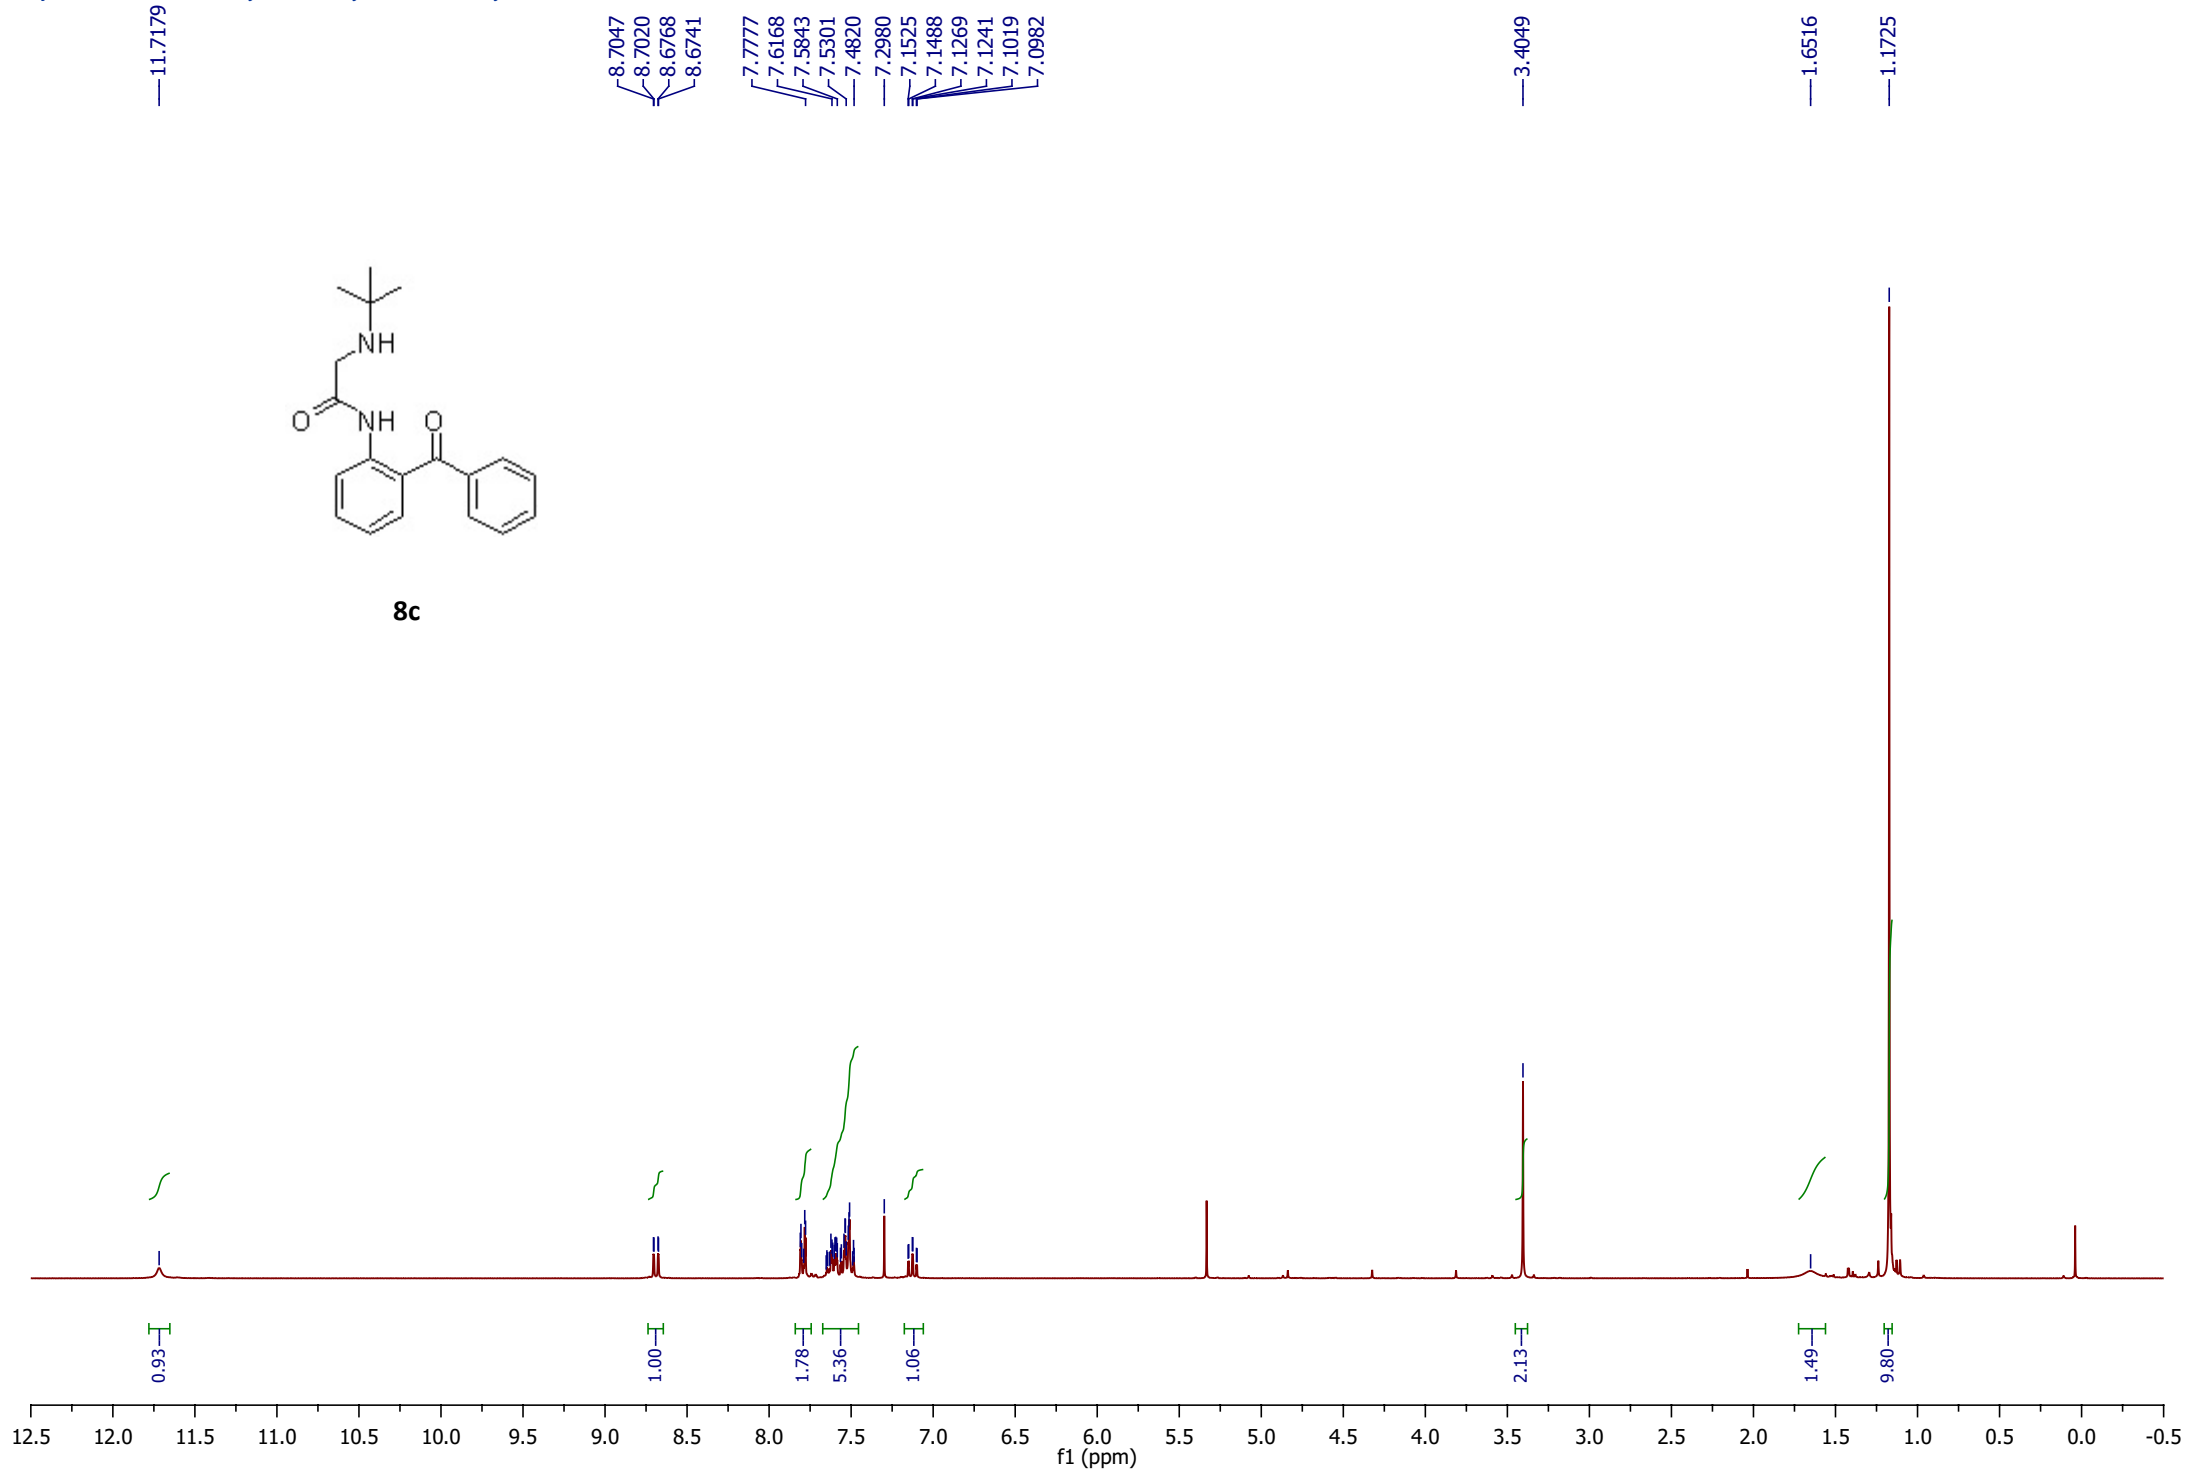

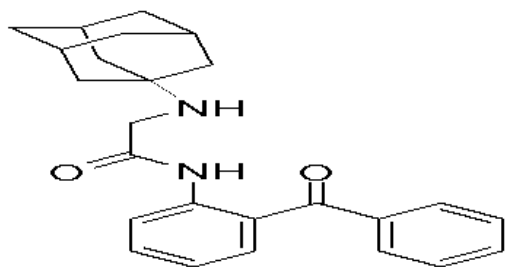

8d

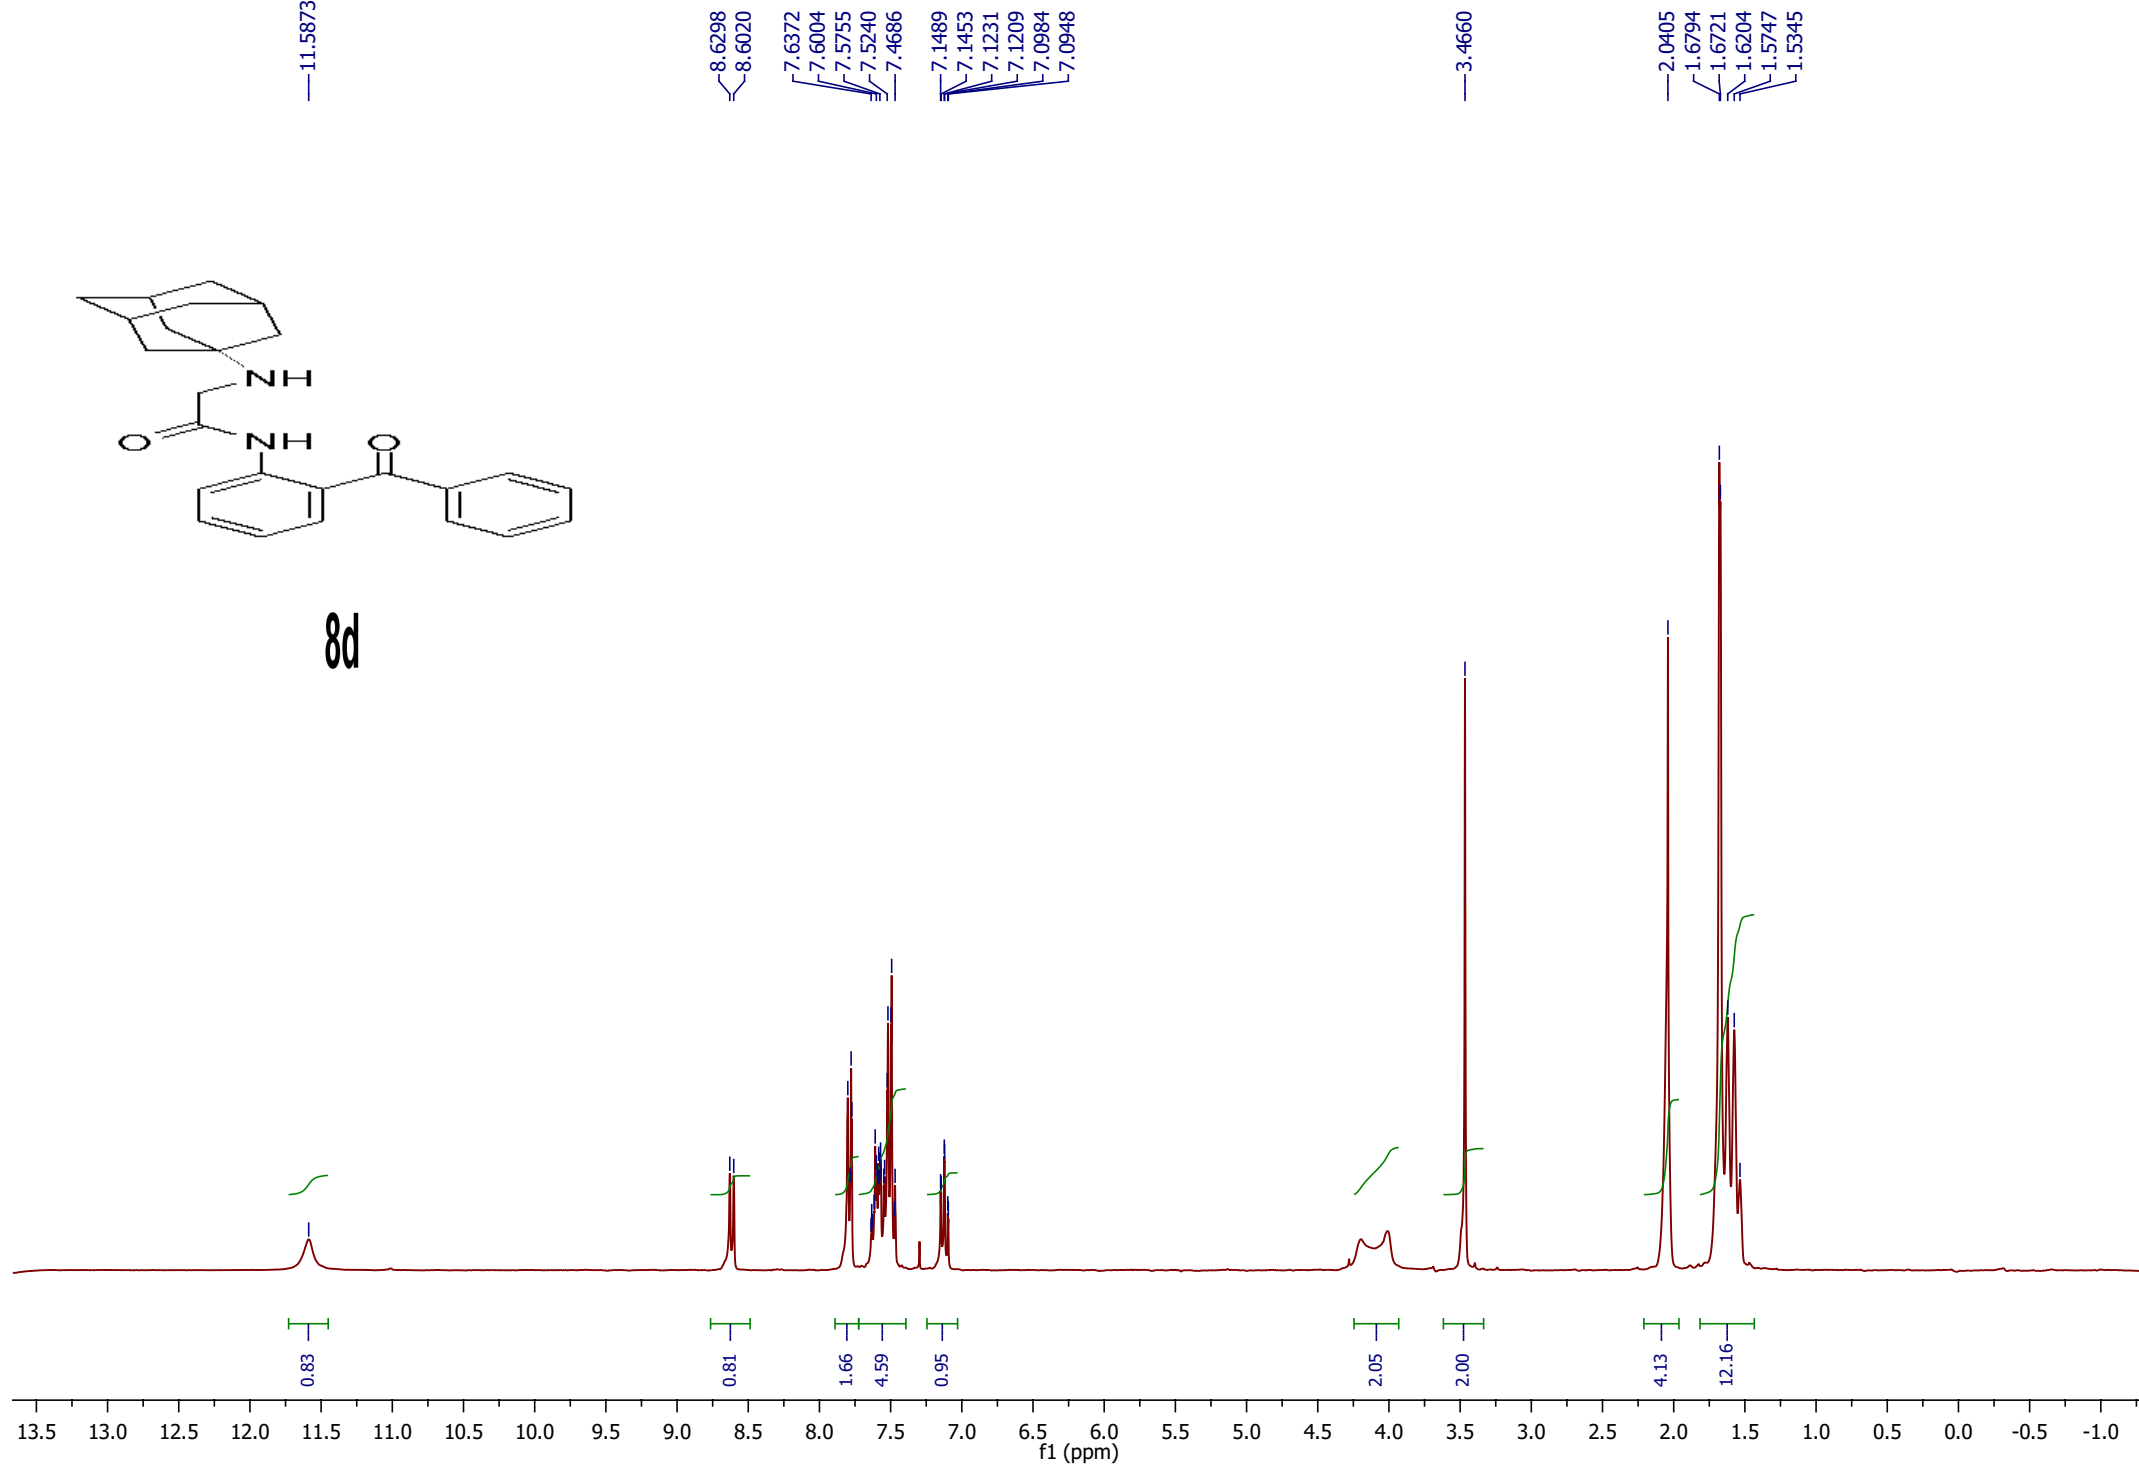

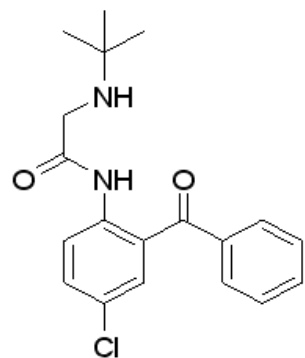

**9**

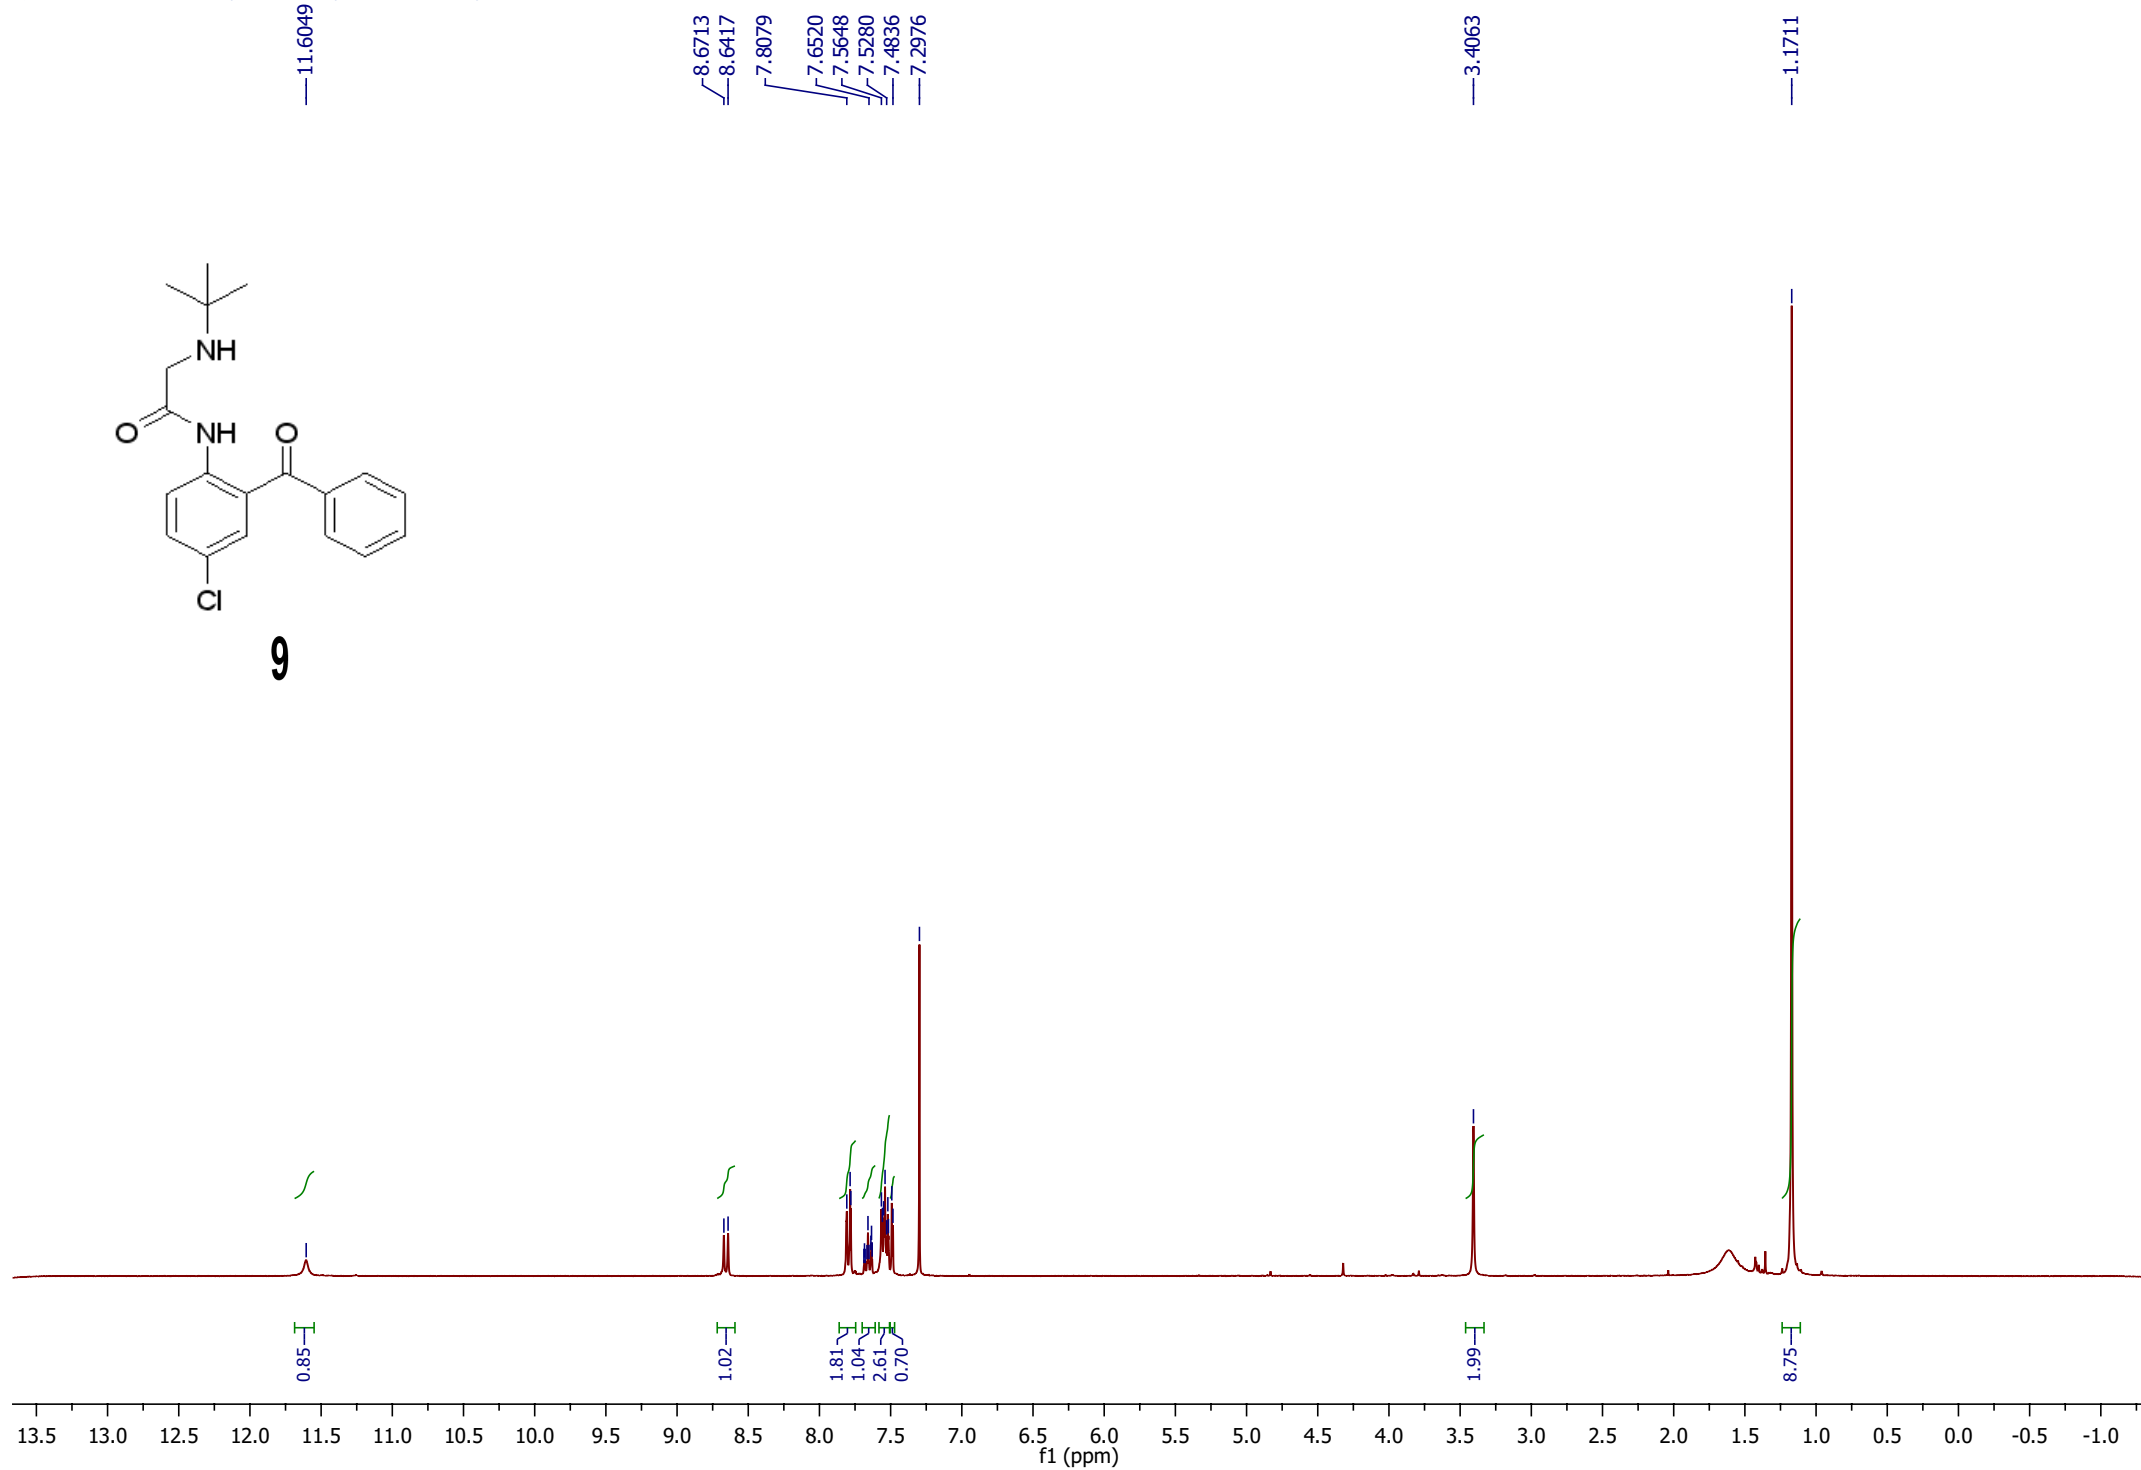

8.6500  
8.6218

7.4490  
7.4281  
7.4048  
7.3828  
7.3556  
7.2969  
7.1895  
7.1663  
7.0334  
6.9571  
6.9309  
6.8589  
6.8352  
6.8091

4.4684  
4.4225

4.0090  
3.9733  
3.9579  
3.9447

3.6595  
3.6363

3.2798  
3.2236

3.0827

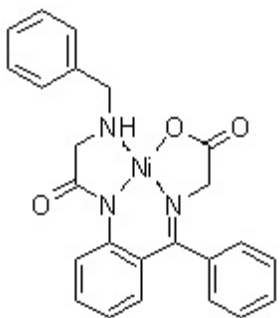

10a

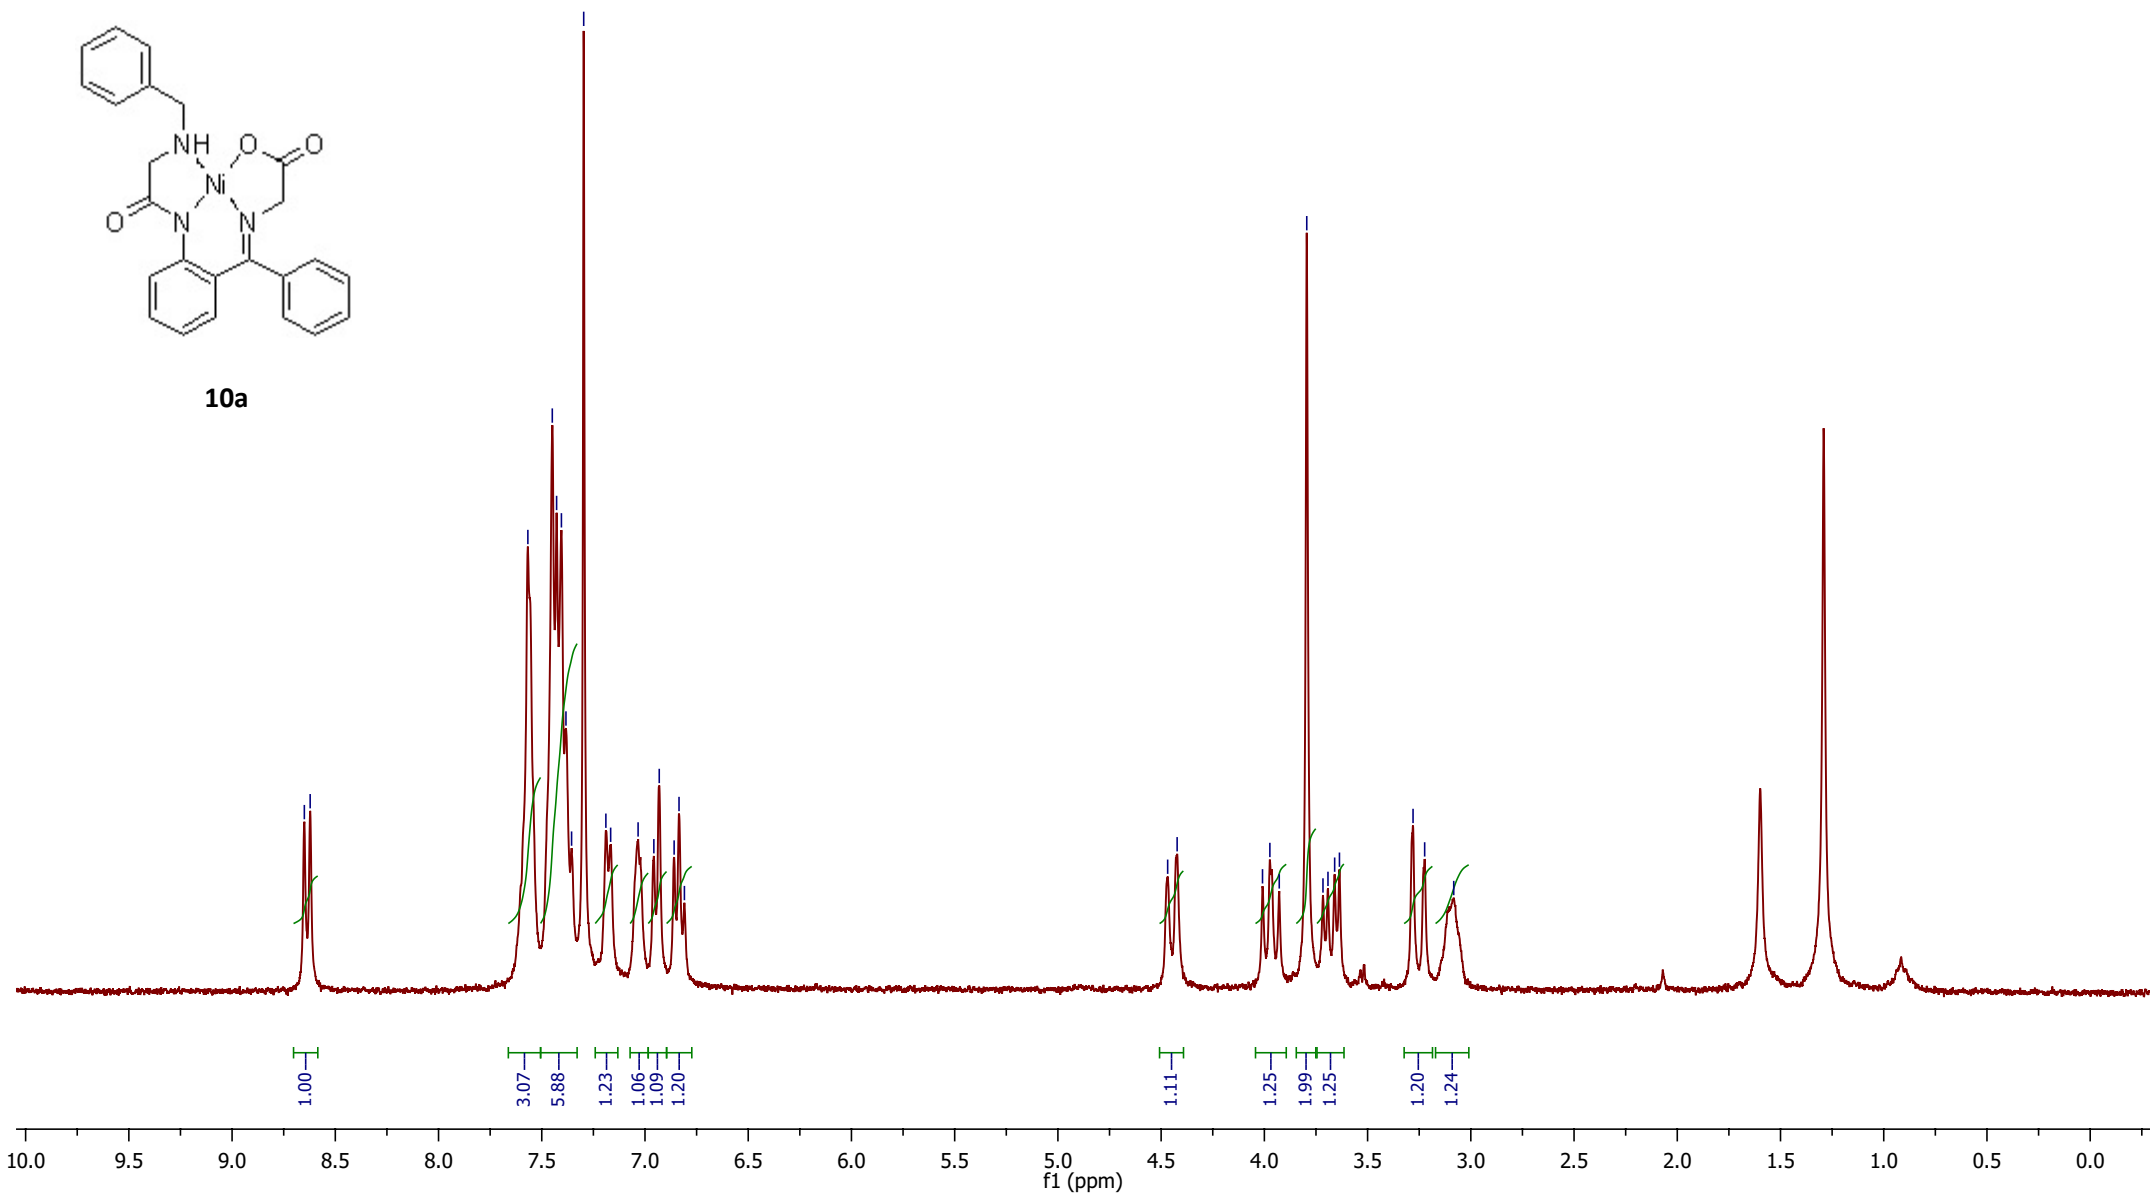

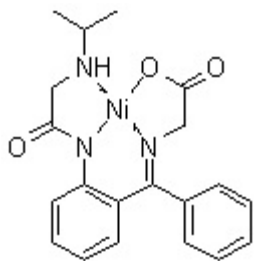

10b

8.5693  
8.5406  
7.5618  
7.4117  
7.3884  
7.3776  
7.3542  
7.2097  
7.1830  
7.0175  
7.0101  
6.9992  
6.9507  
6.9456  
6.9234  
6.9182  
6.8557  
6.8321  
6.8084

4.0329  
4.0076  
3.9765  
3.9514  
3.7486  
3.3223  
3.1540  
3.1320  
3.1140  
3.0927  
2.7990

1.6729  
1.6511  
1.5707  
1.5489

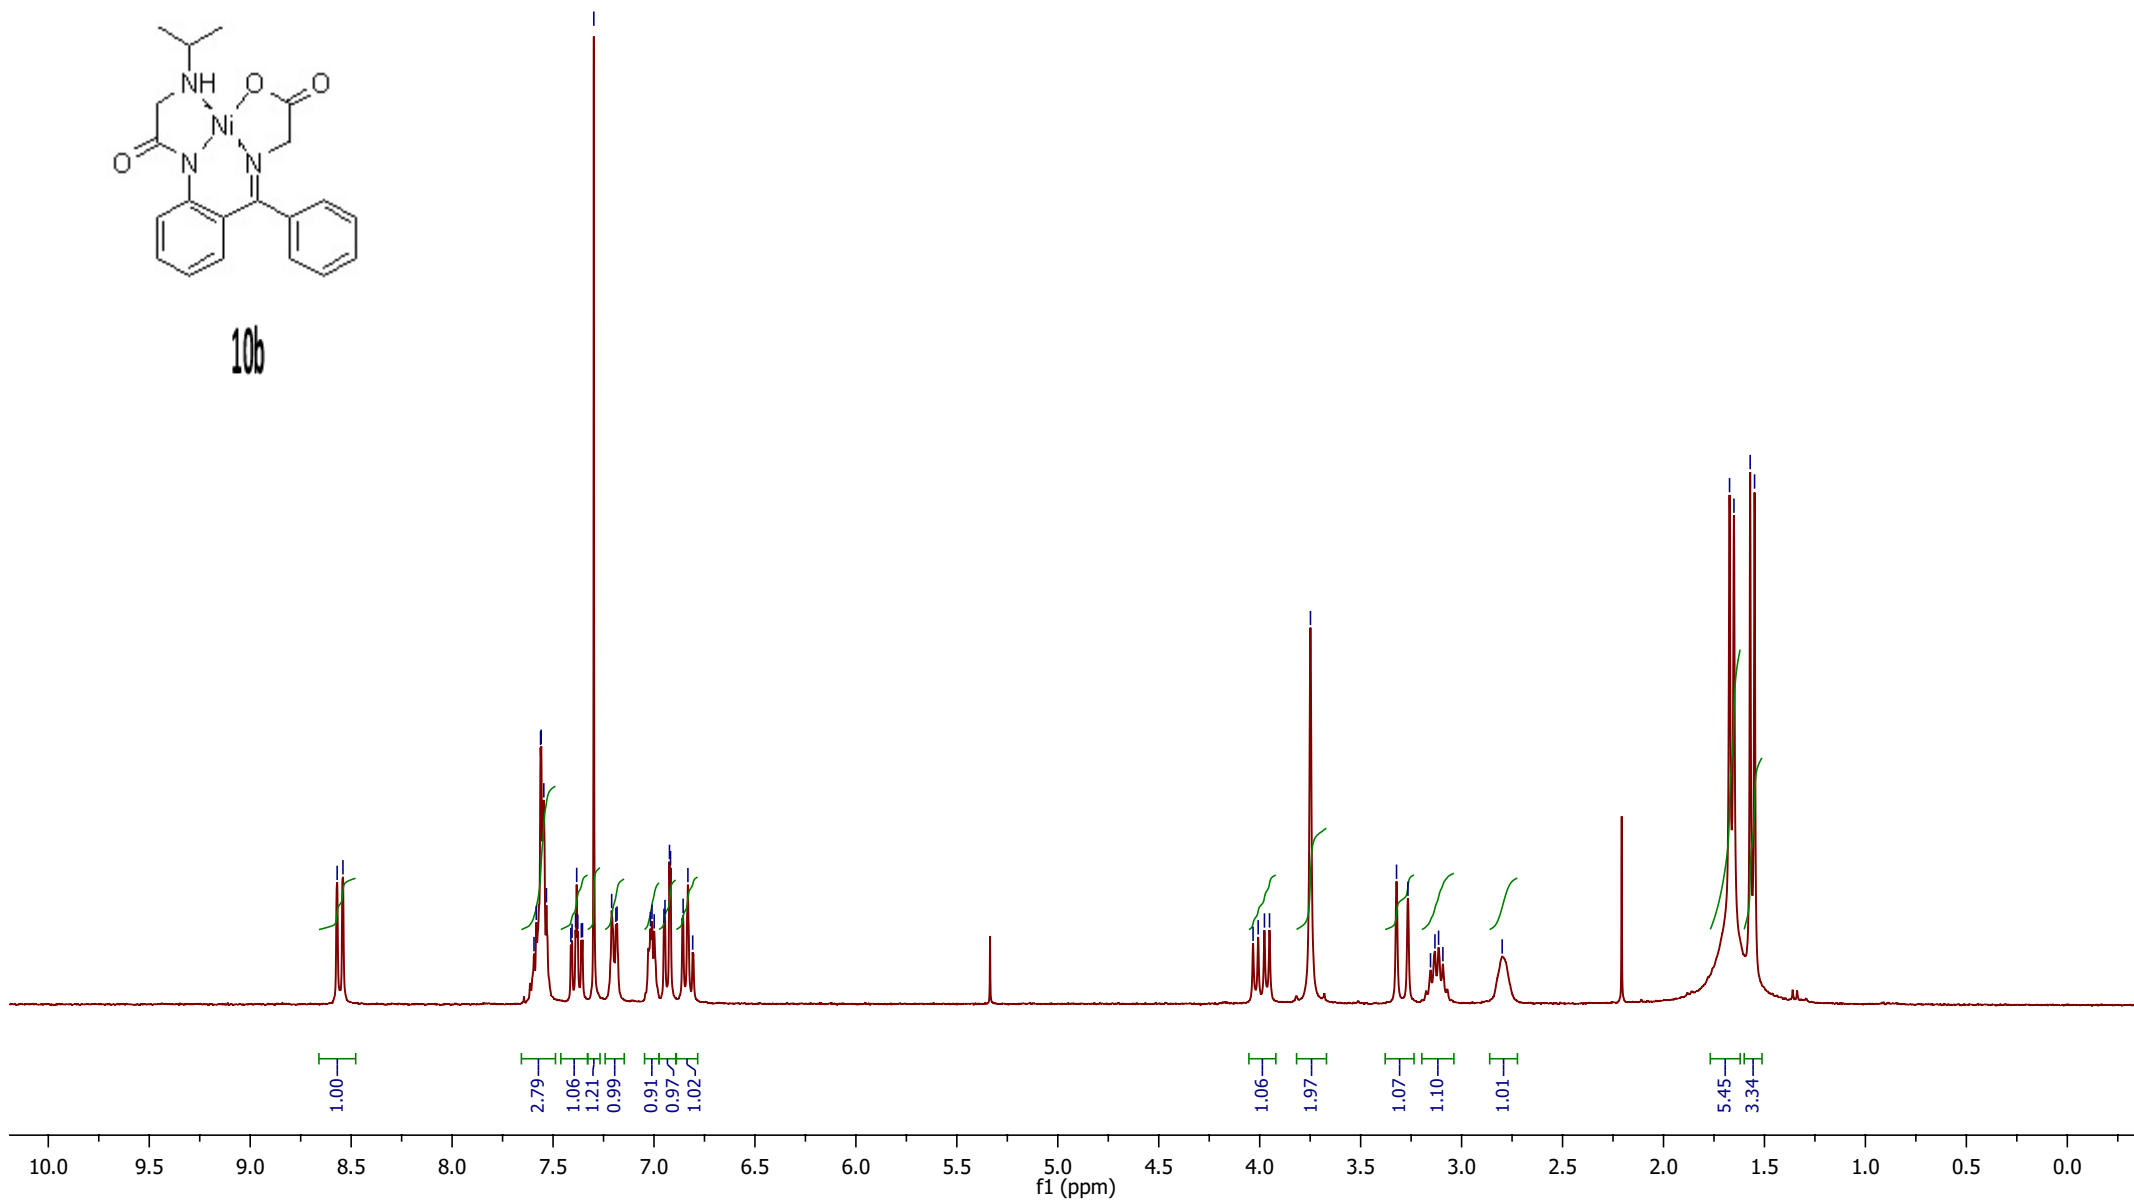

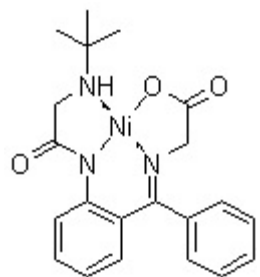

**10c**

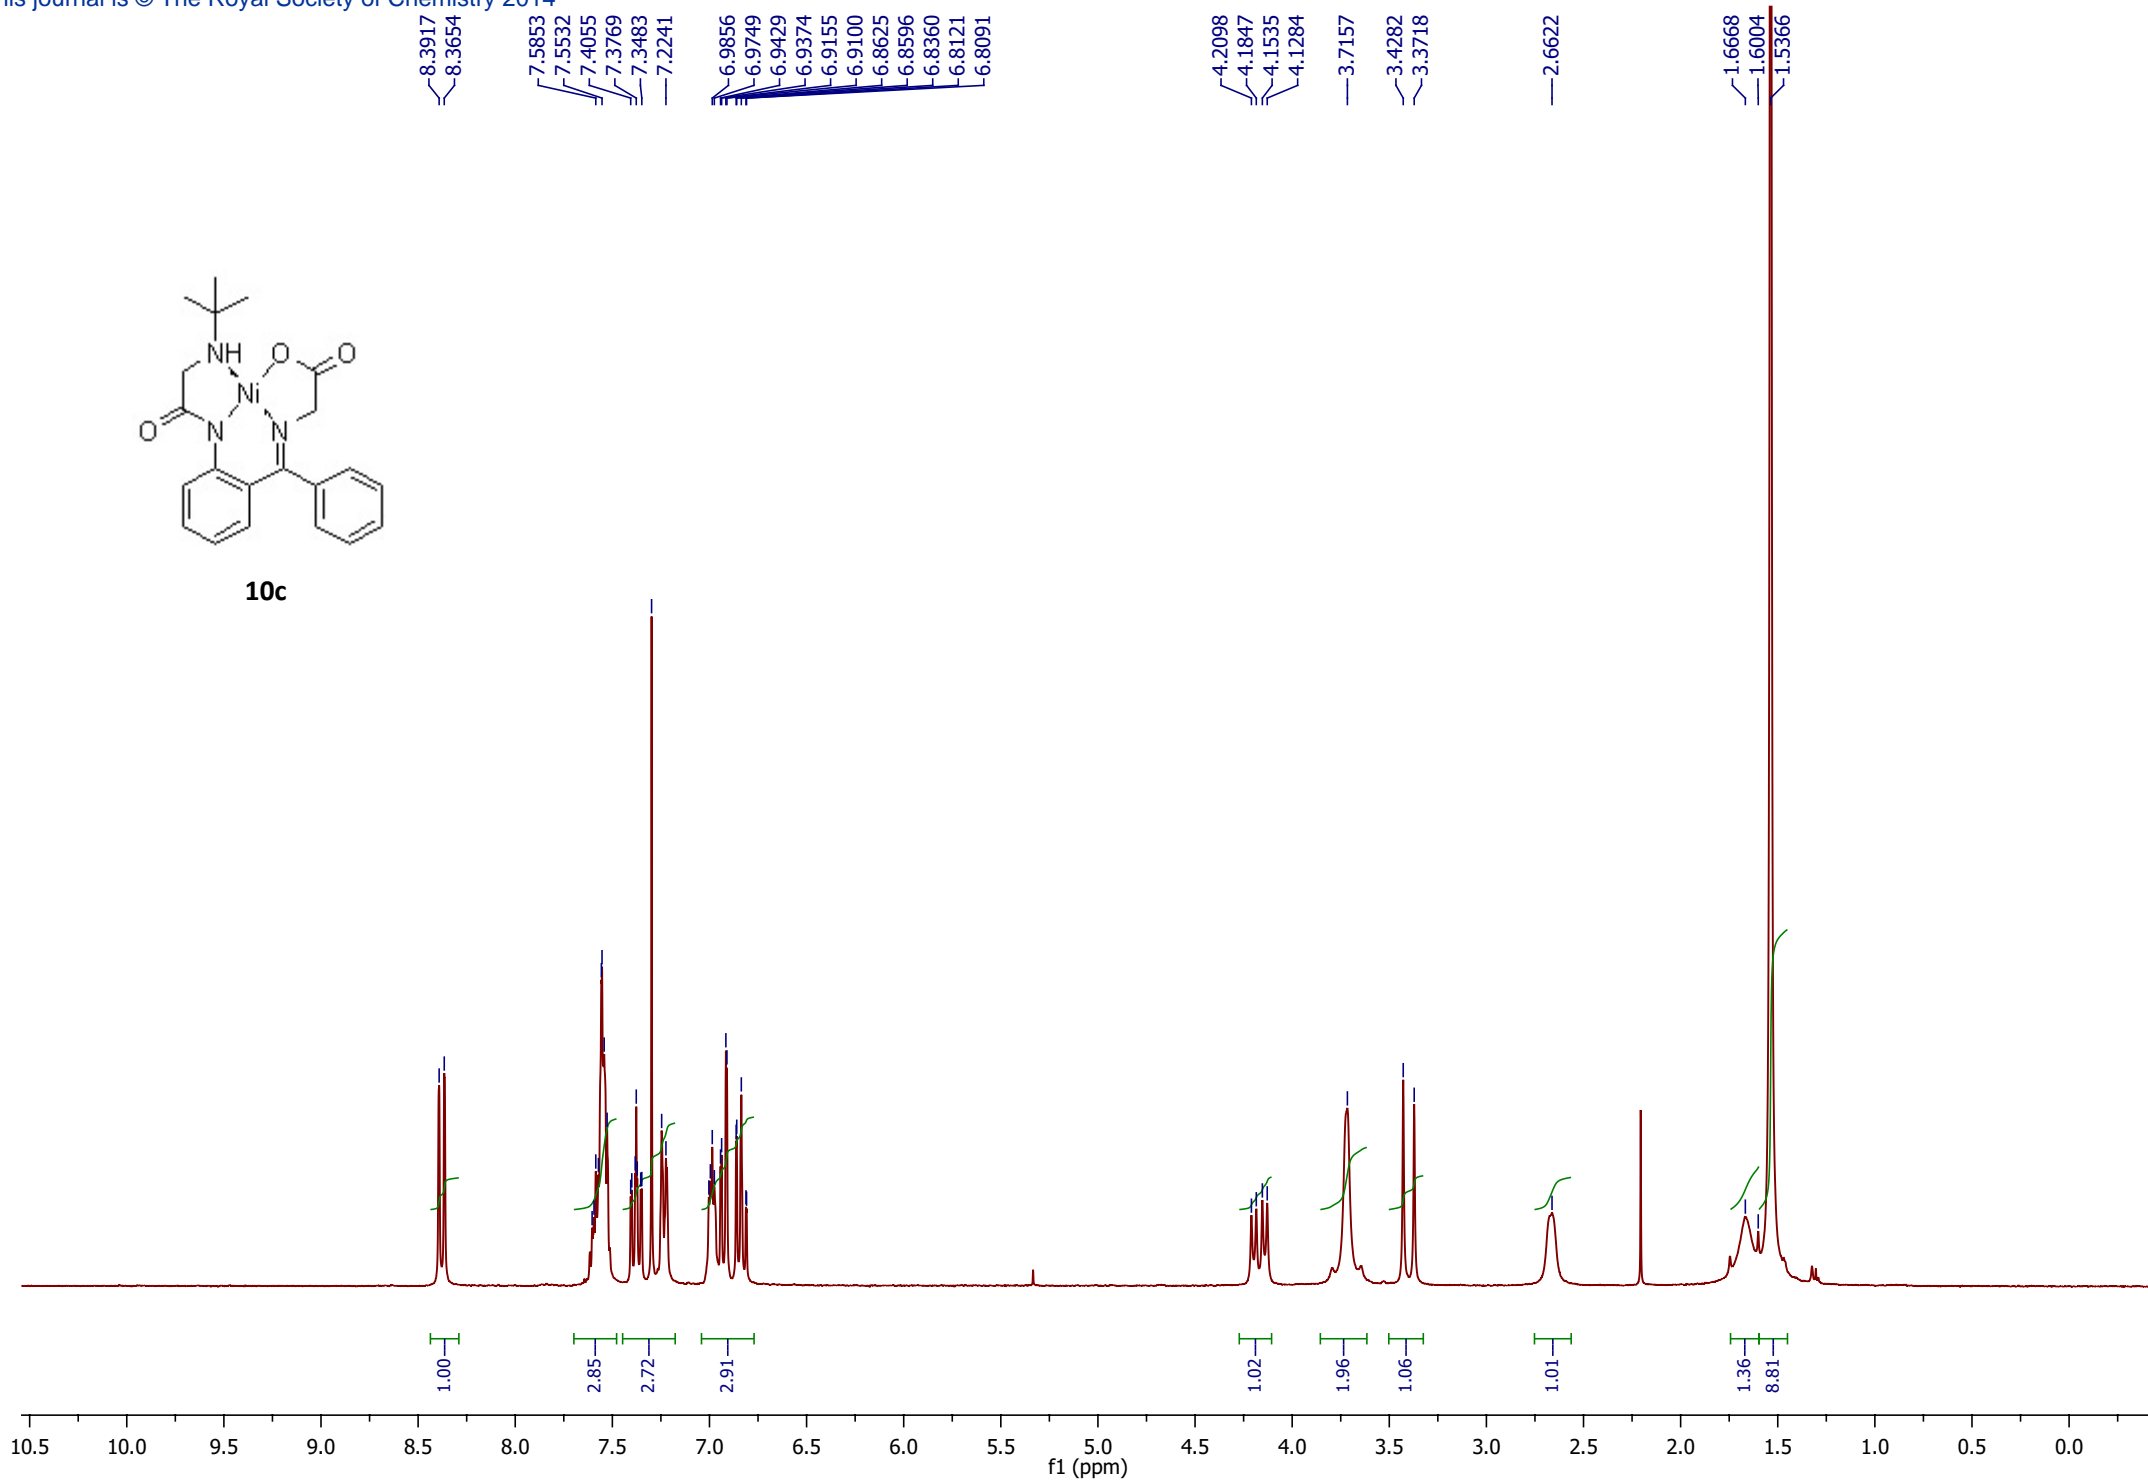



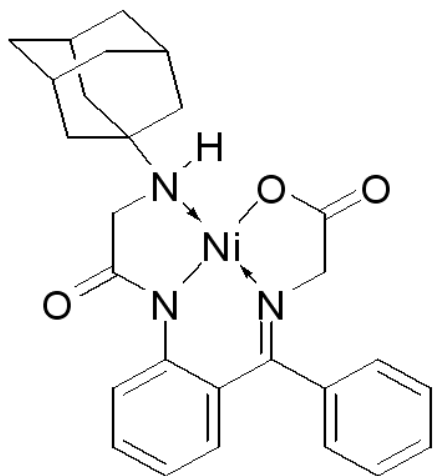

10d

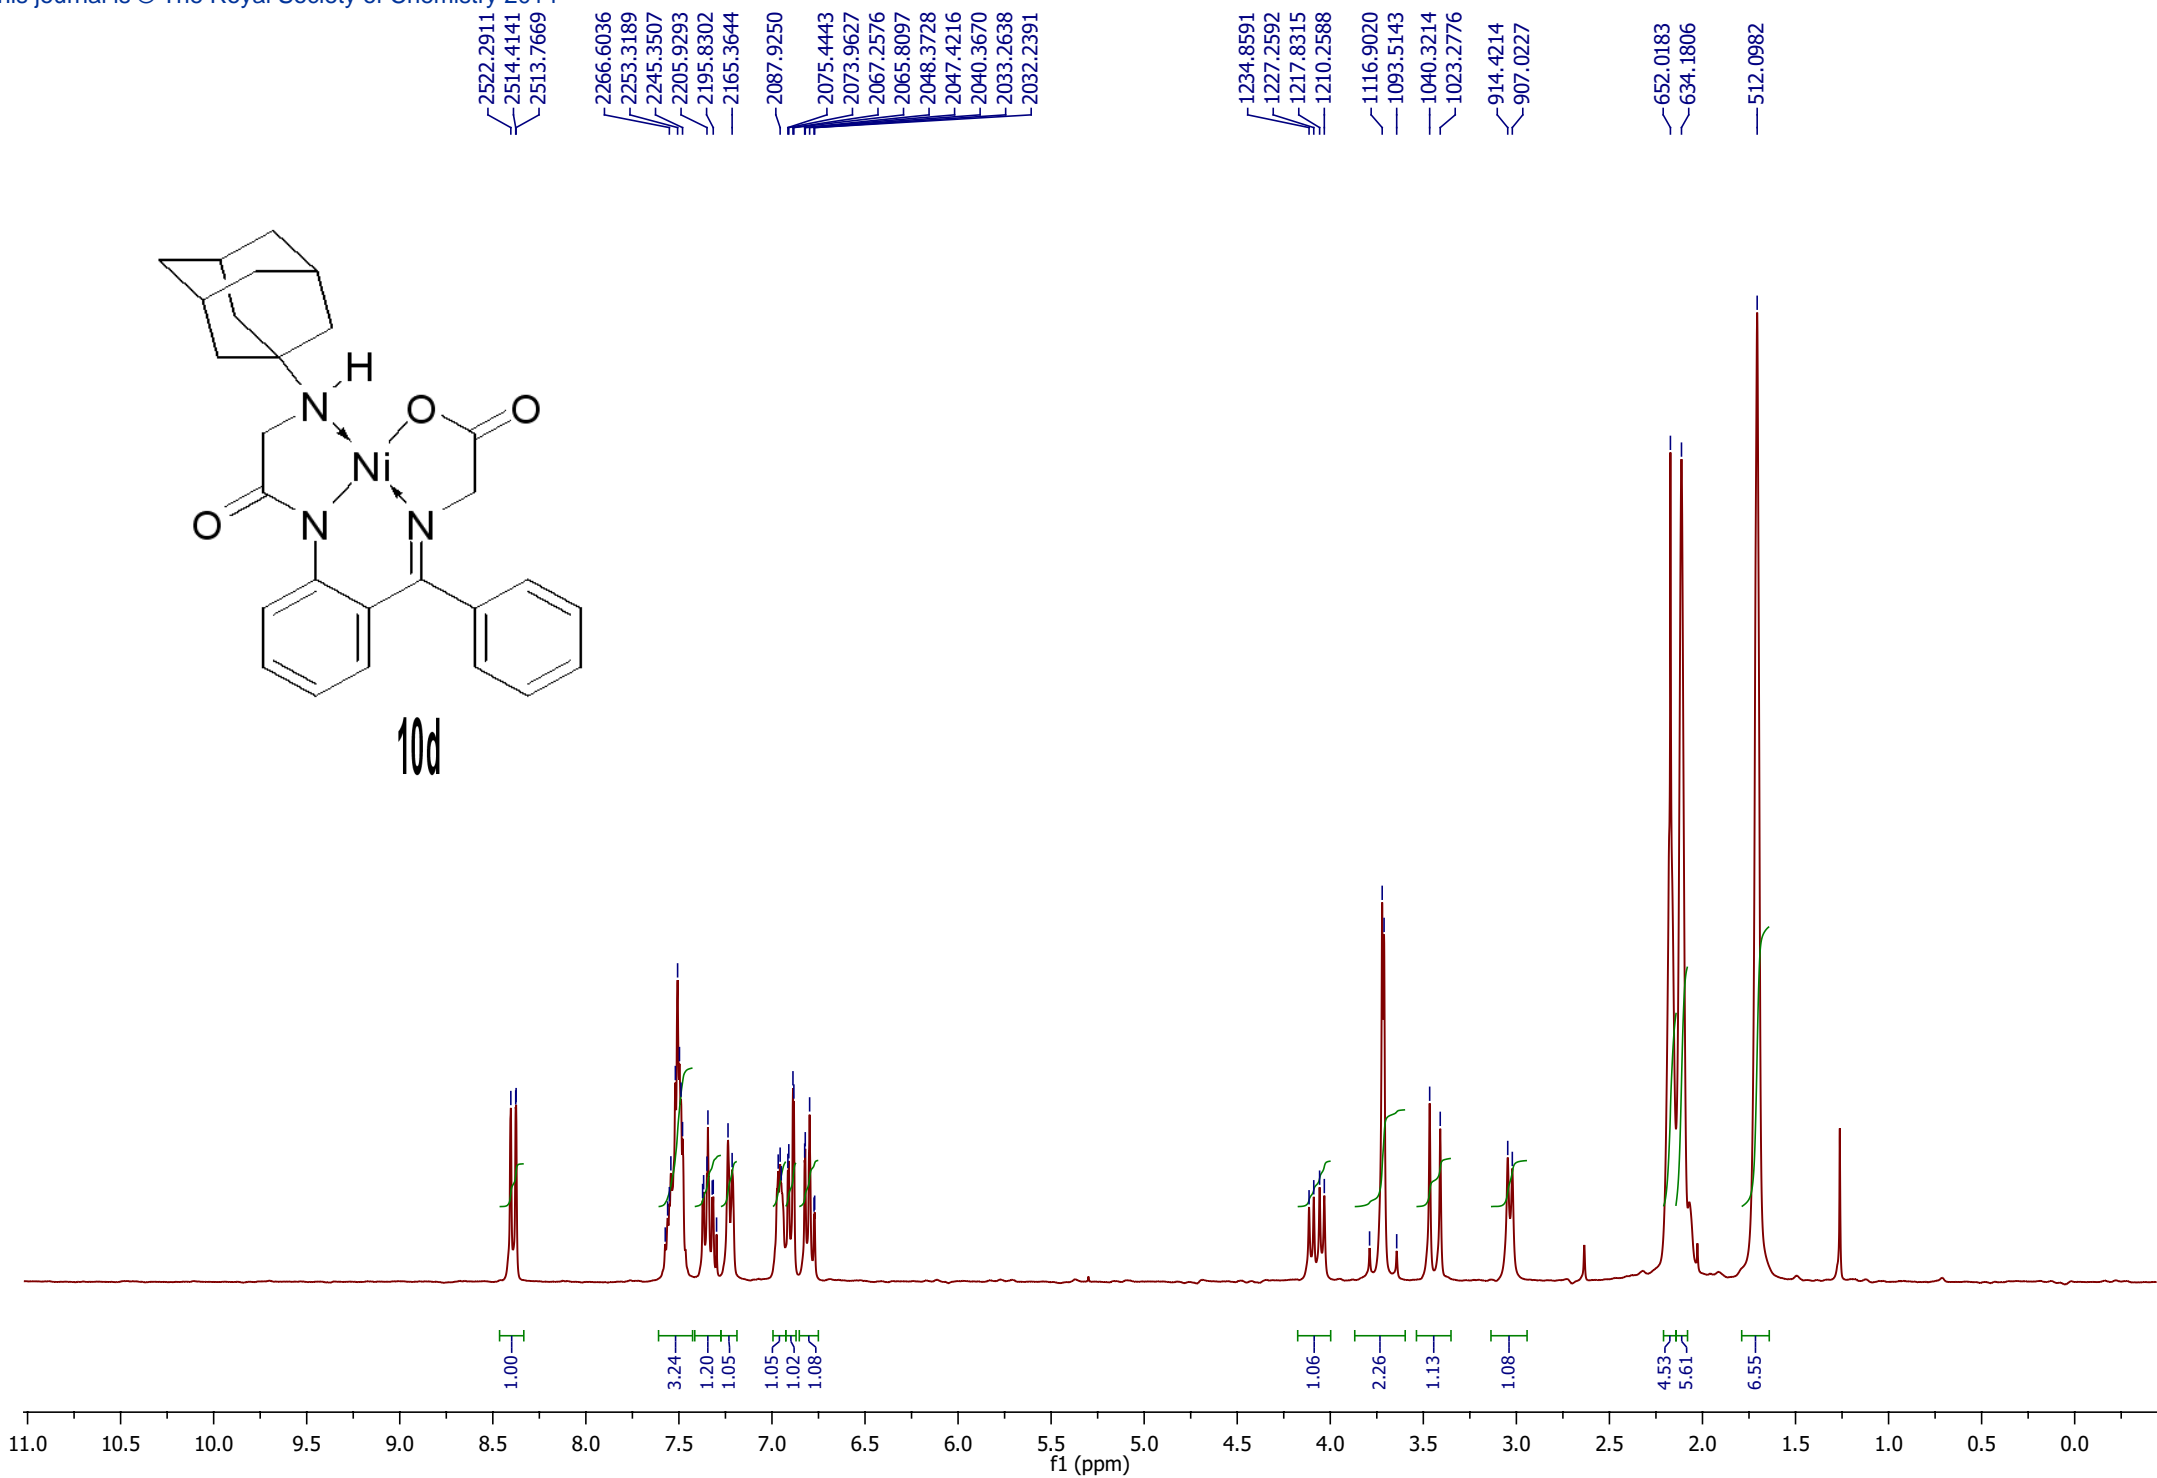

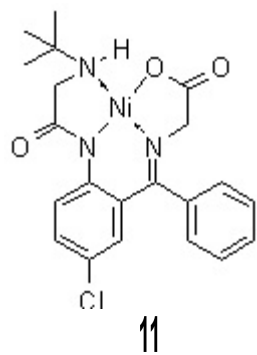

8.3953  
8.3649

7.5724  
7.5630  
7.5536  
7.5462

7.2107

6.9781  
6.9718  
6.9628  
6.9497  
6.8573  
6.8489

4.1971  
4.1722  
4.1404  
4.1155

3.6703

3.3871  
3.3302

2.9820

1.5667  
1.5114

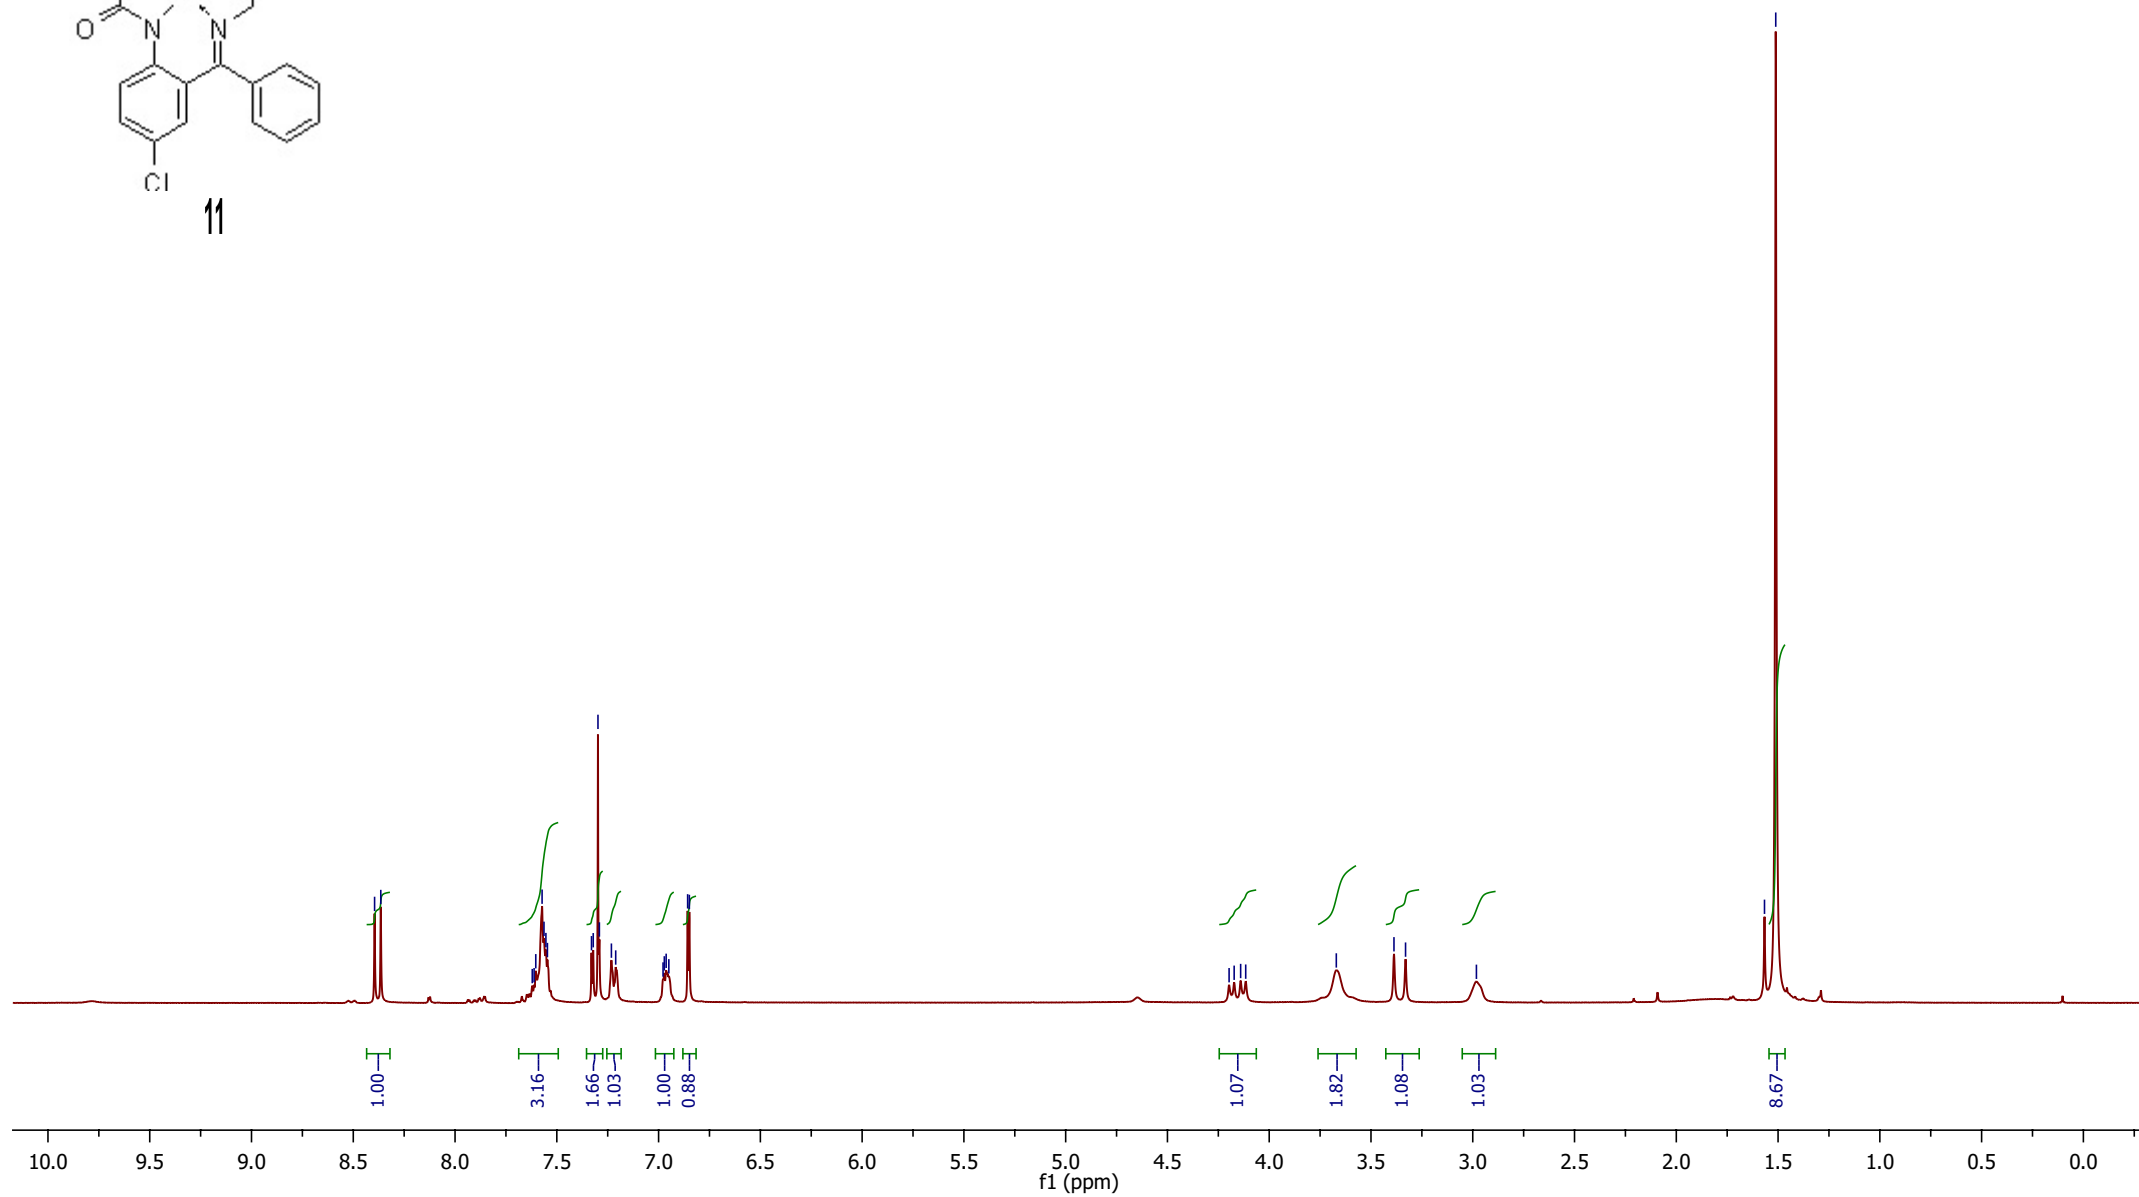

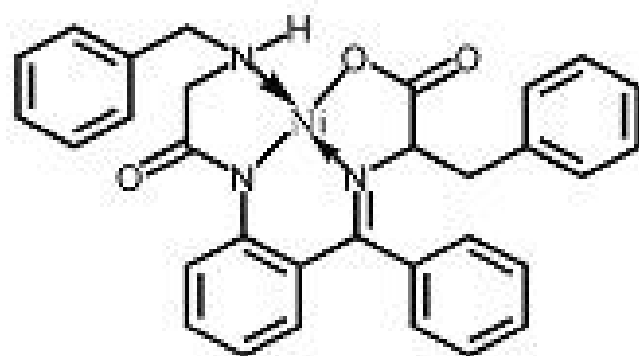

12

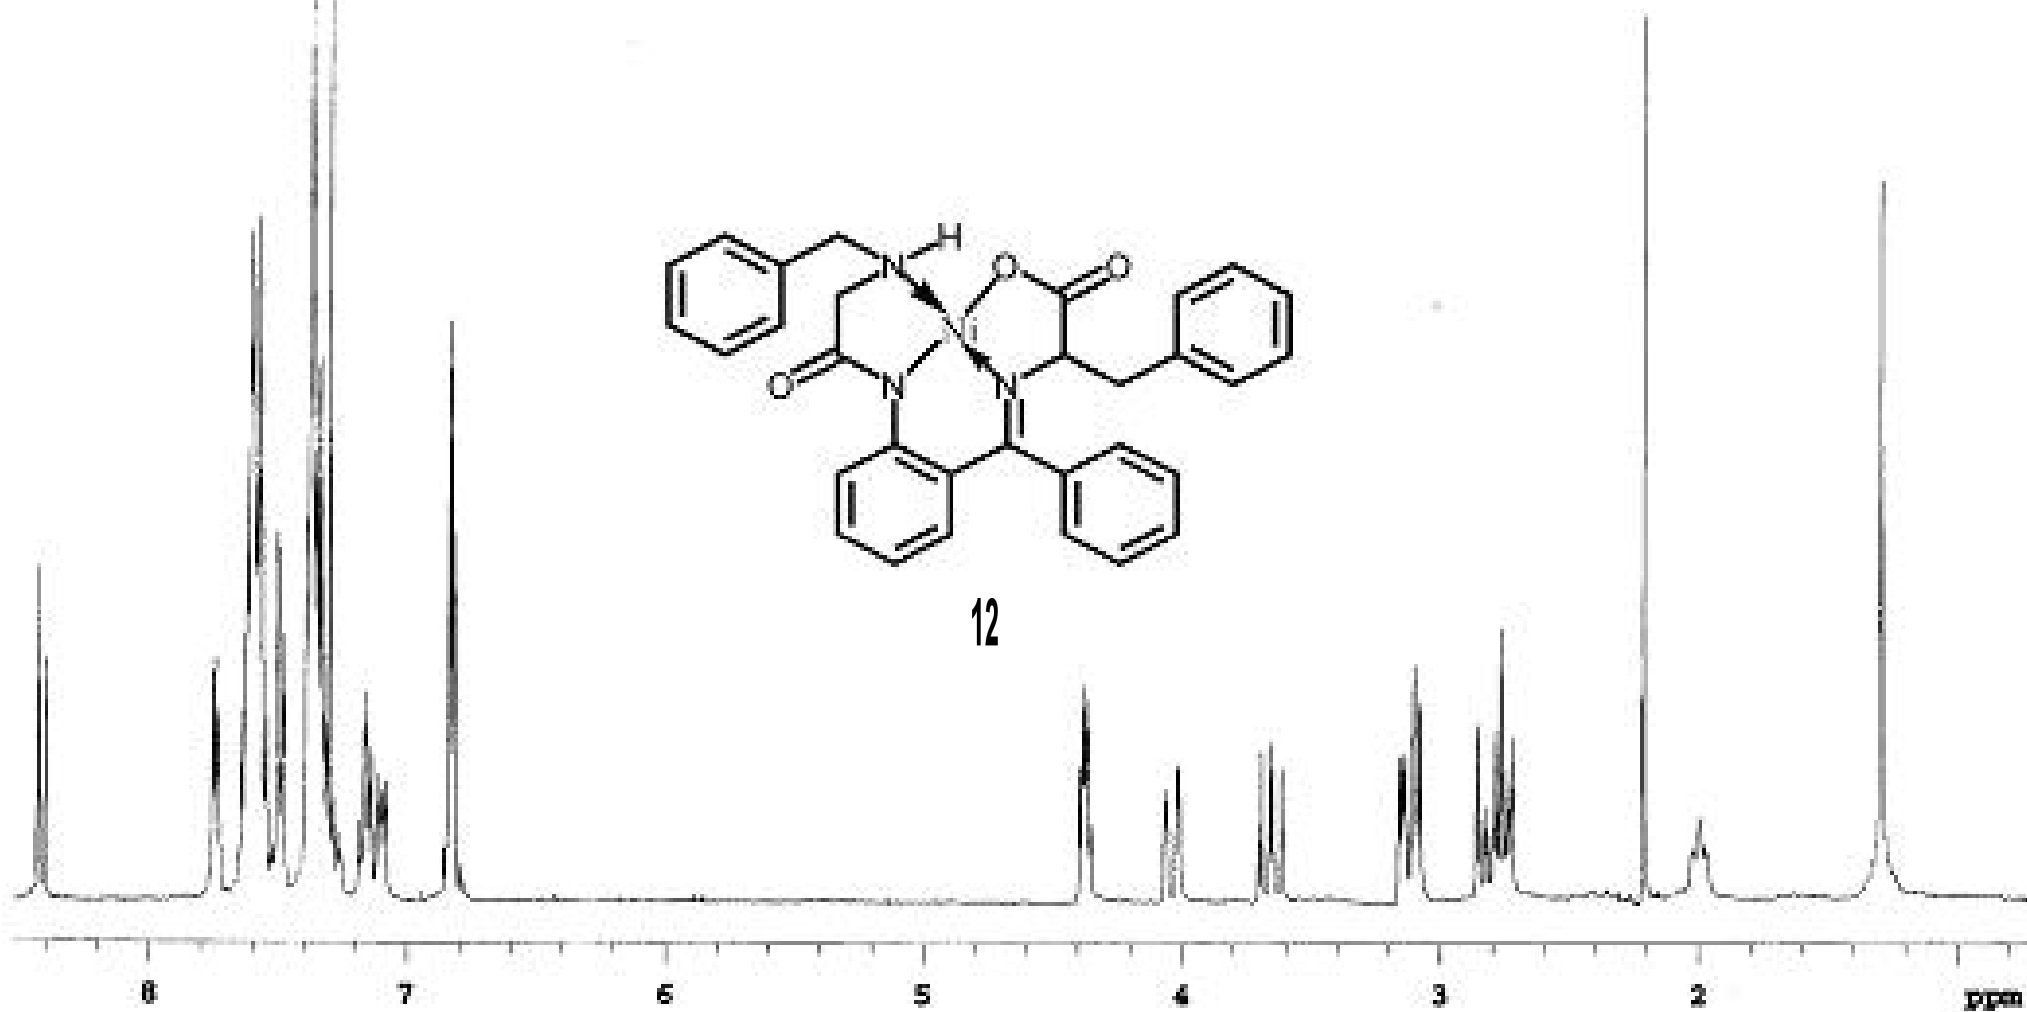

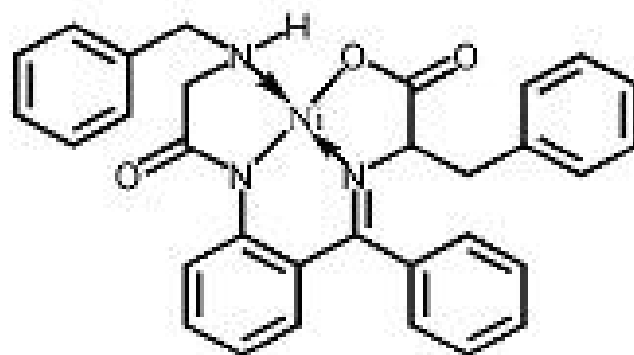

13

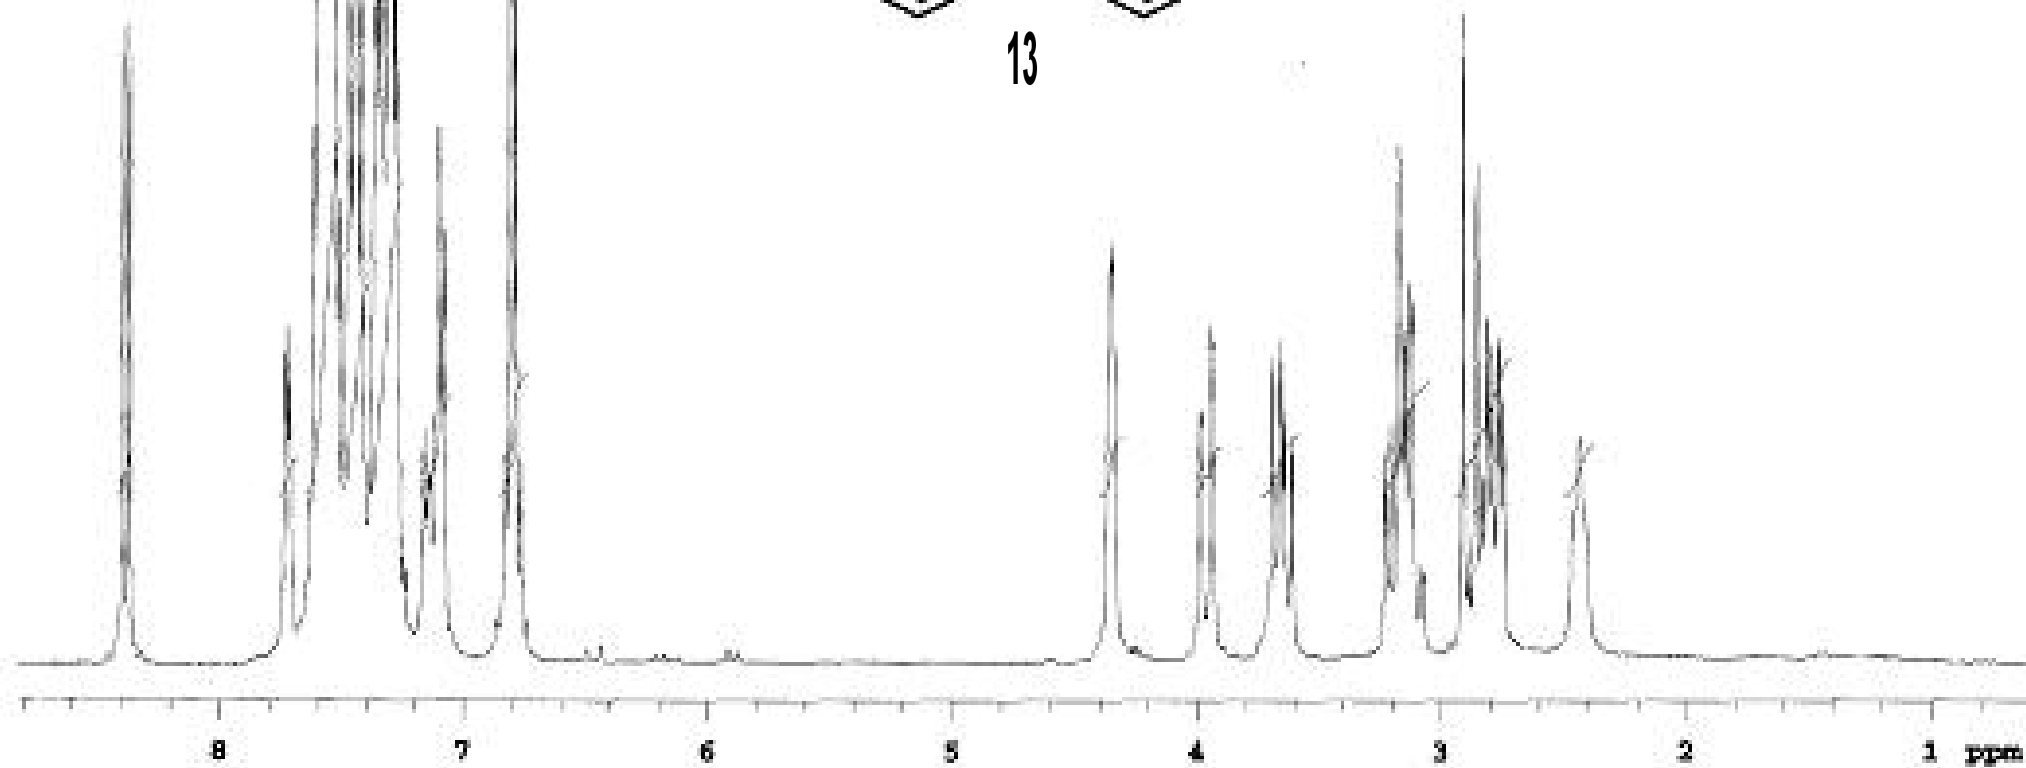

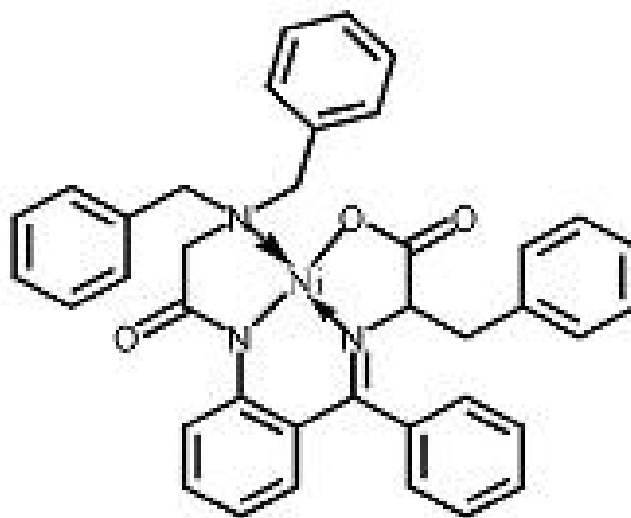

14

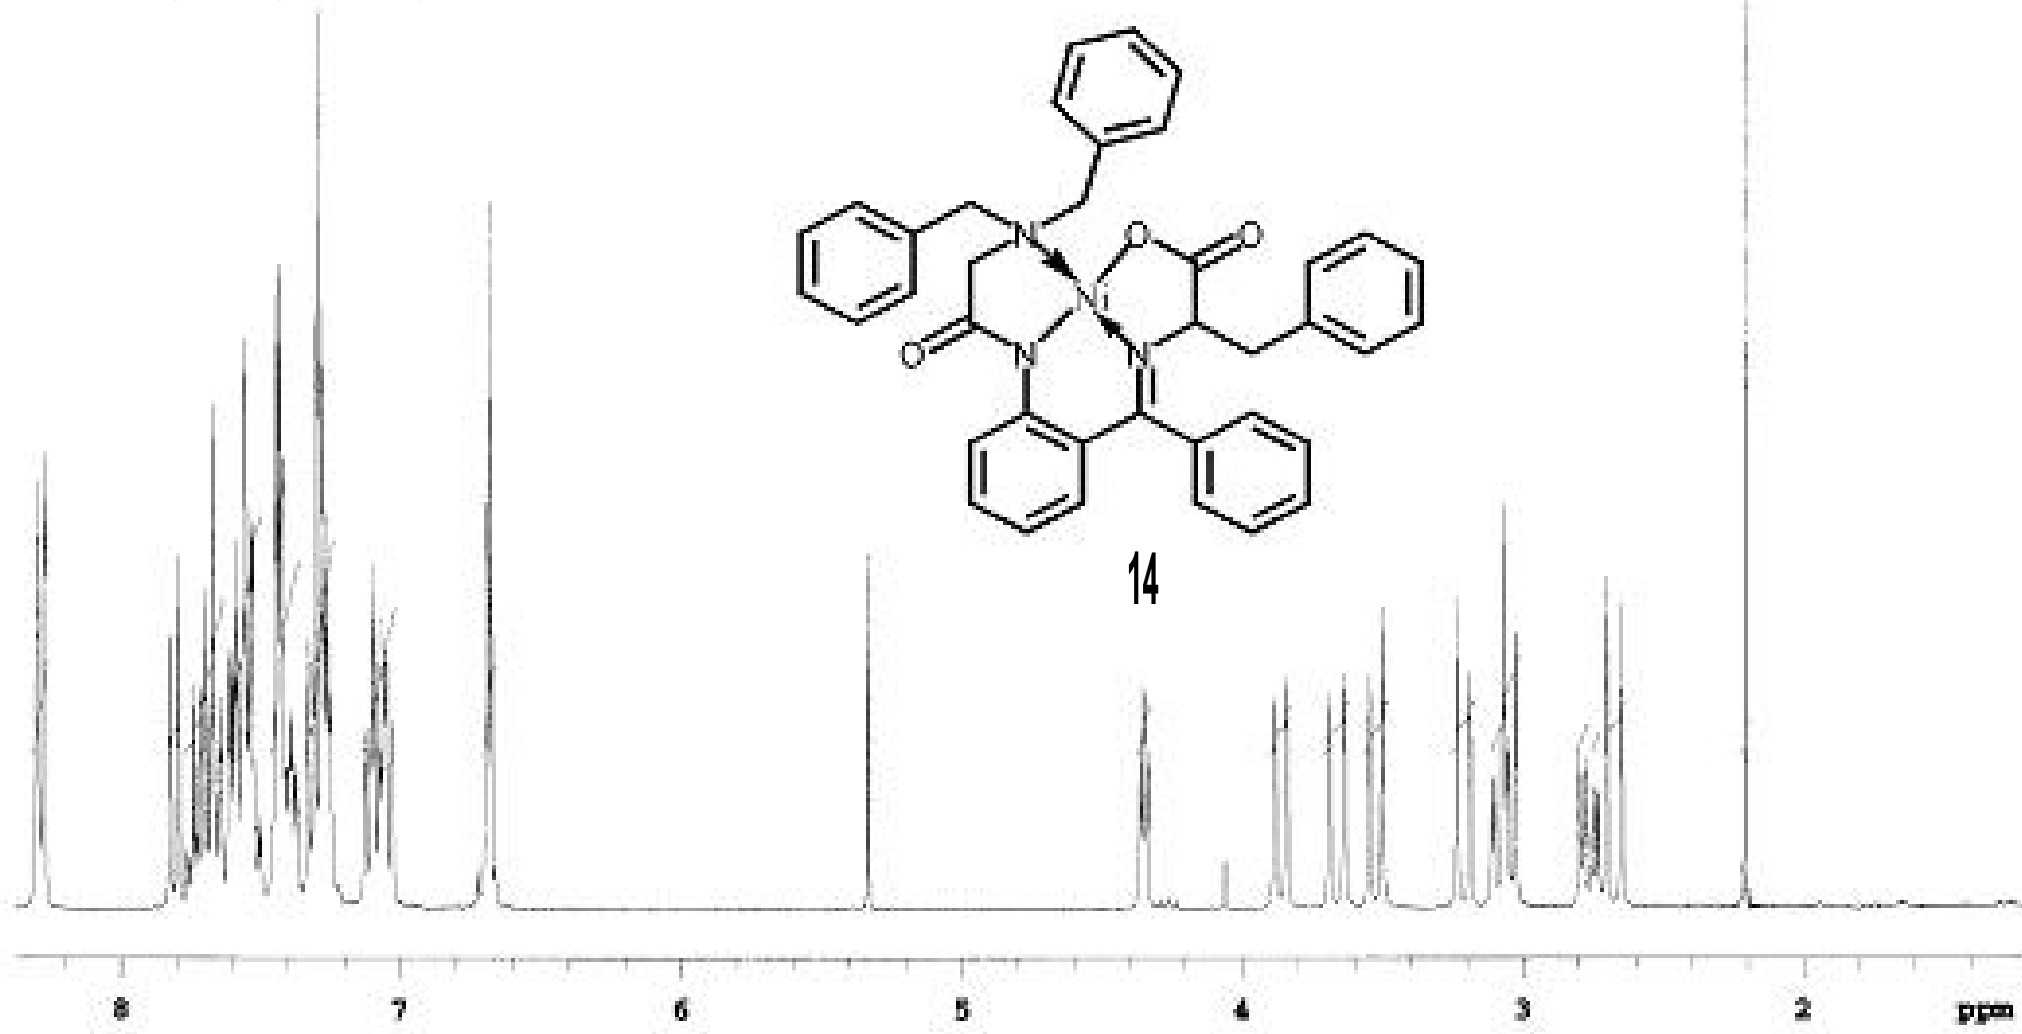

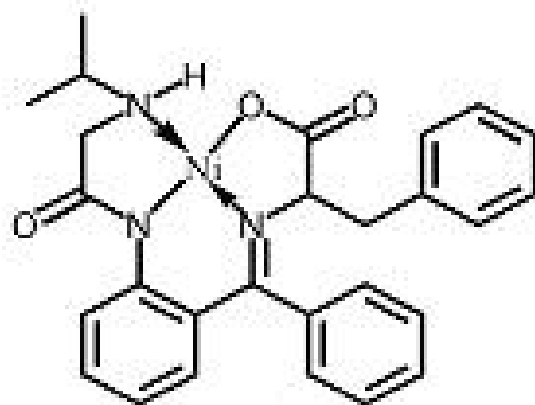

16

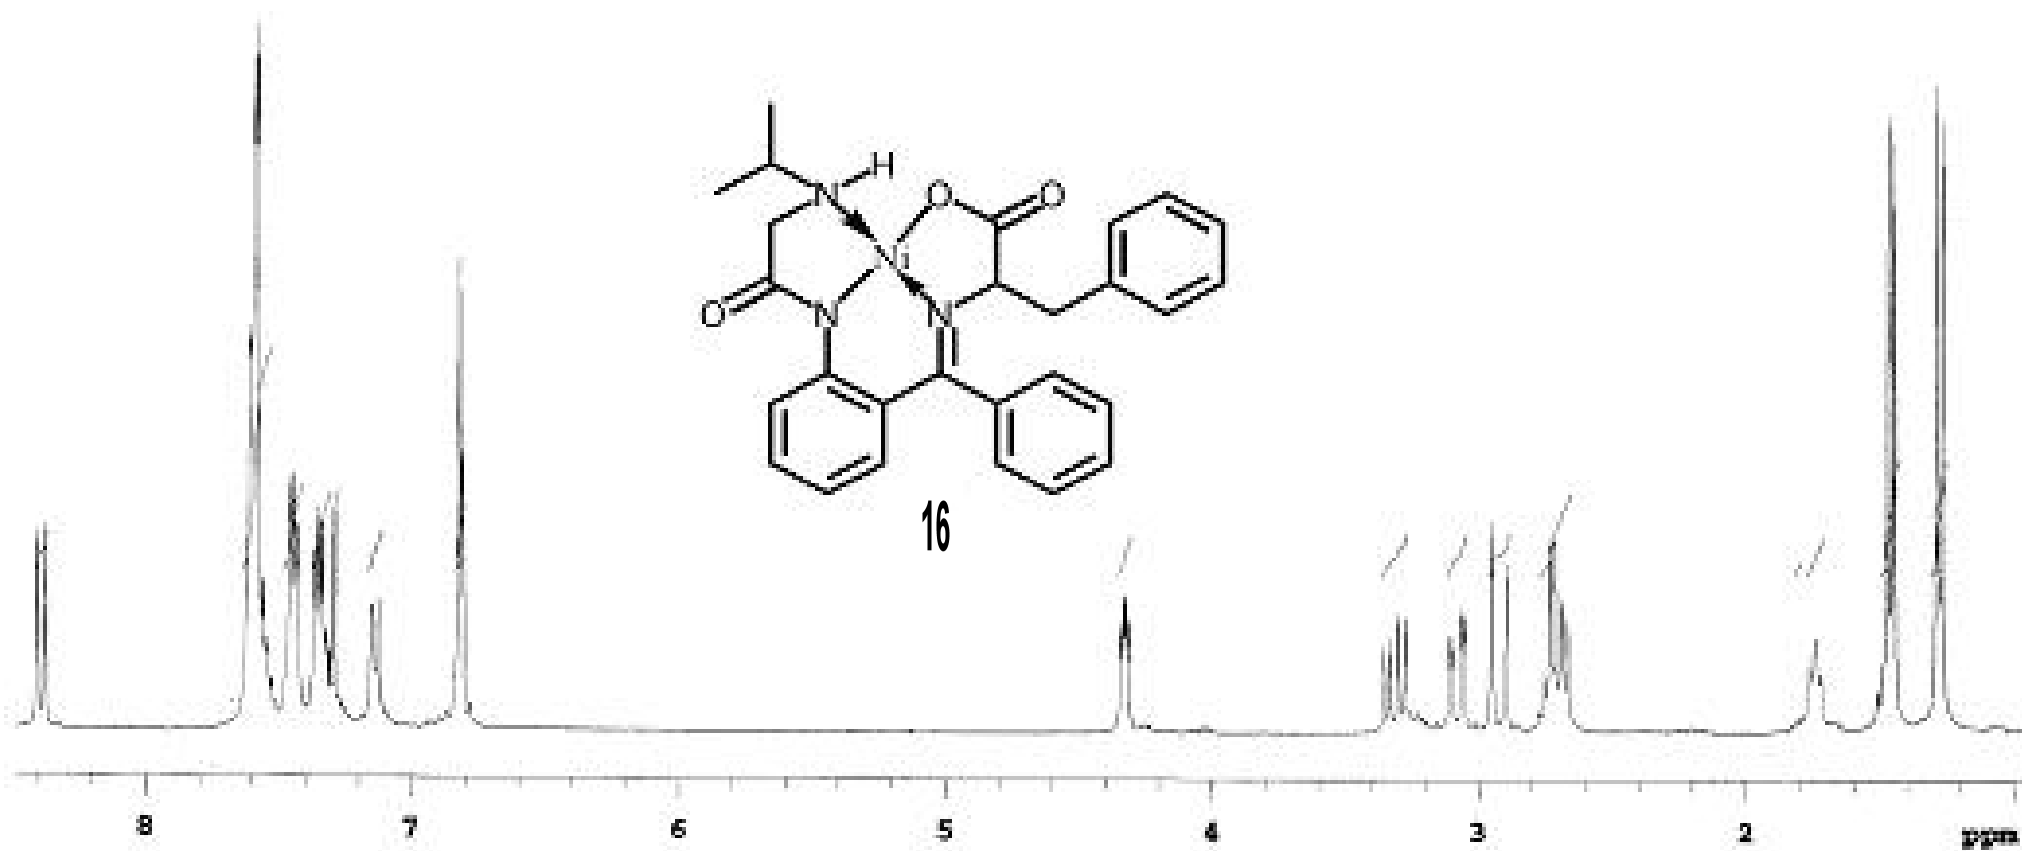

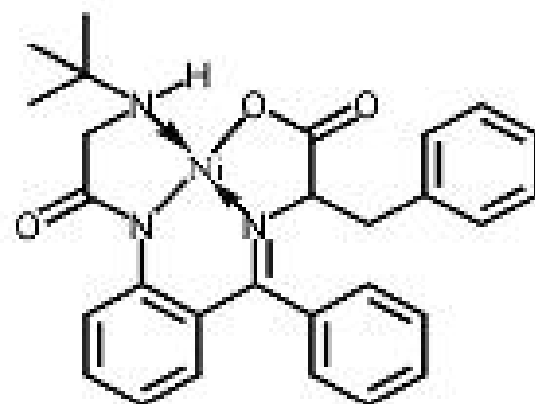

17a

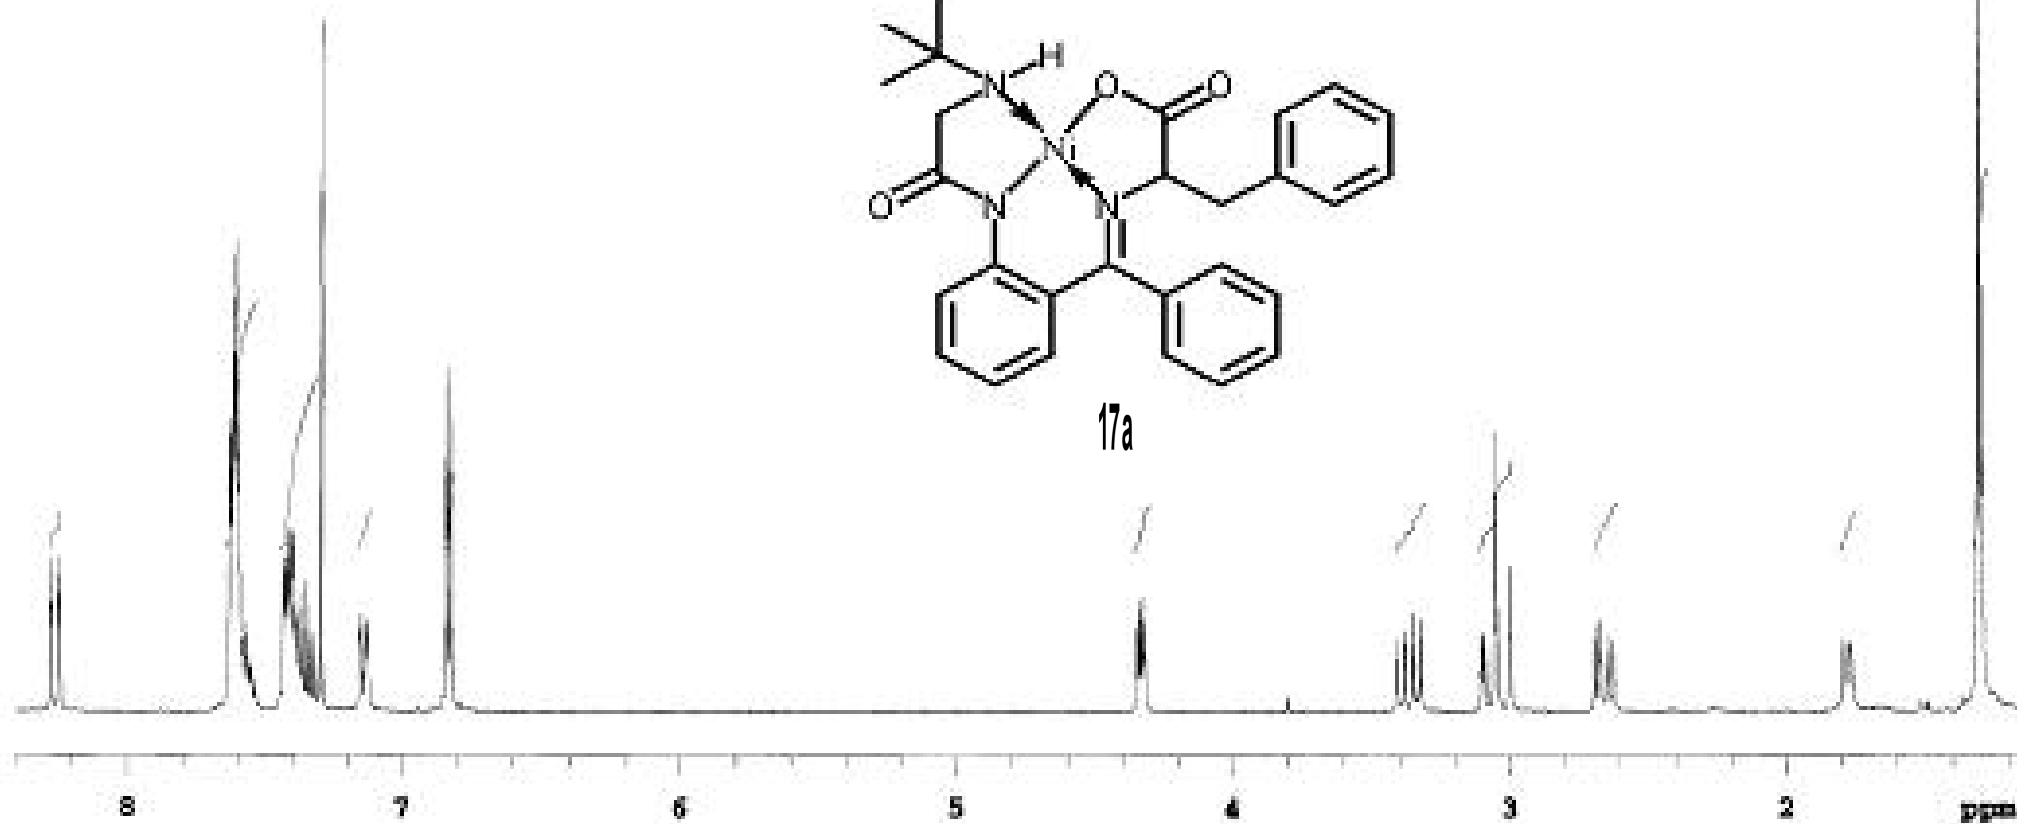

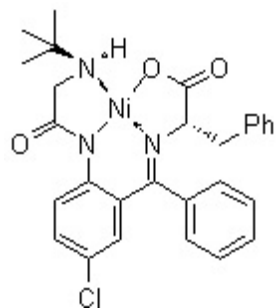

18

8.2733  
8.2430

7.6284  
7.6051  
7.5812  
7.5610  
7.4052

7.2894  
7.1437  
7.1157

6.7730  
6.7646

4.3246  
4.3148  
4.3061  
4.2962

3.3943  
3.3696  
3.3389  
3.3142

3.0632  
2.9752

2.6734  
2.6546  
2.6283  
2.6095

1.9626  
1.9384

1.2886

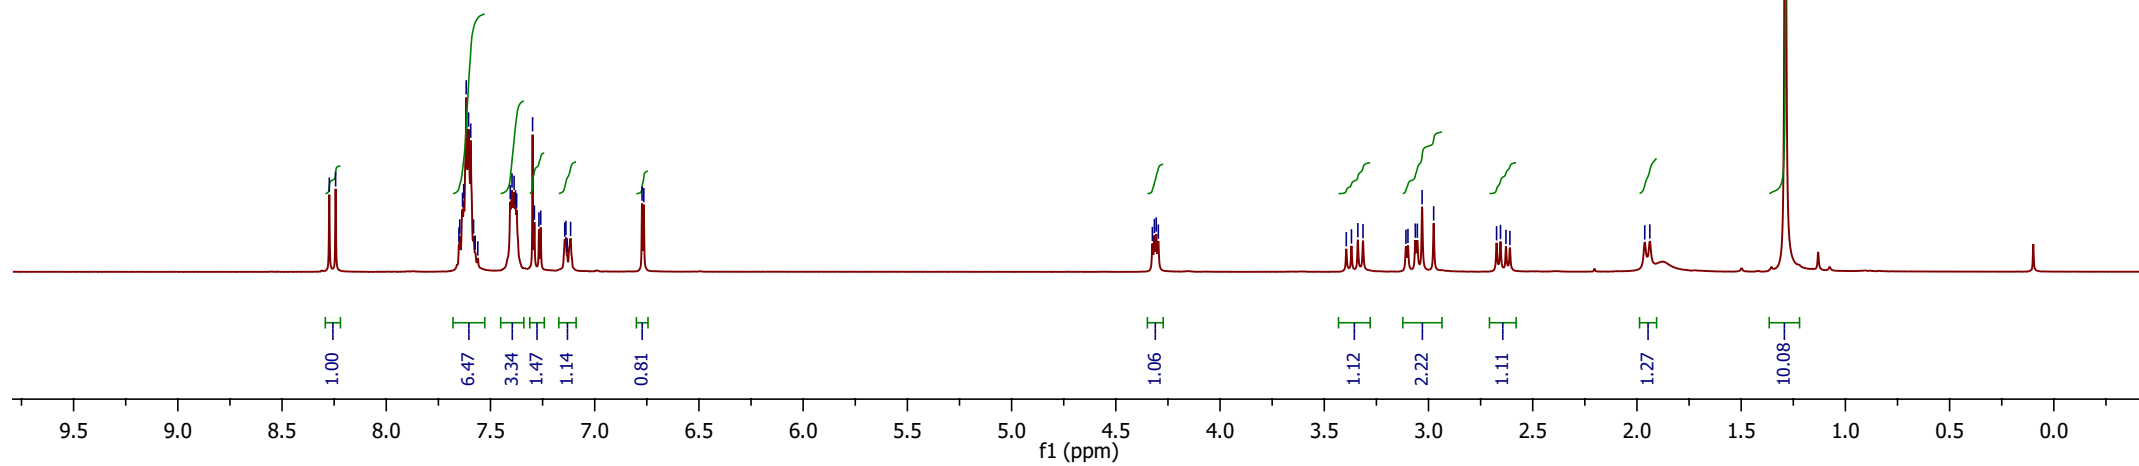



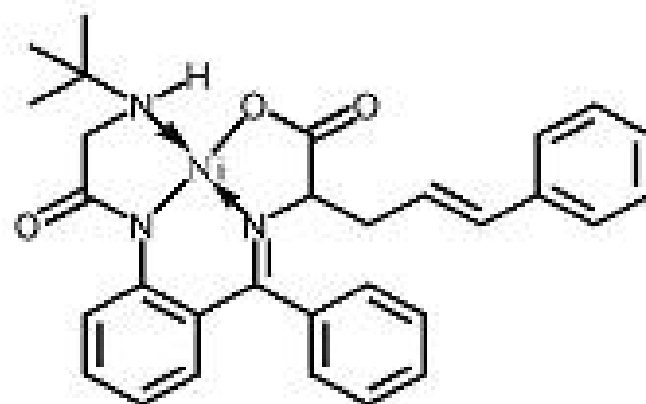

17c

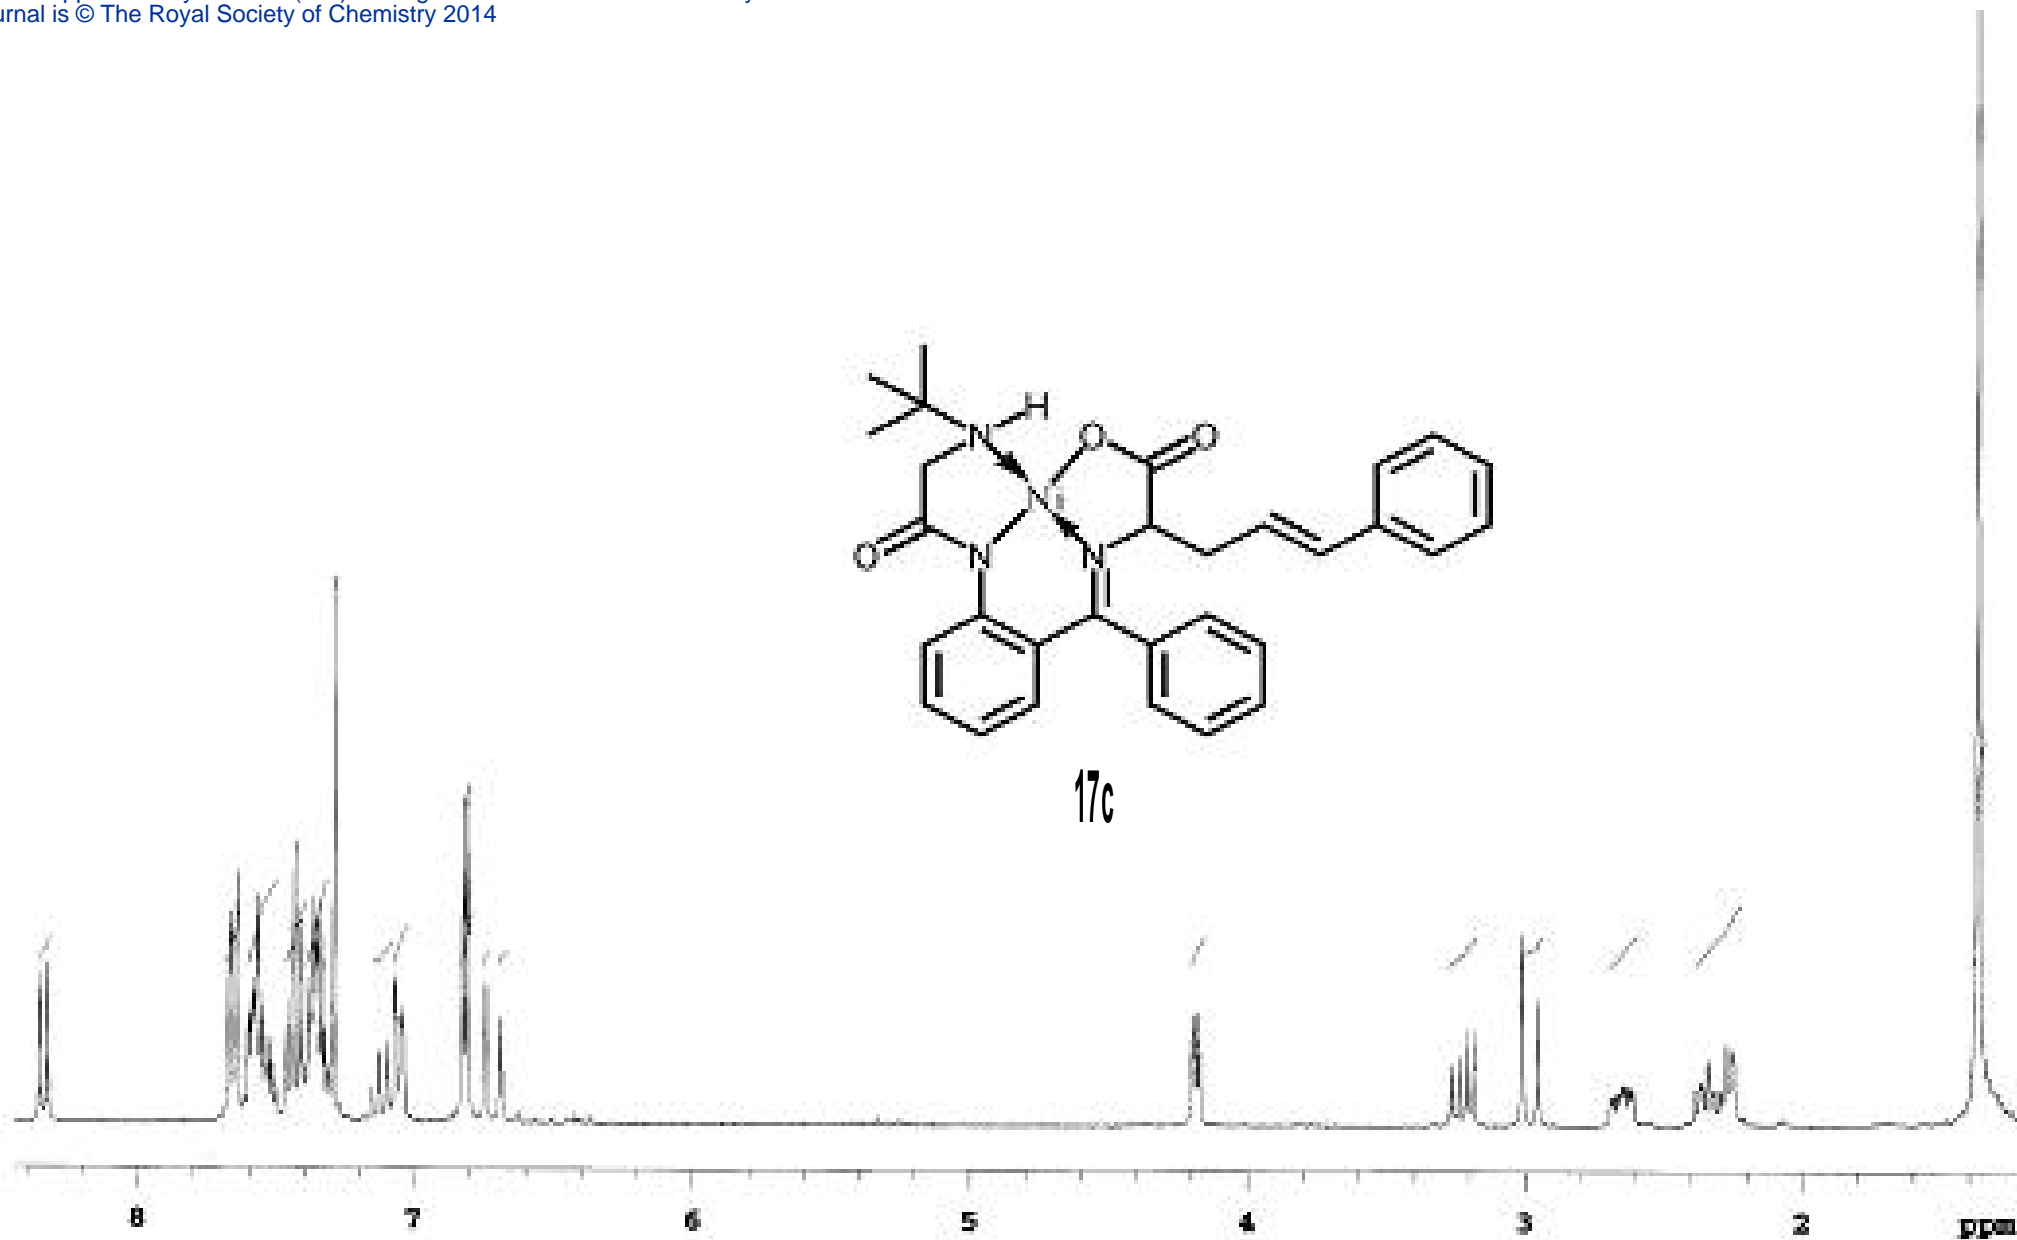

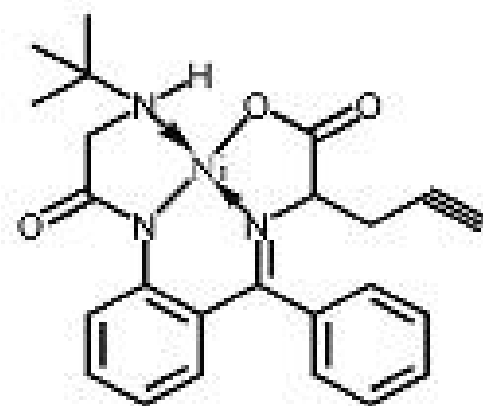

17d

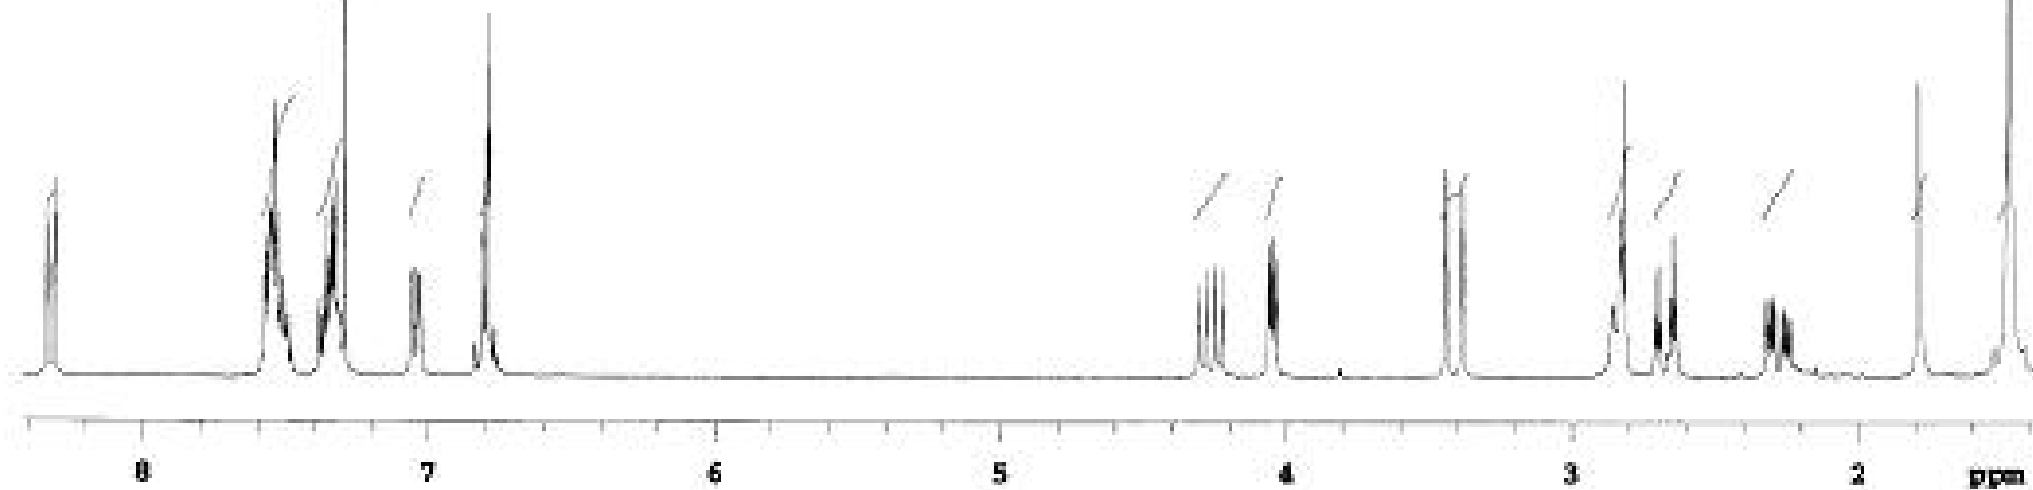

8.2959  
8.2677

7.5929

7.3982

7.3471

7.3310

7.2980

7.1249

6.8385

6.8264

4.3203

4.3123

3.1594

3.1035

3.0938

3.0848

3.0481

3.0399

2.6973

2.6788

2.6526

2.6339

2.1095

1.9489

1.8770

1.7818

1.7591

1.6865

1.6422

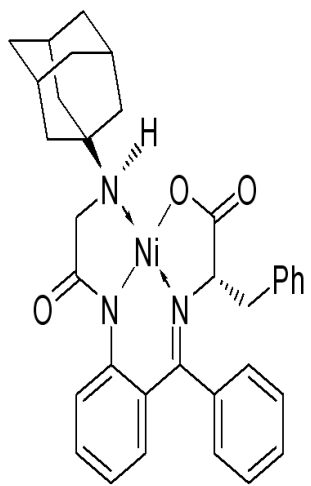

19a

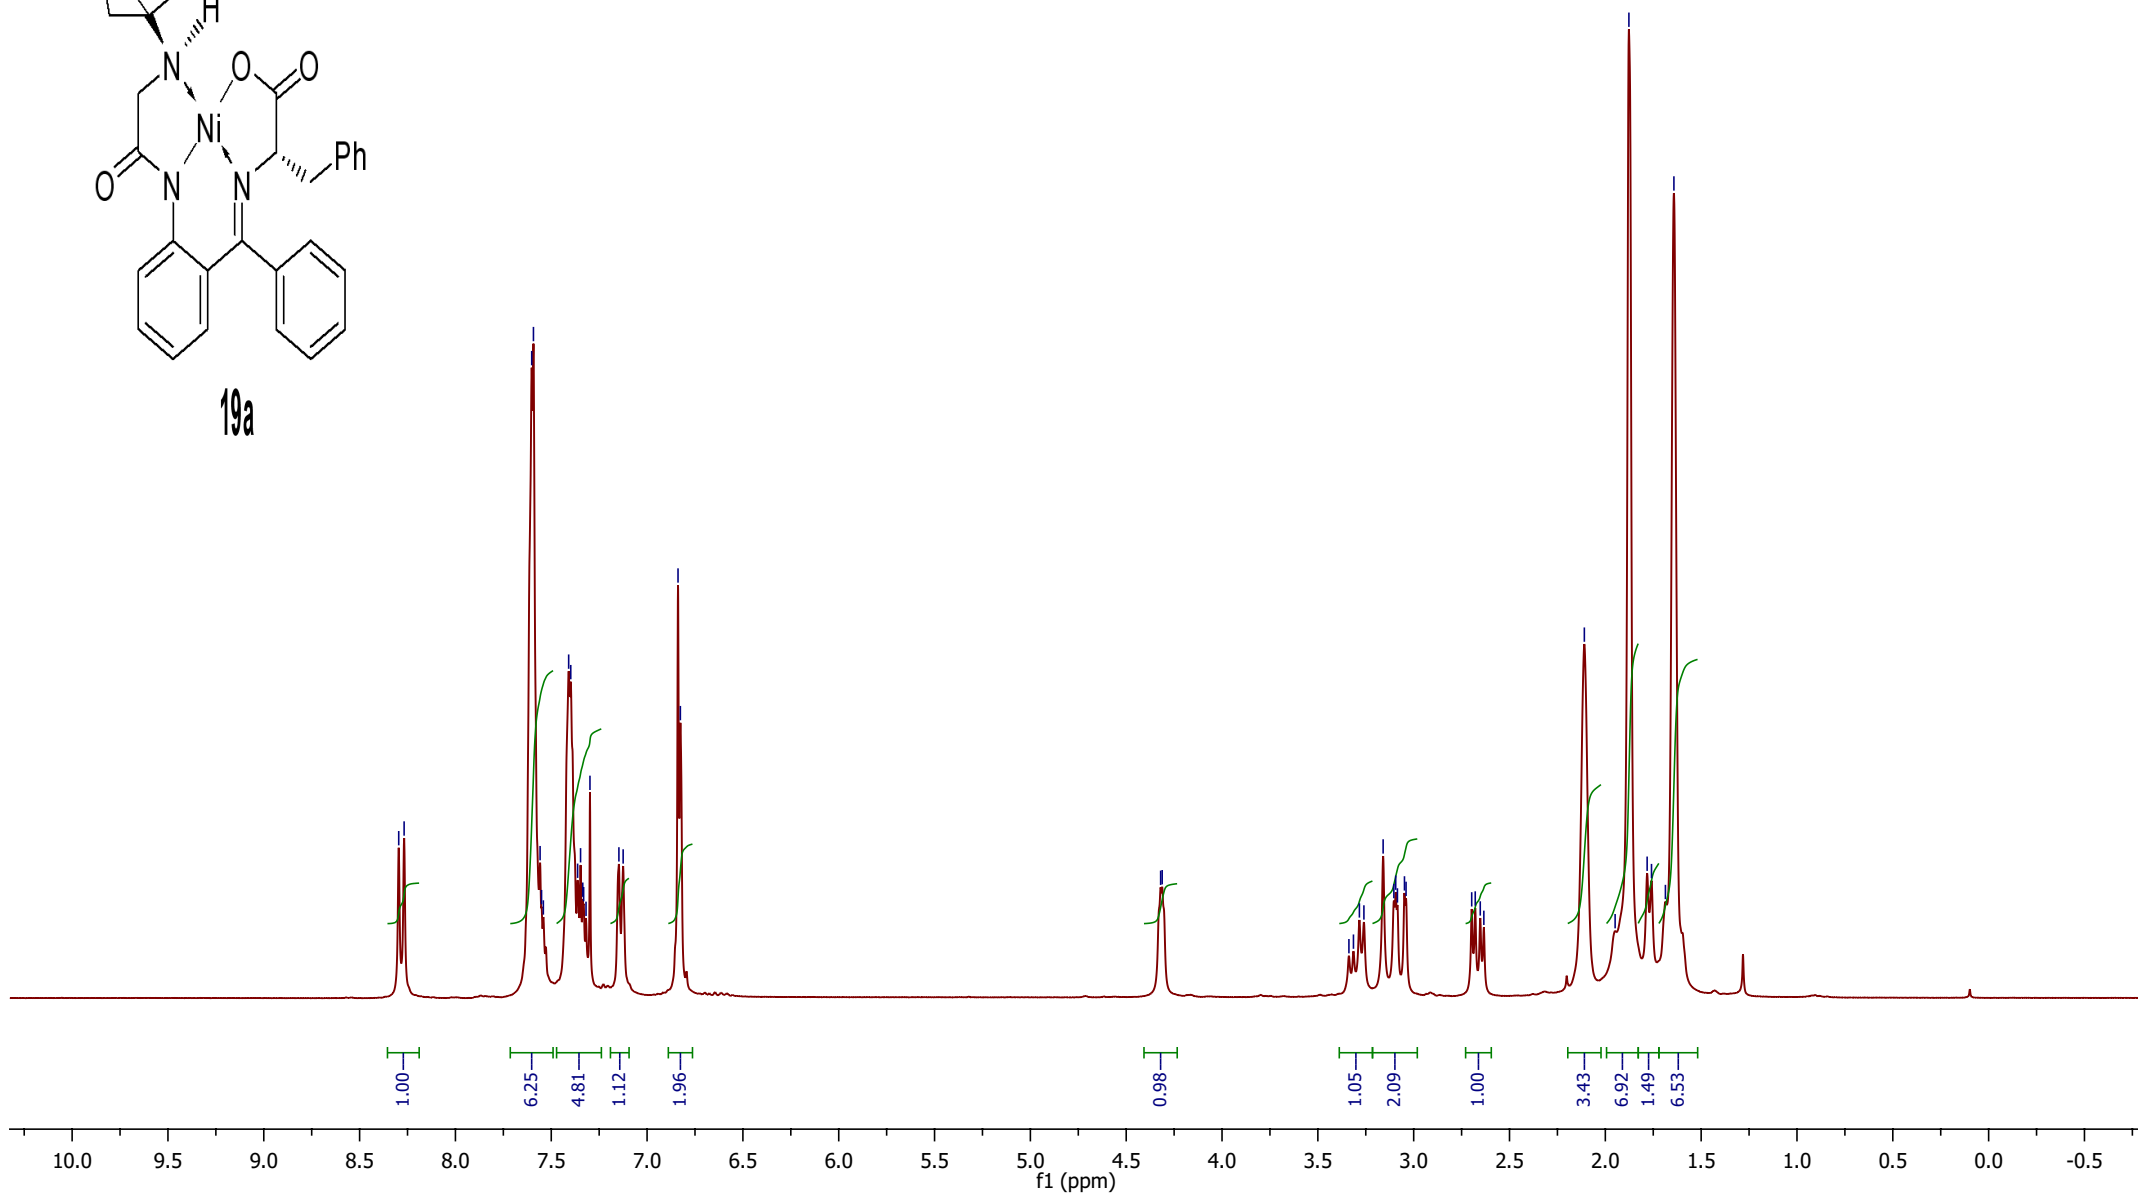

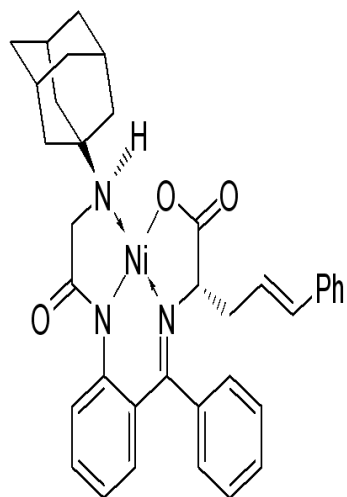

19b

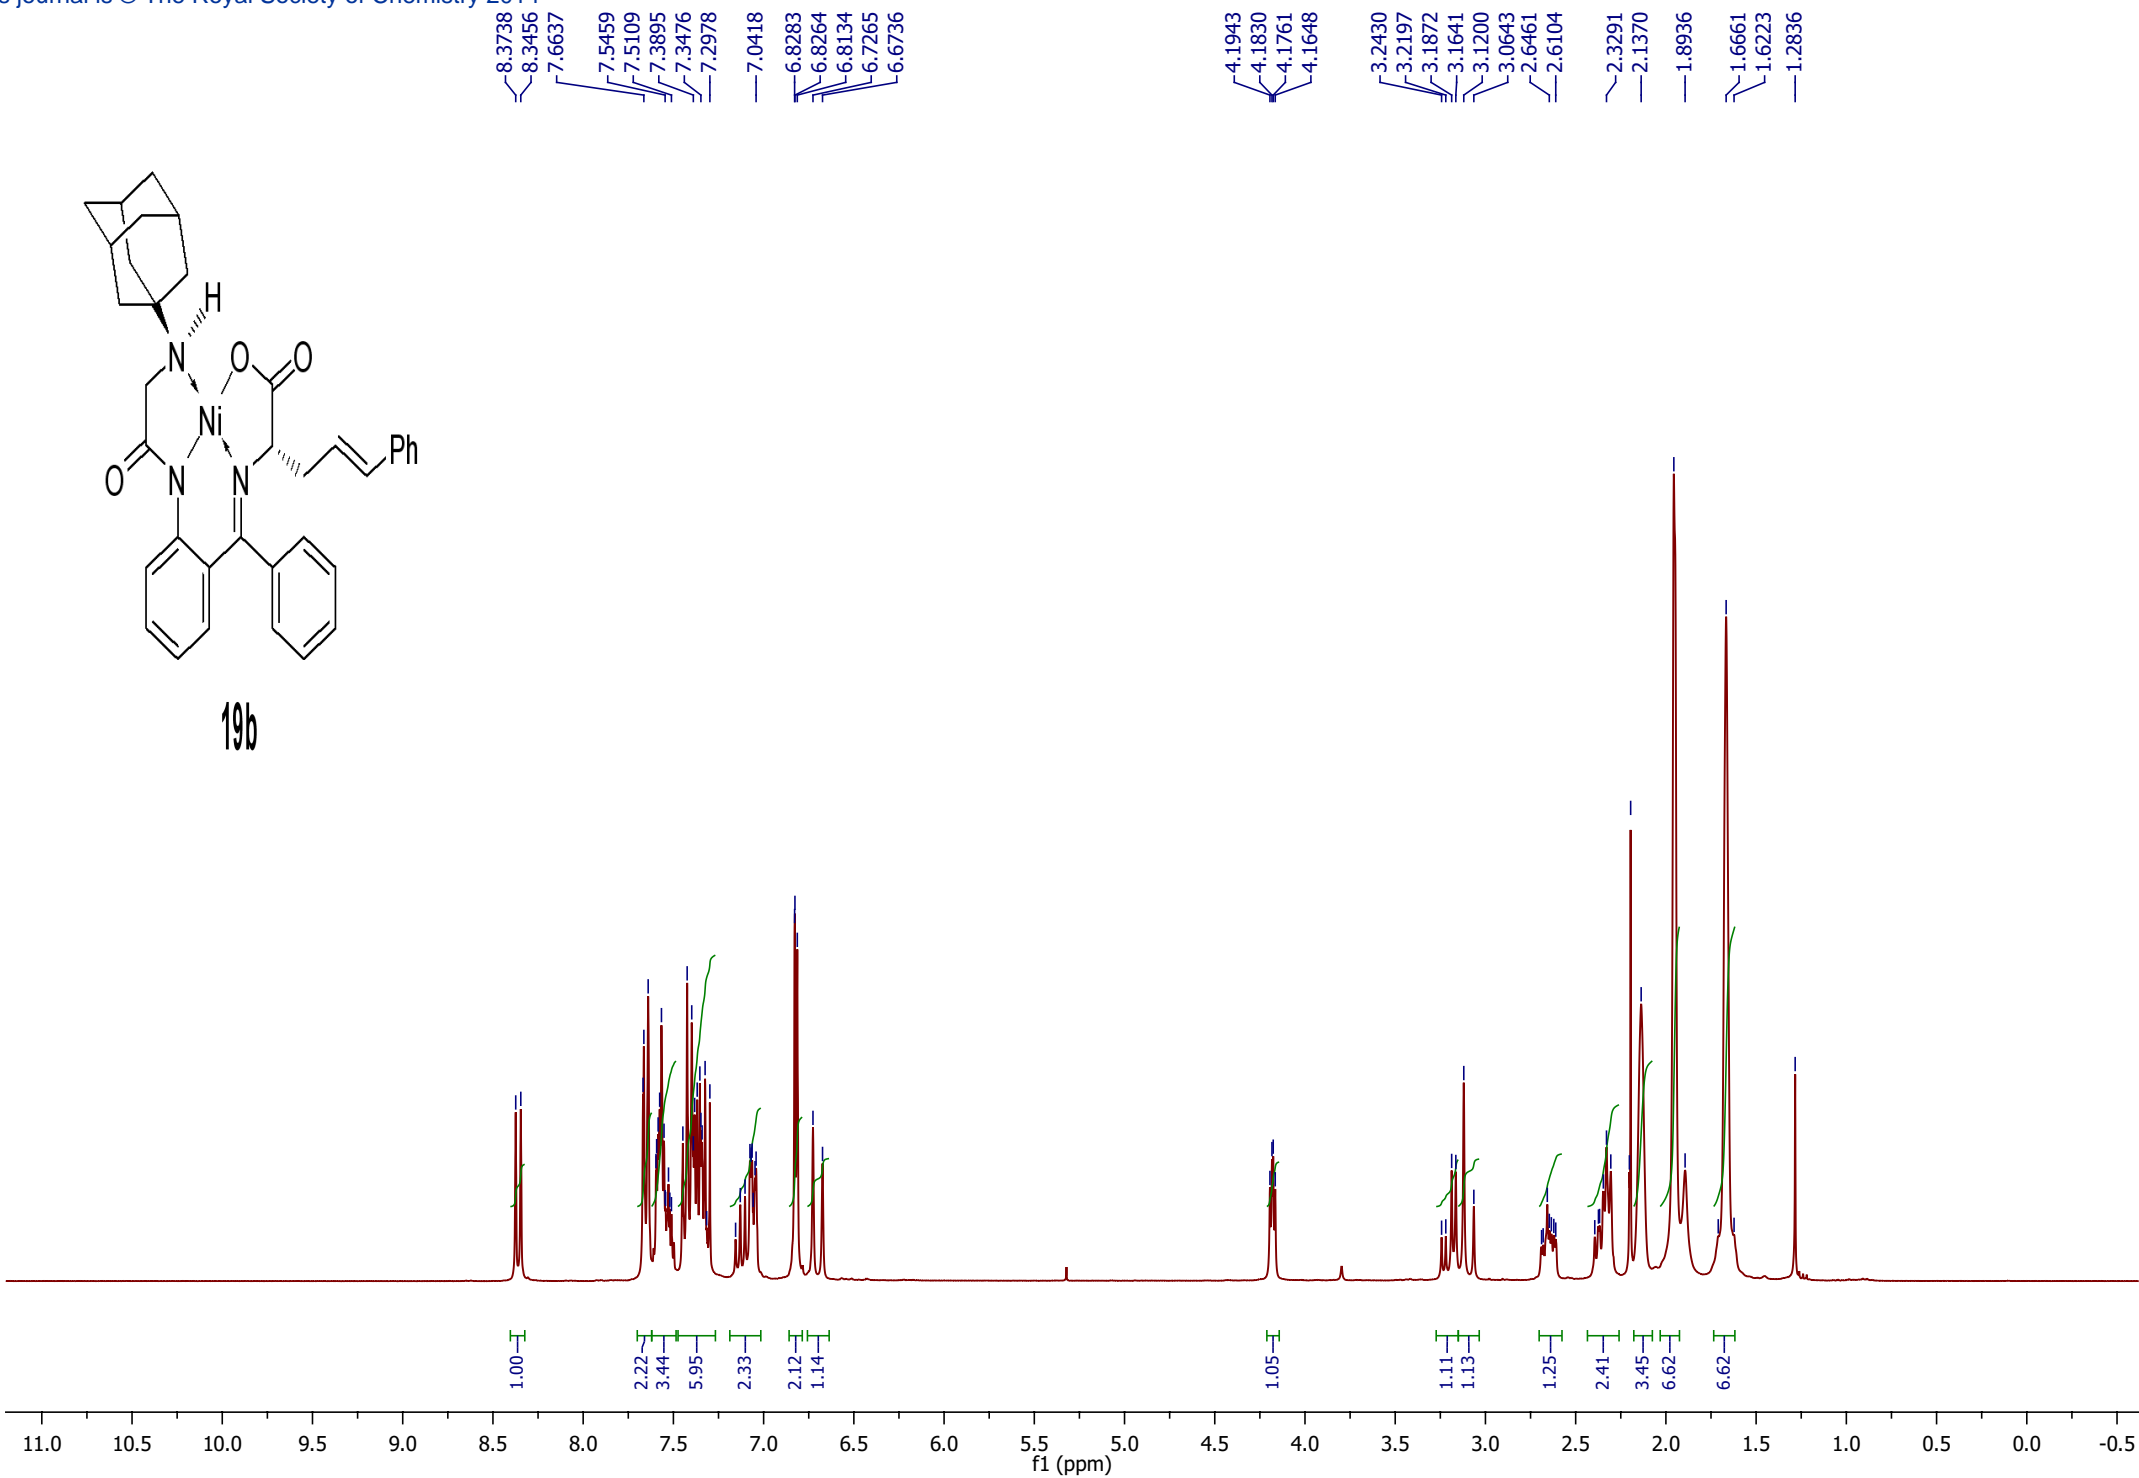

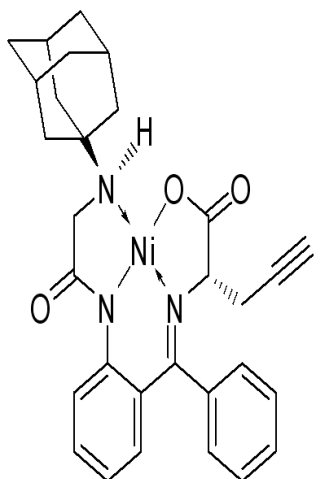

19c

8.3778  
8.3497

7.5560  
7.5211  
7.4066  
7.3778  
7.3488  
7.2981

7.0481

6.8264  
6.8168  
6.8078

4.2427  
4.2180  
4.1875  
4.1628  
4.0699  
4.0612  
4.0500  
4.0412  
3.7681  
3.5697  
3.5144

2.7867  
2.7097  
2.6619  
2.6441  
2.5554  
2.3267  
2.2613  
2.2407  
2.0875  
1.7341  
1.6363

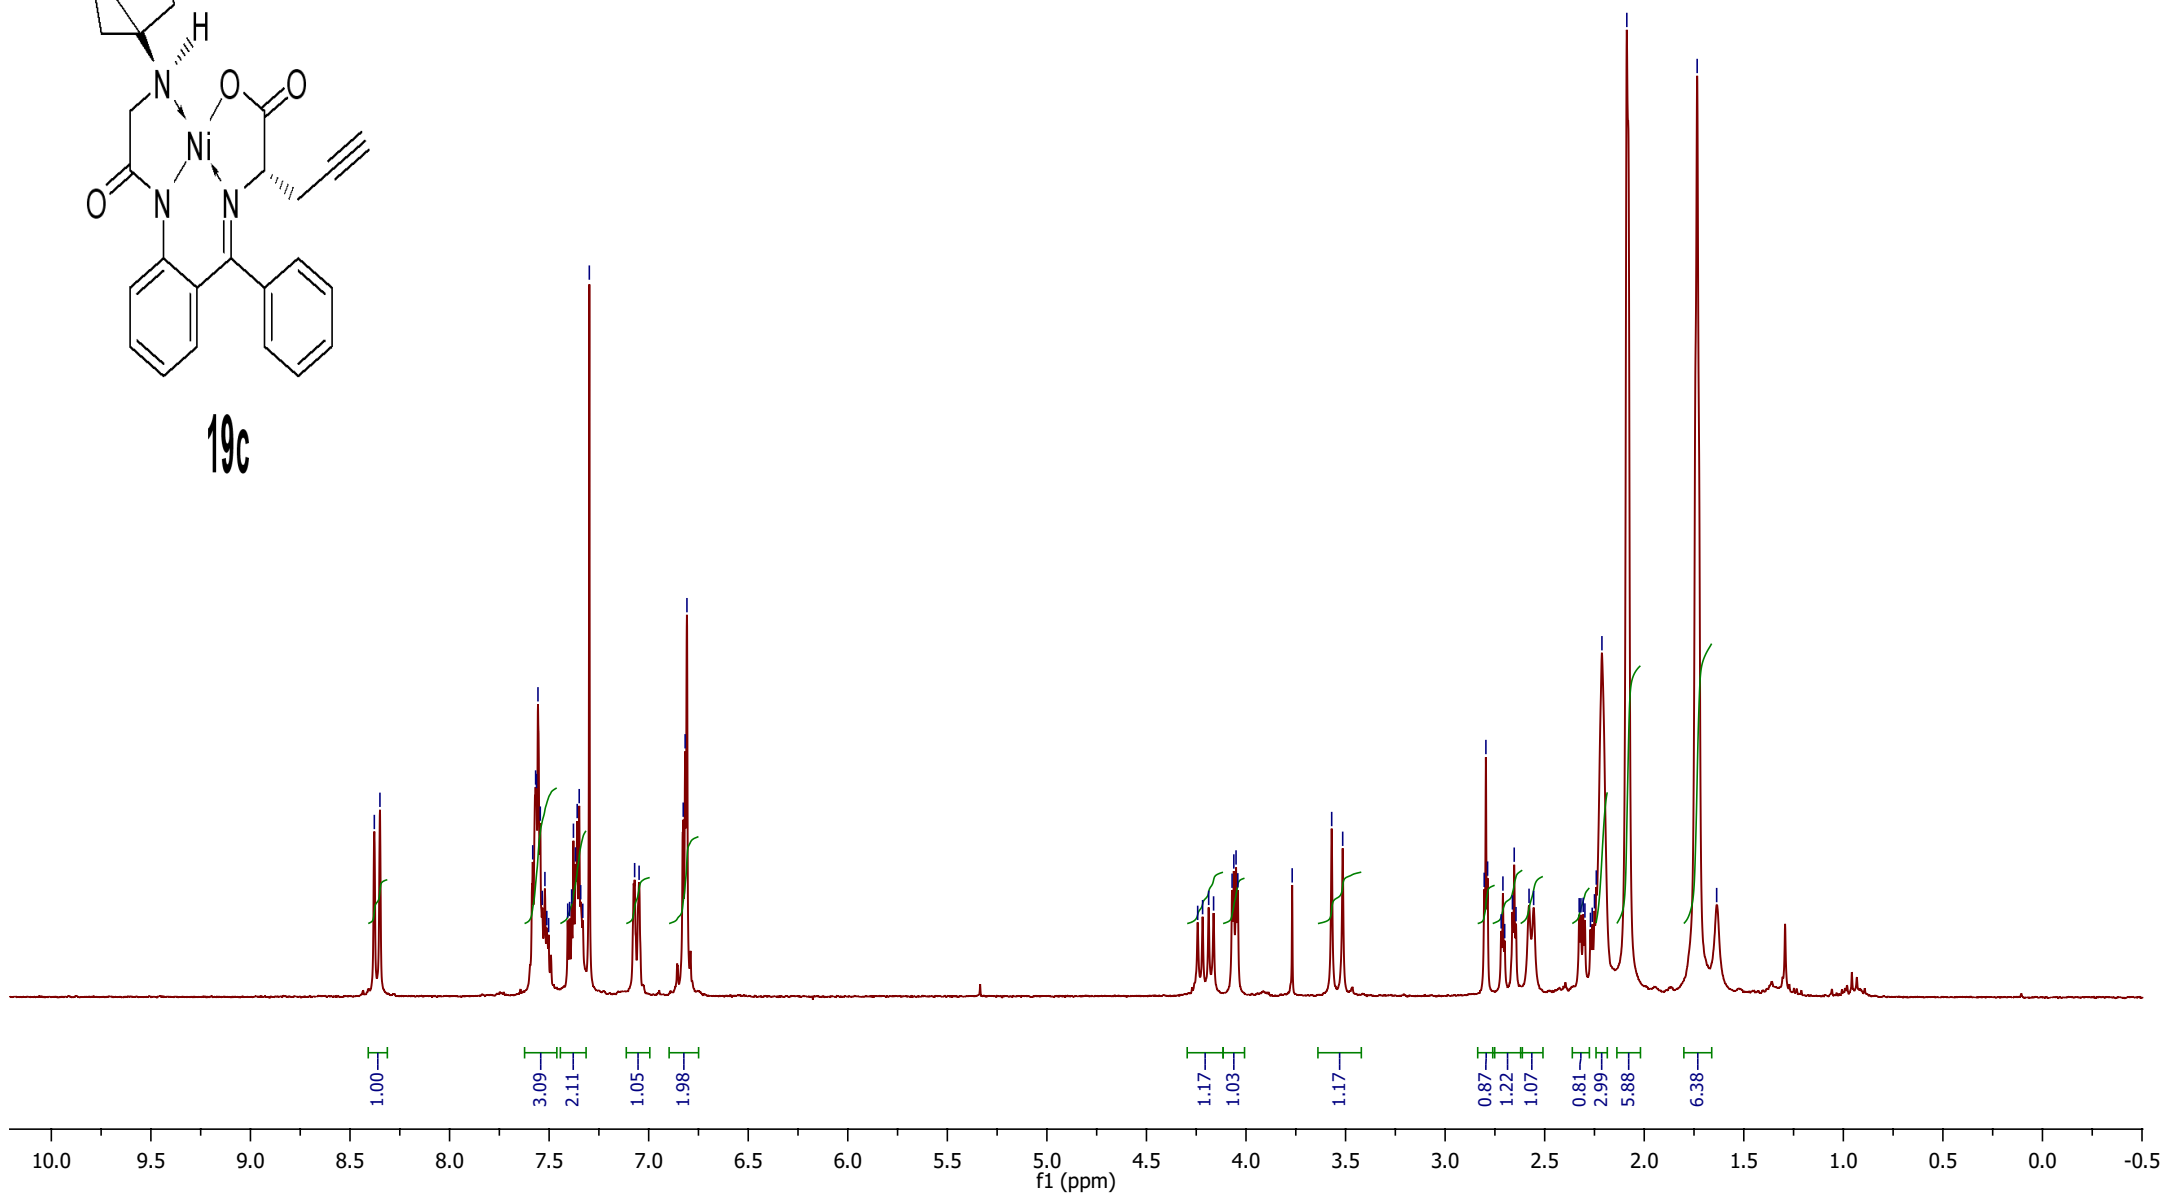

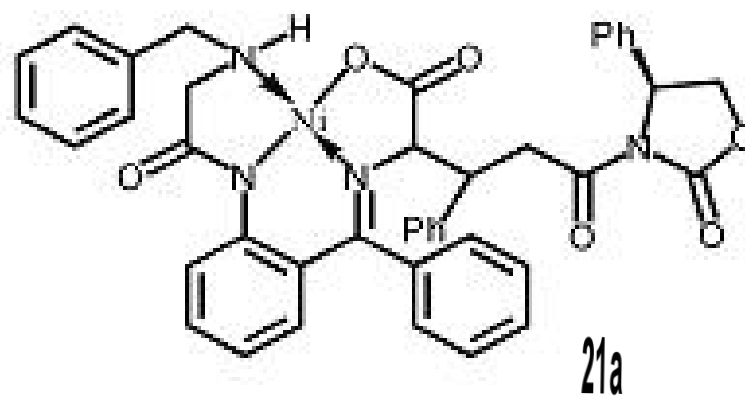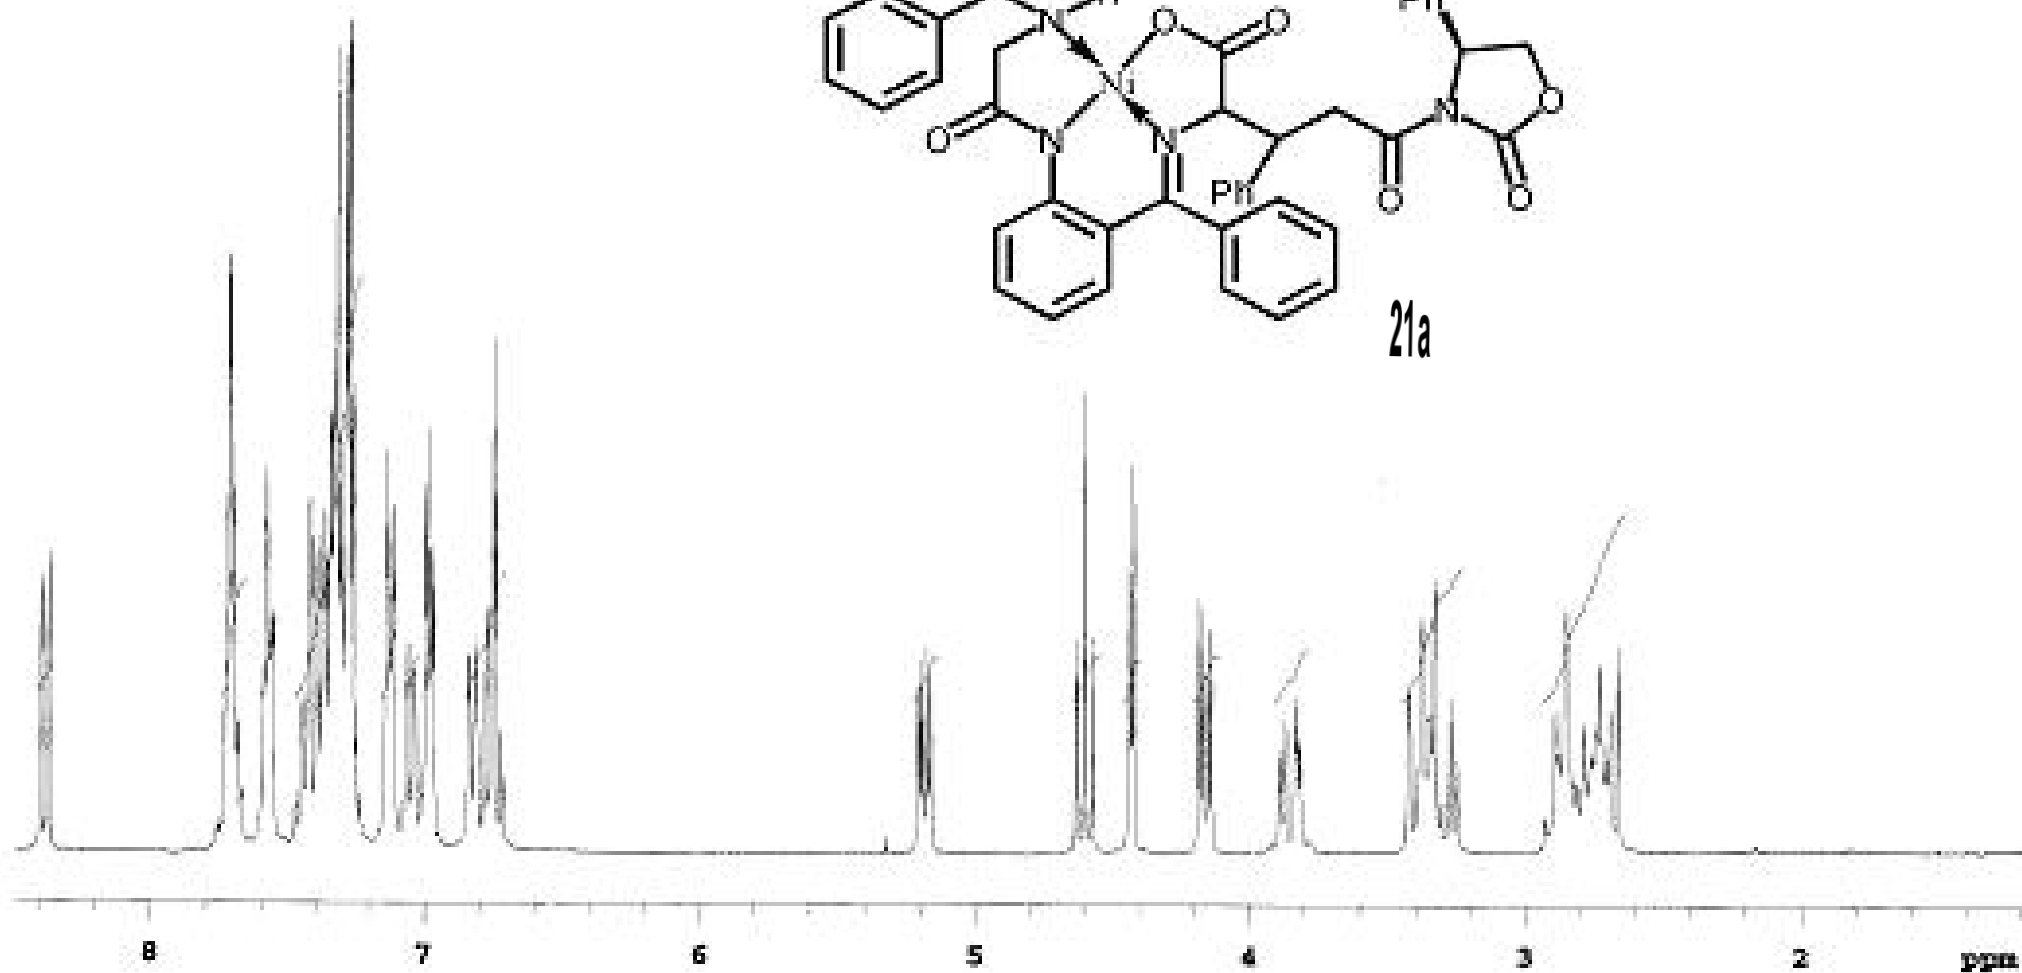

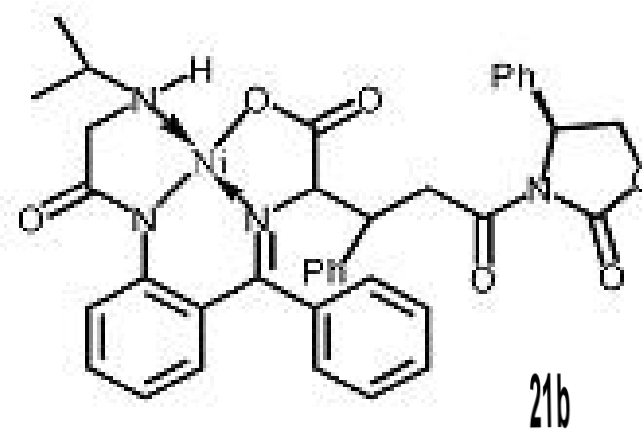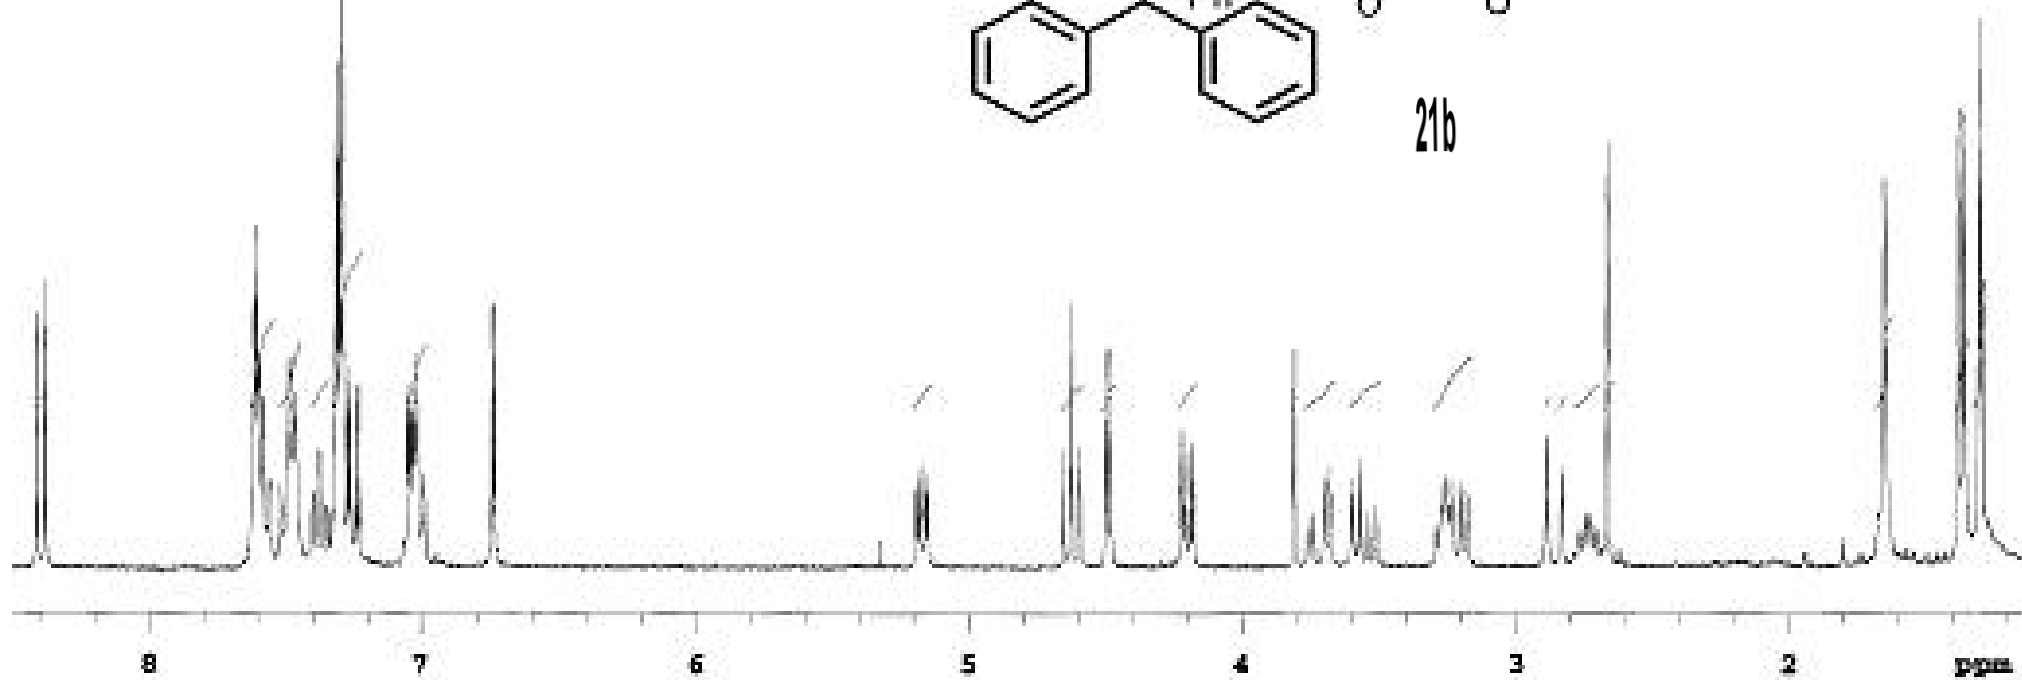

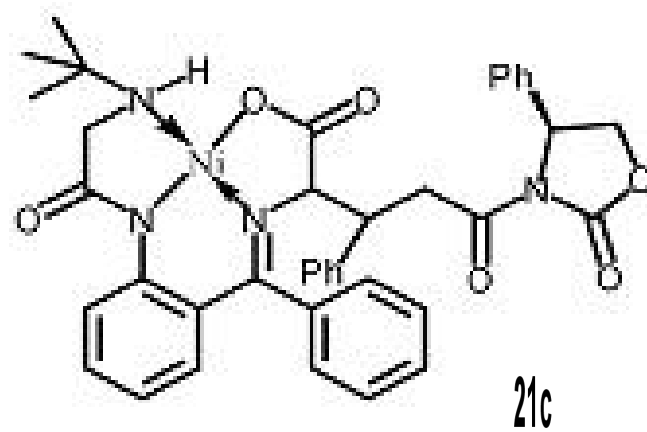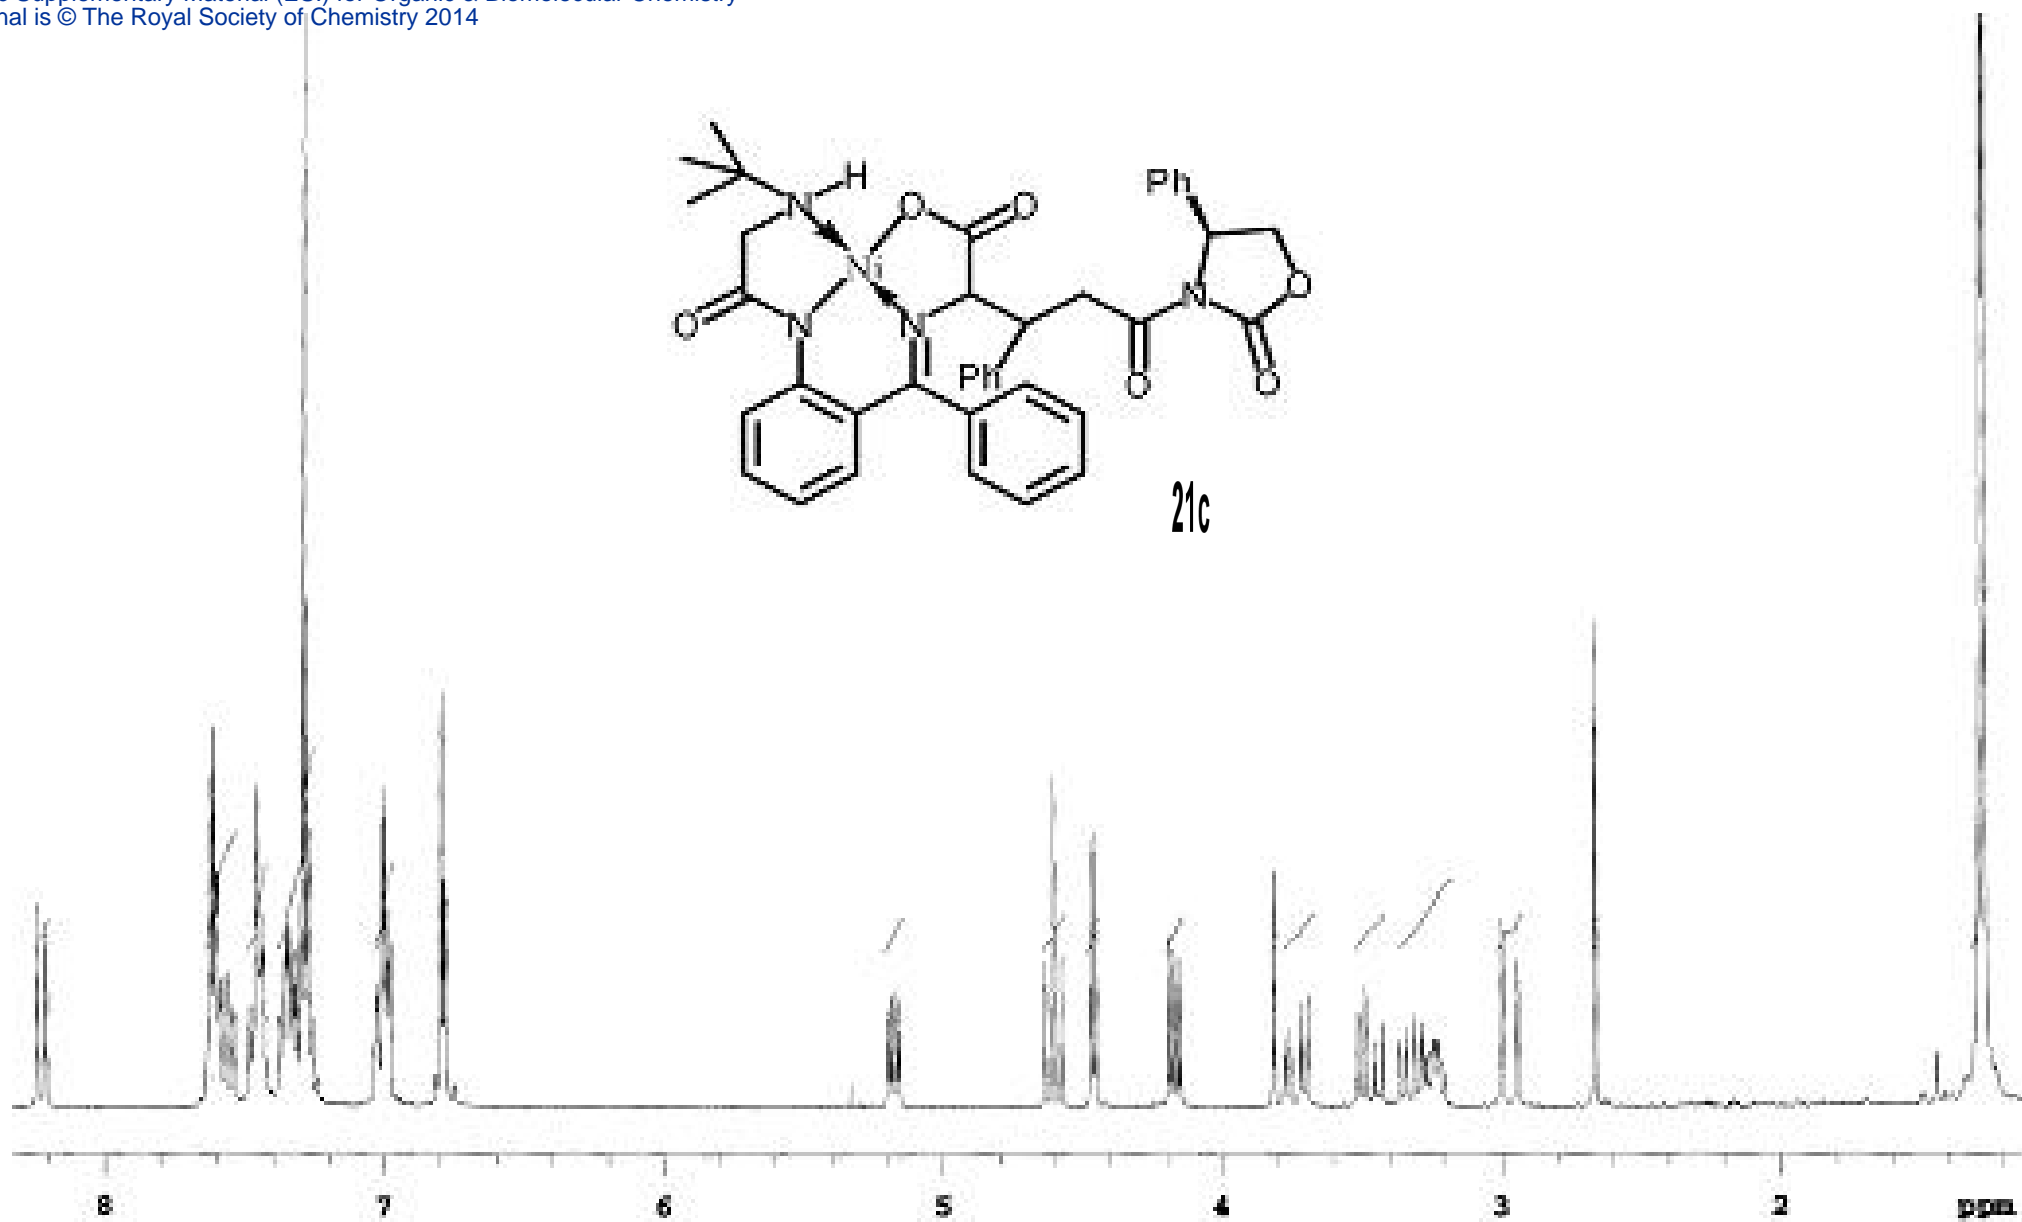



2483.5522  
2475.1619  
2287.6790  
2214.8635  
2200.1619  
2189.0202  
2178.4657  
2094.1251  
2048.2991  
2043.0628  
2040.4128  
2037.6456

1559.5534  
1555.9391  
1550.9423  
1547.3353  
1380.5338  
1371.8113  
1340.0343  
1335.3444

1251.8105  
1243.0038  
1128.7672  
1110.8593  
1044.5302  
990.7857  
983.6357  
974.2004  
967.1139  
933.7103  
917.1798

659.6684  
632.1476  
556.2503  
491.4952

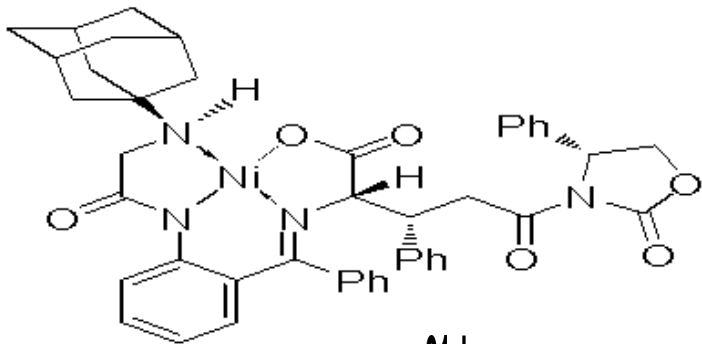

21d

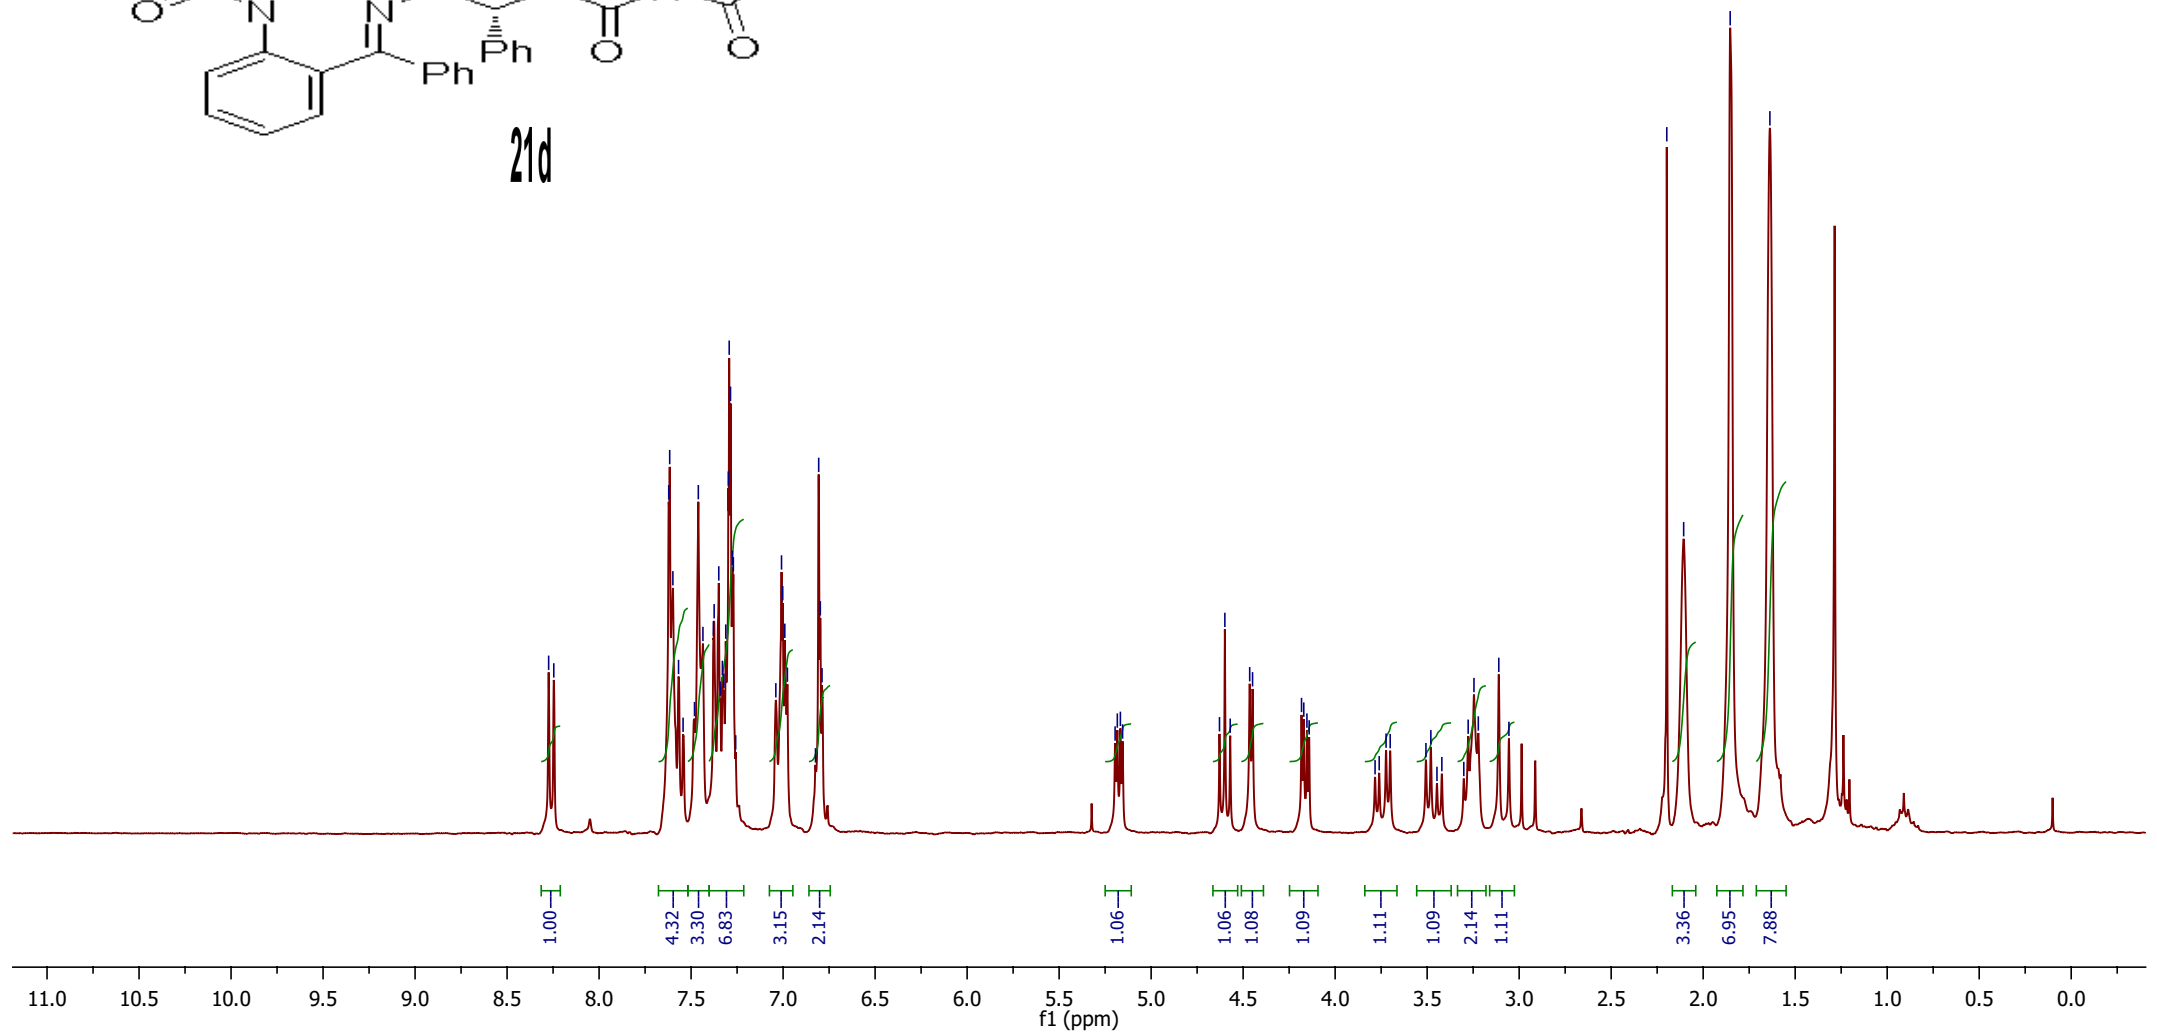

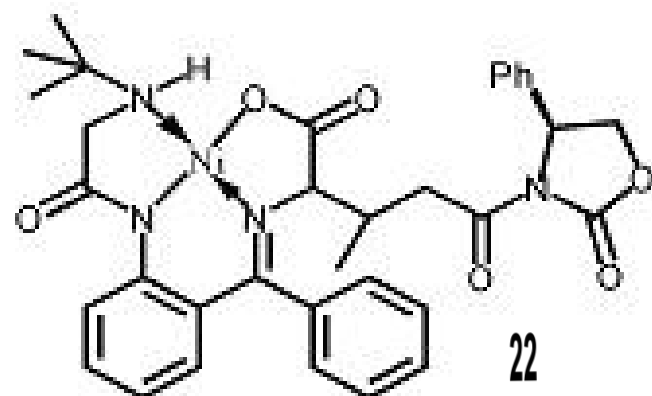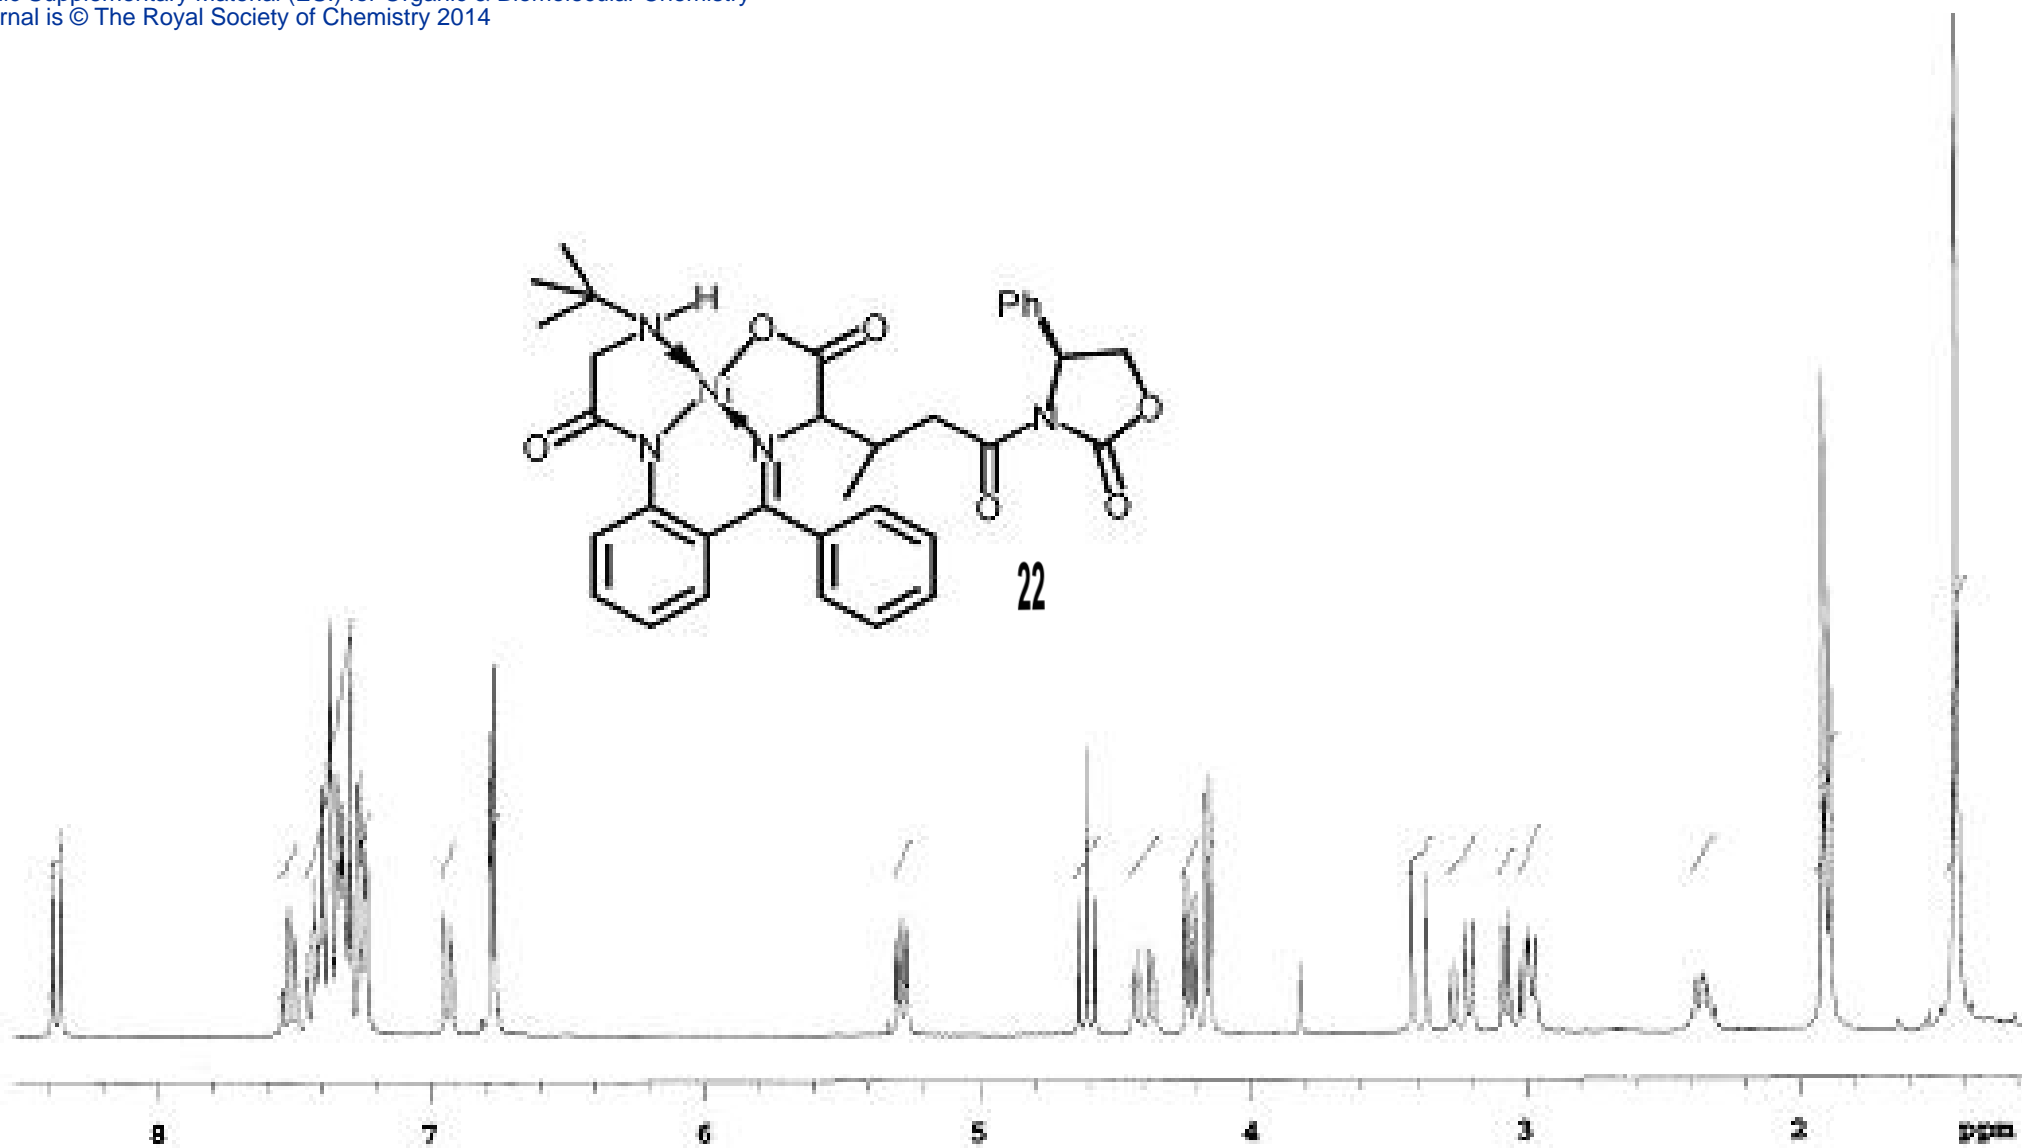

NHtbutylMichaelwithipropyl 10 1 "C:\Users\Ellis\My NMR Files\ICON-NMR Data"

PROTON

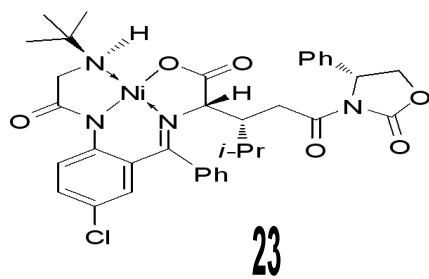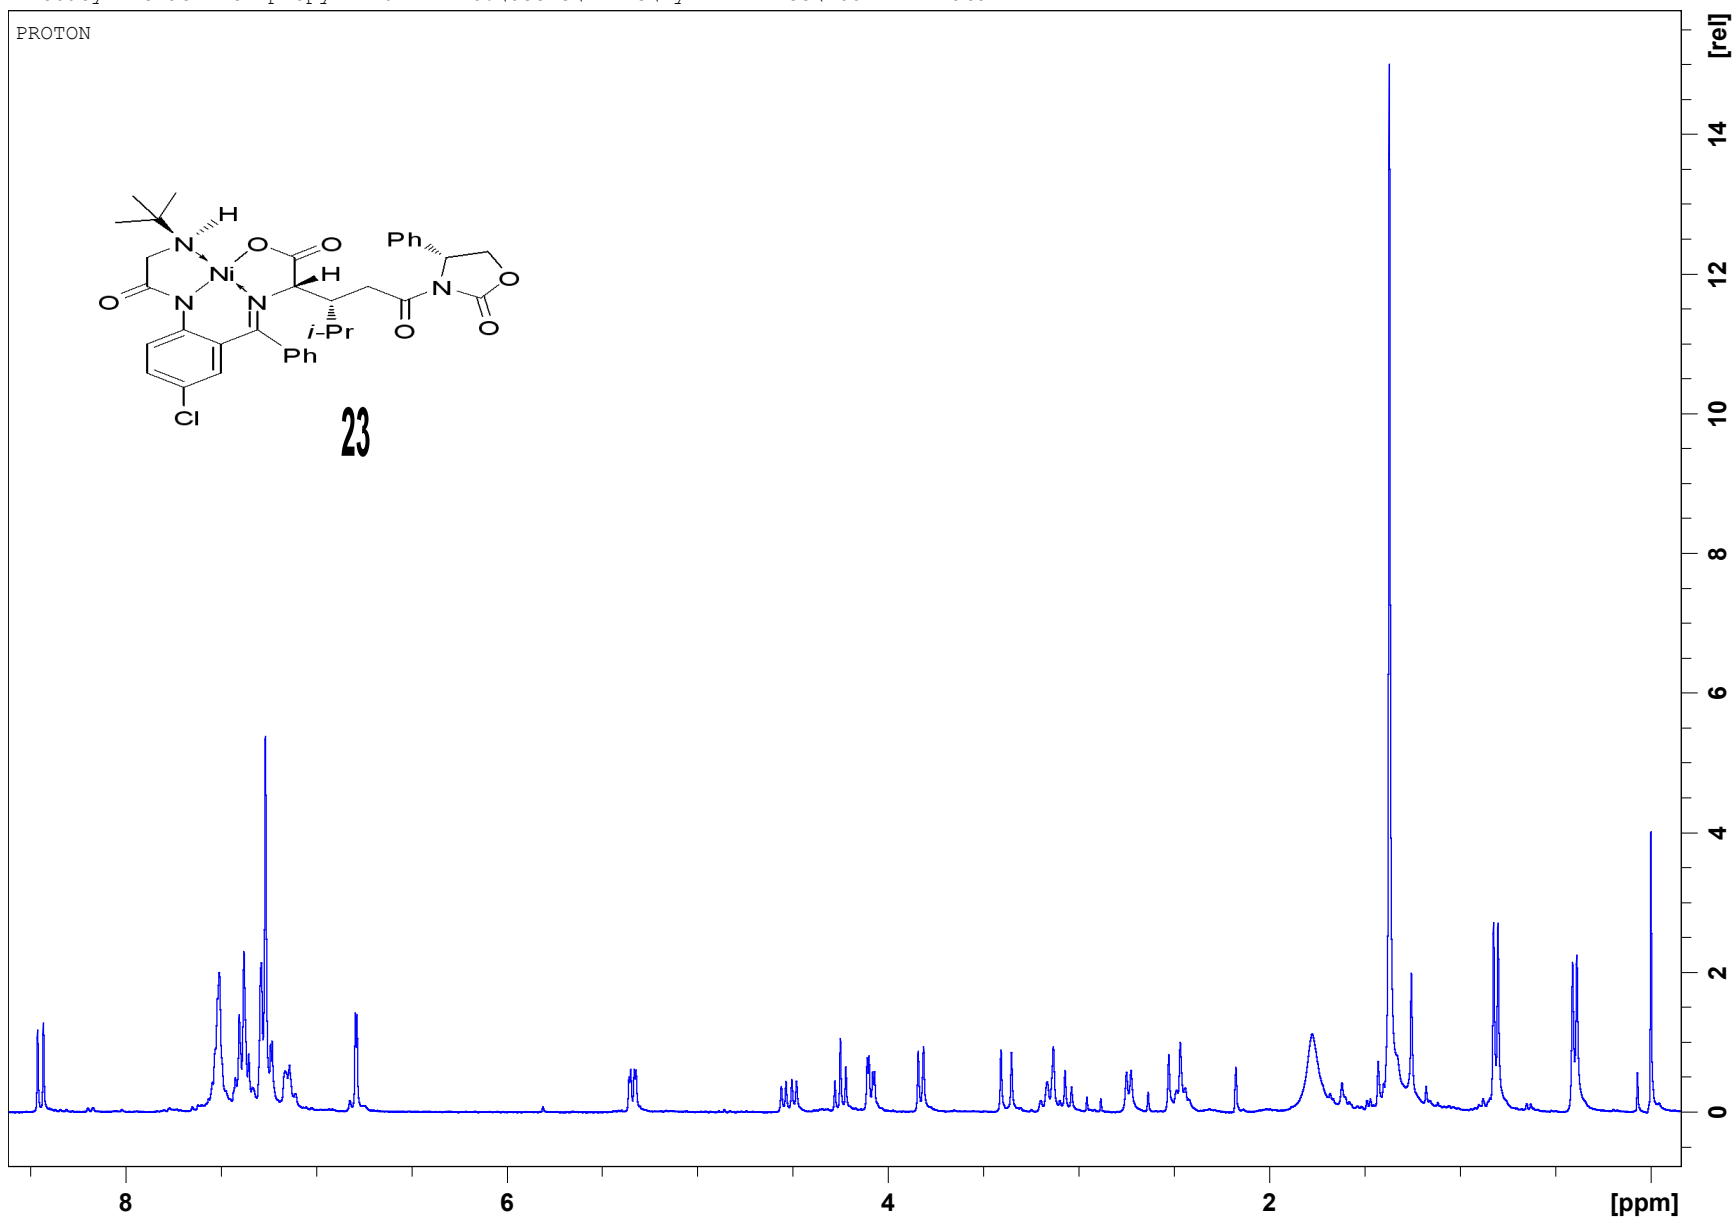

NHtbutylmichaelwithalphanaphthyl 10 1 "C:\Users\Ellis\My NMR Files\ICON-NMR Data"

PROTON

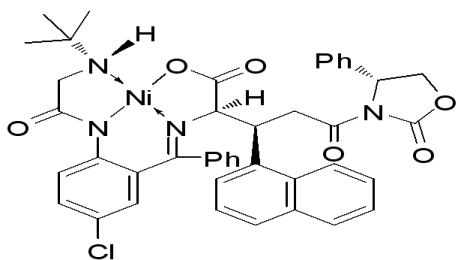

24a

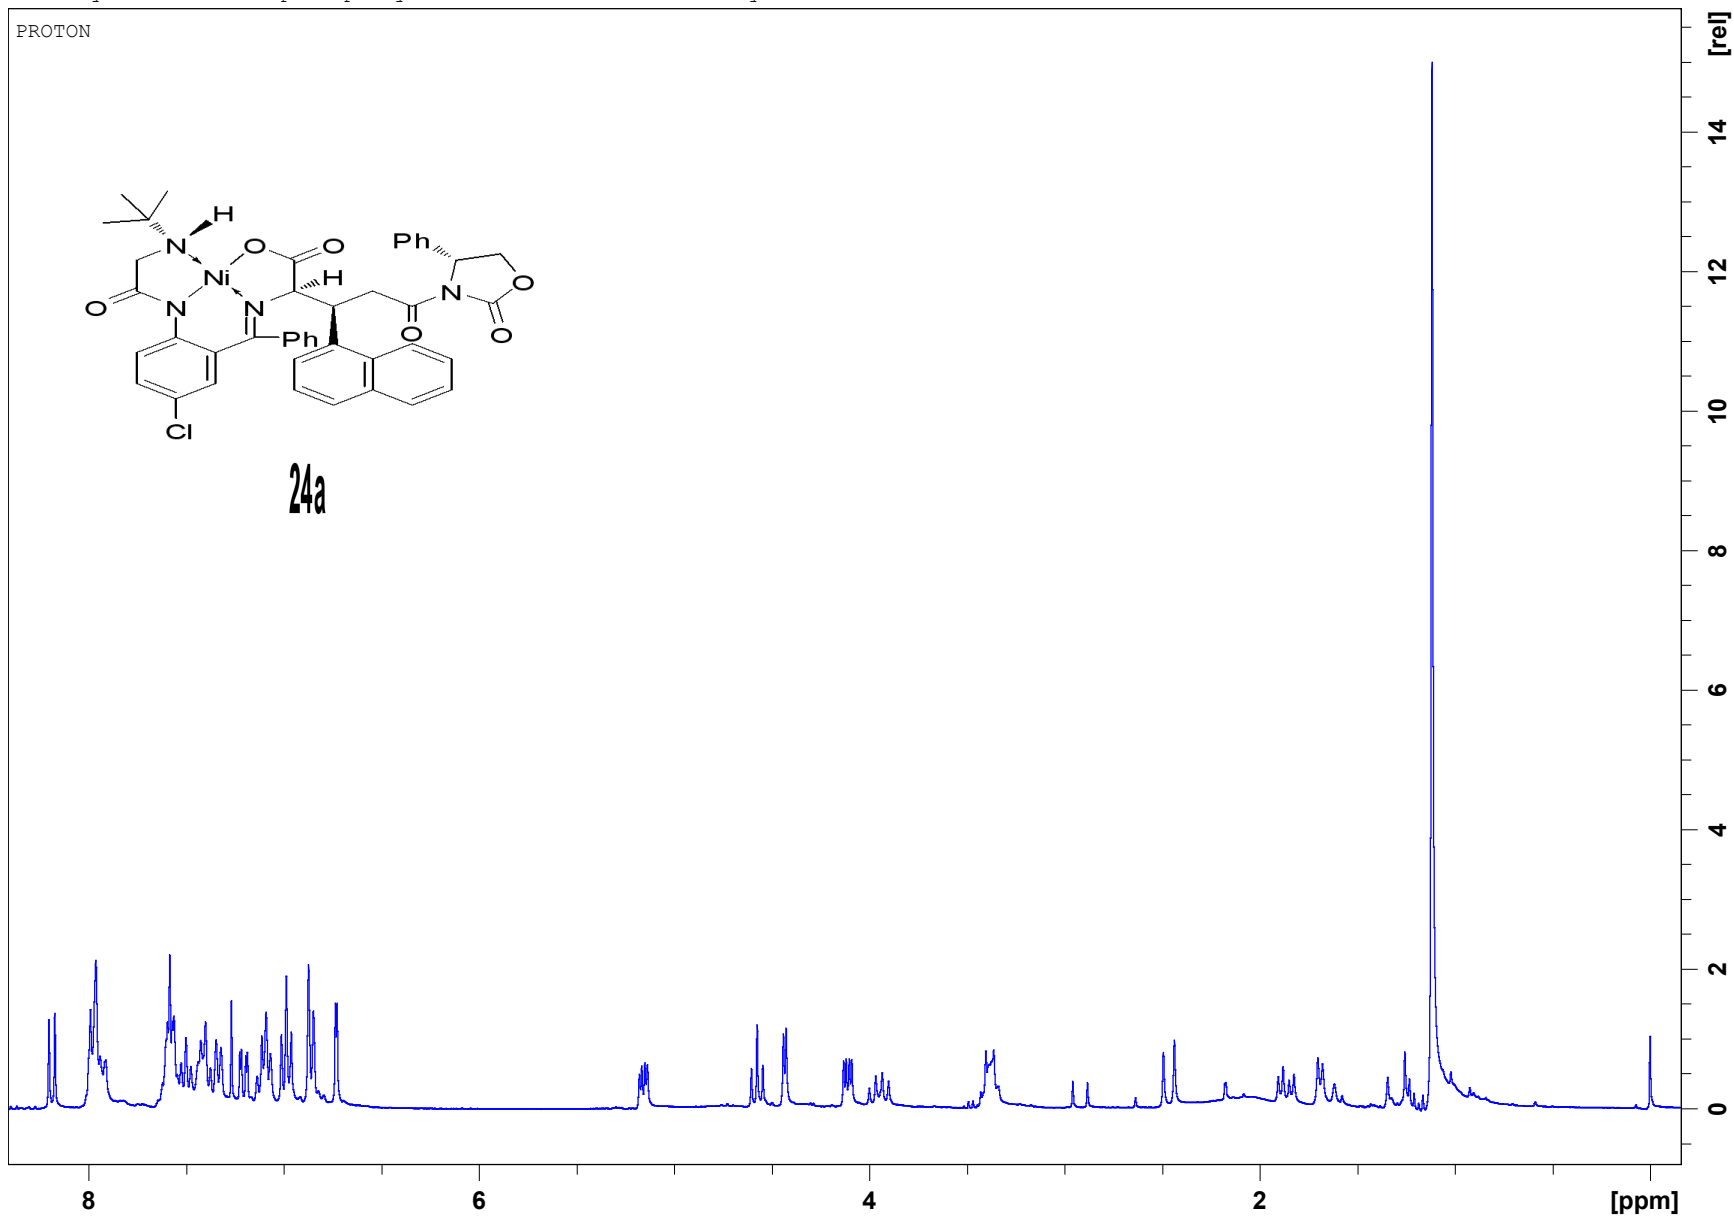

NHtButlymichaelwith4CF3Ph 10 1 "C:\Users\Hubin\My NMR Files\ICON-NMR Data"

PROTON

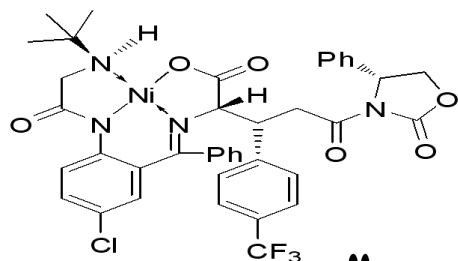

26a

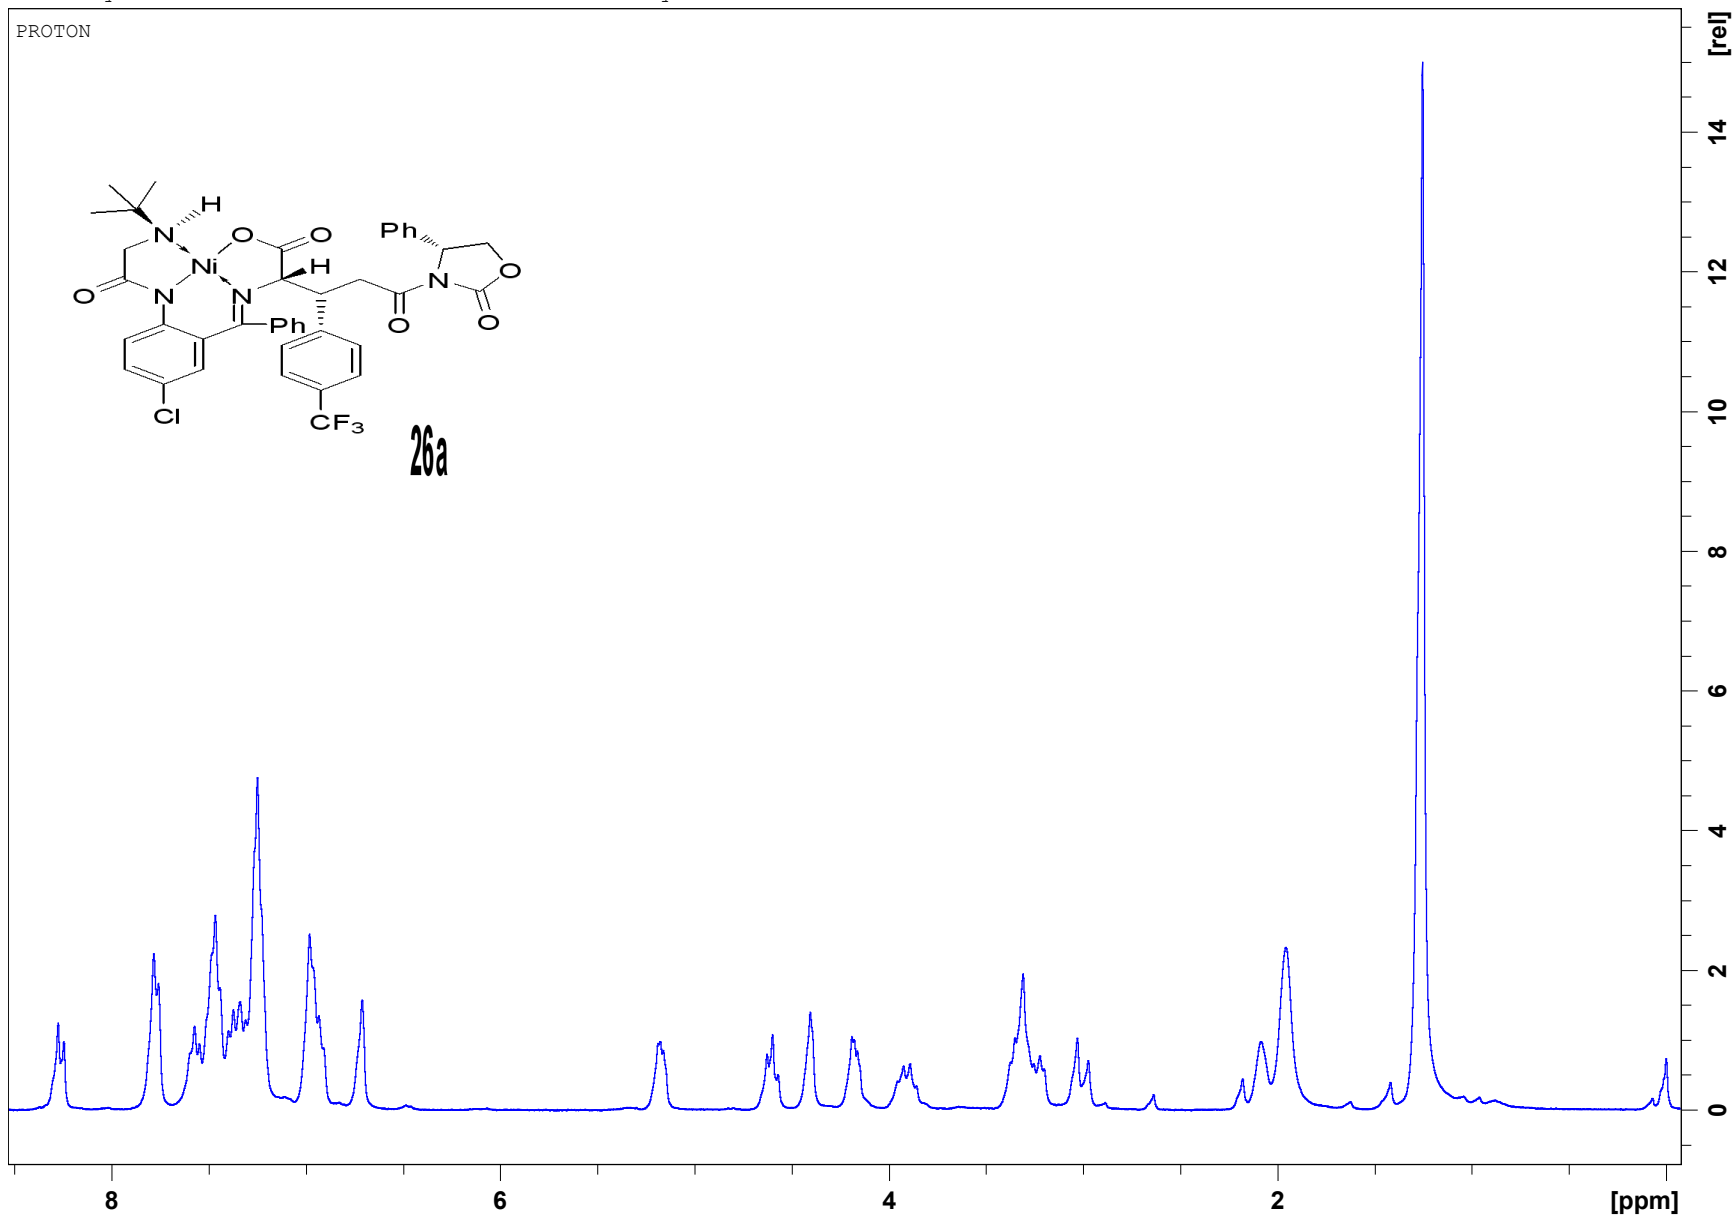

NHtbutylMichaelwith4OMePH 10 1 "C:\Users\Ellis\My NMR Files\ICON-NMR Data"

PROTON

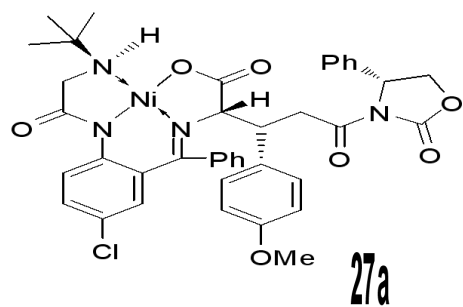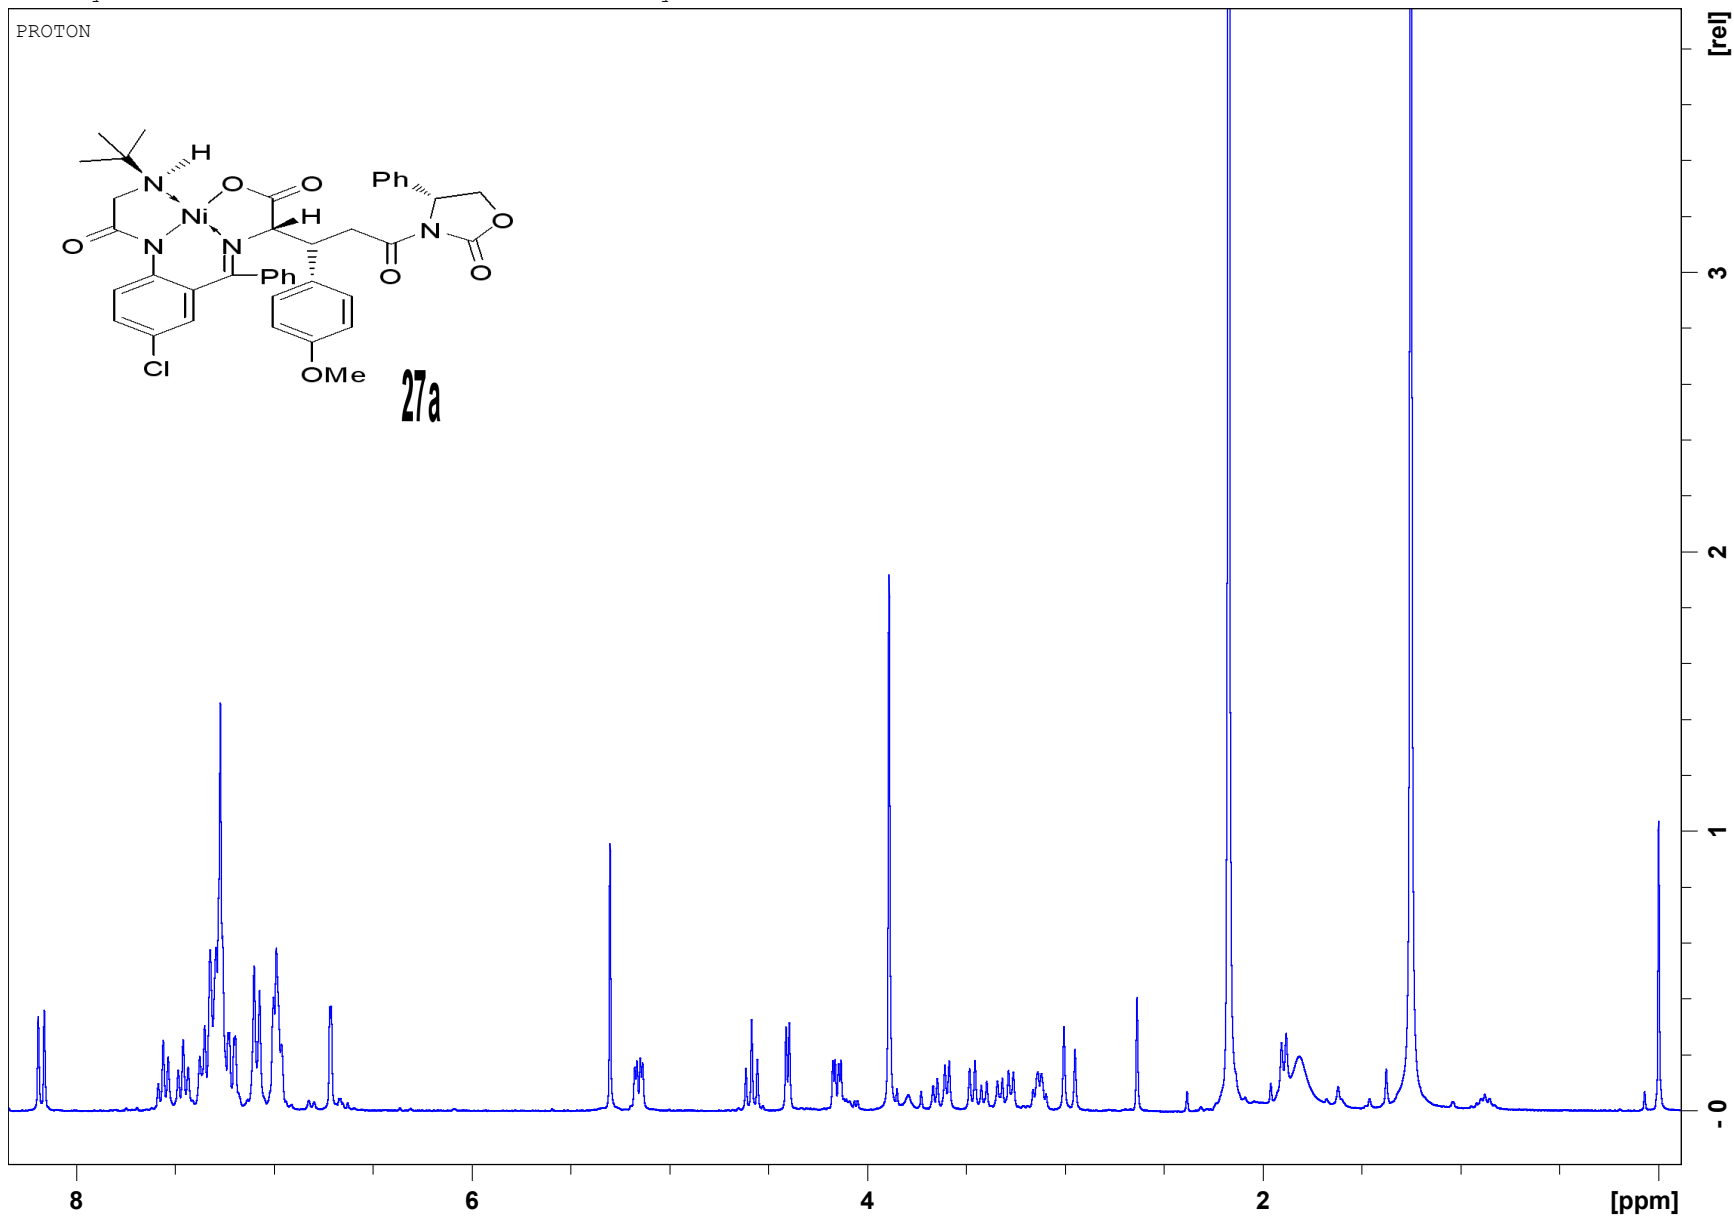

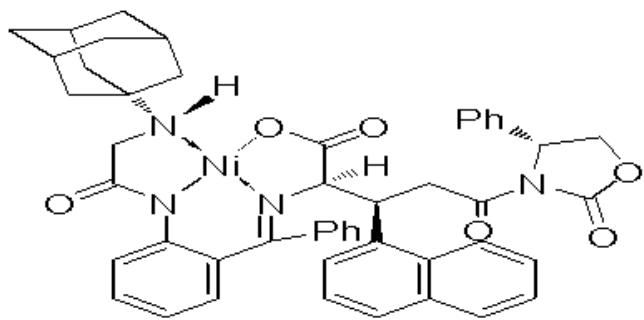

24b

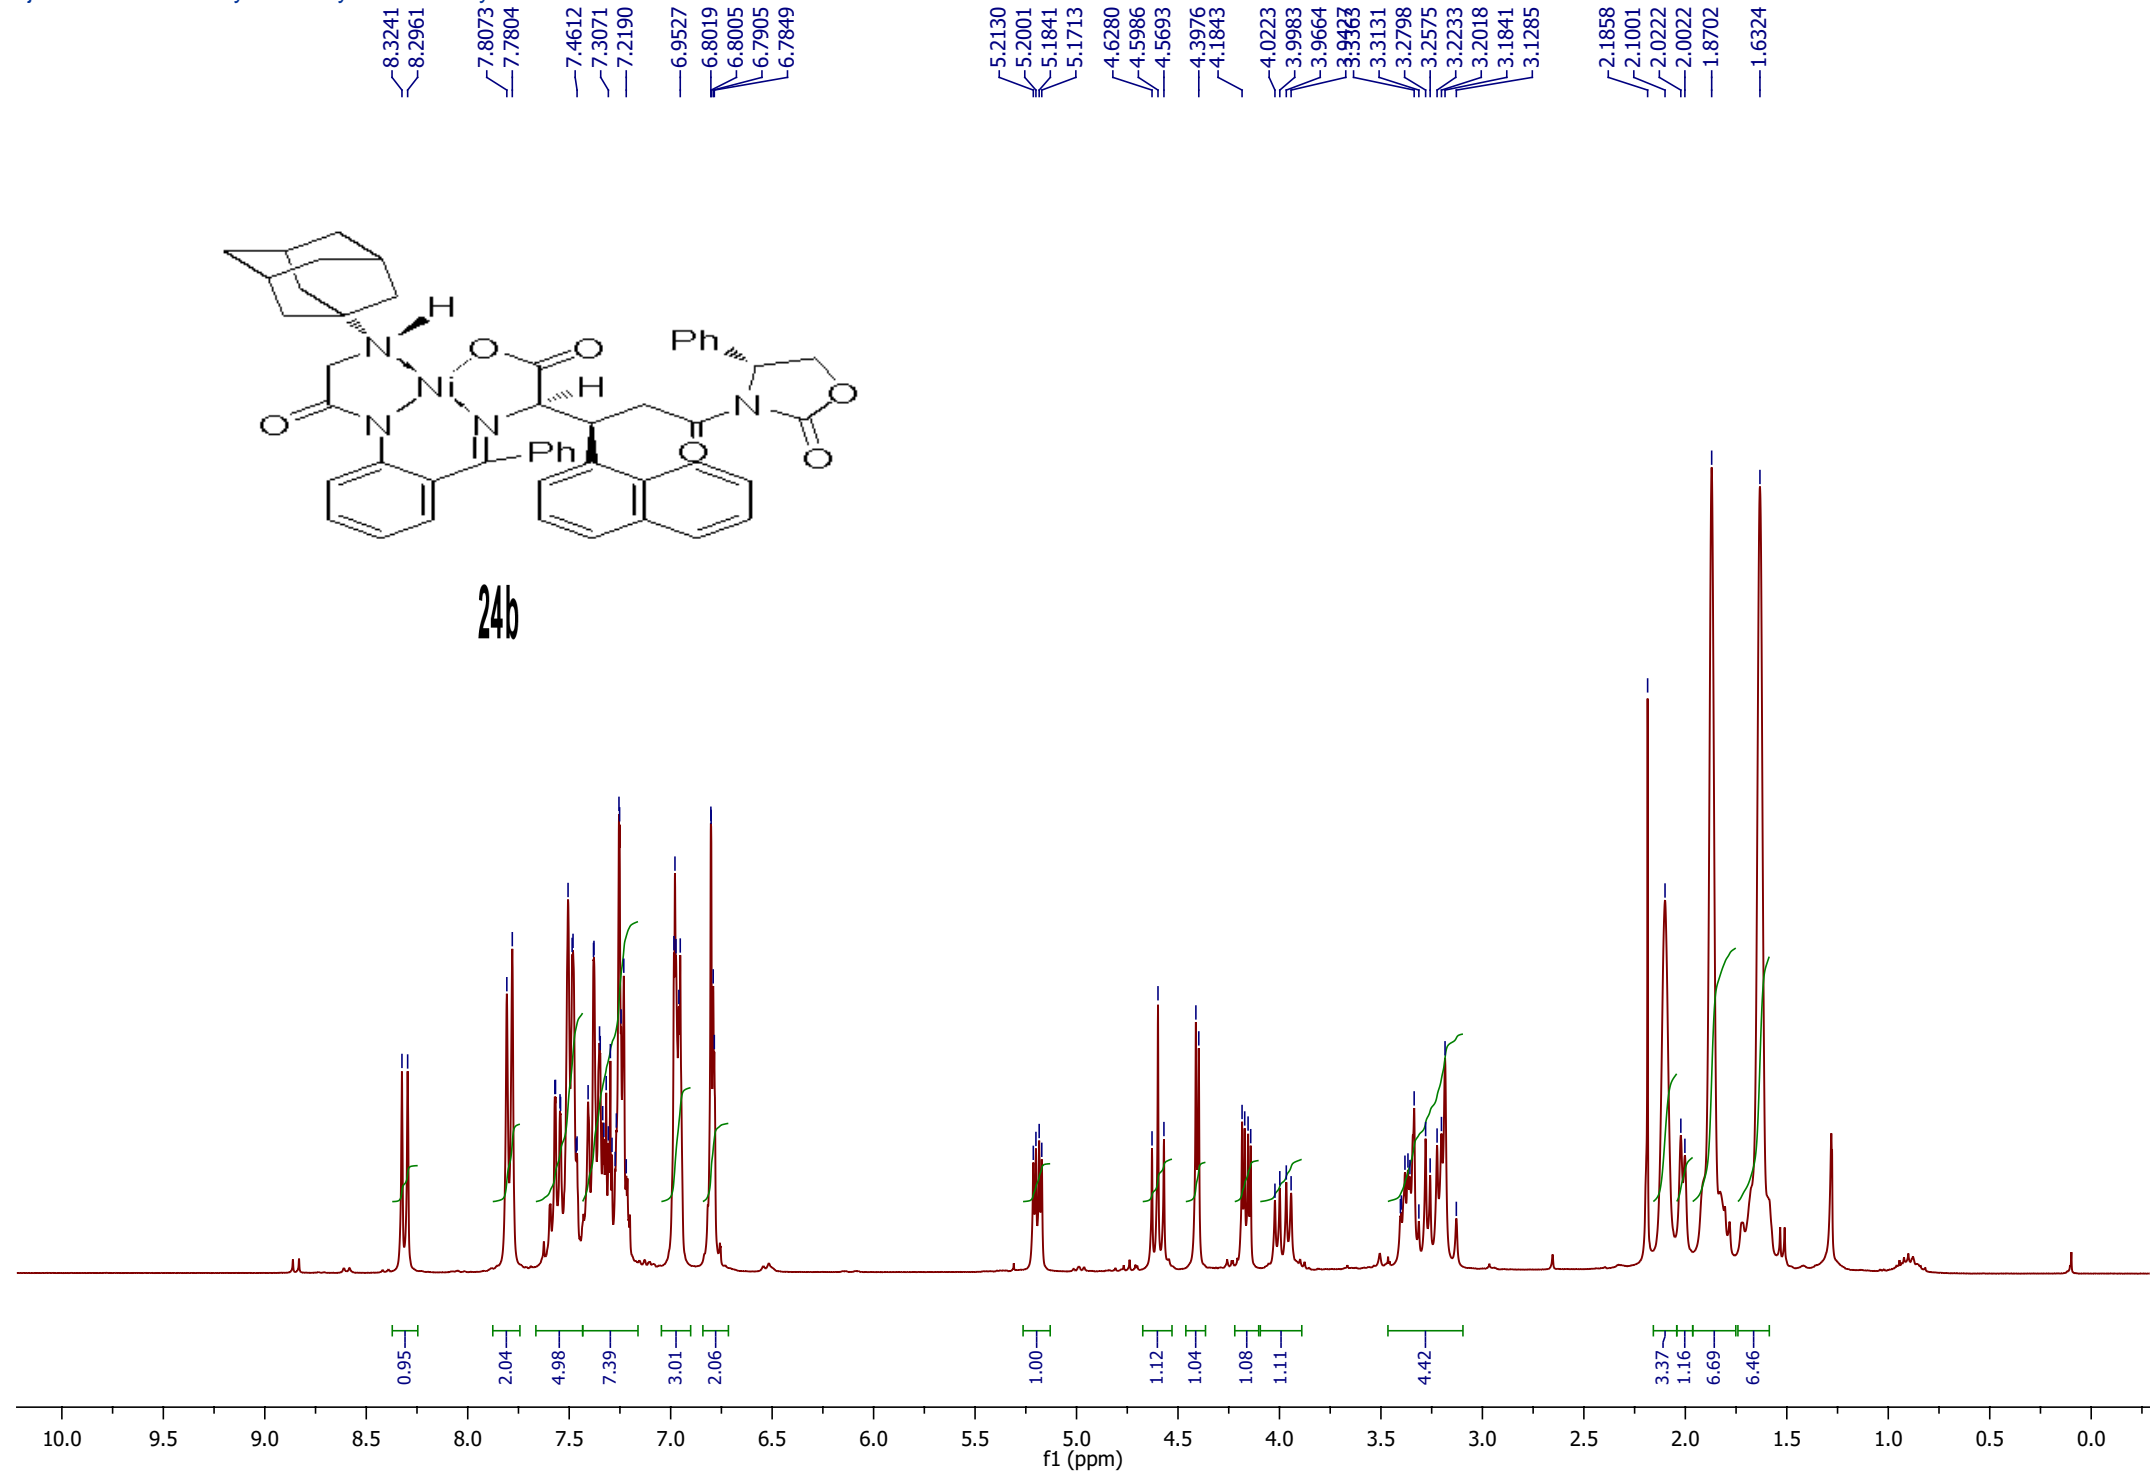

8.2727  
8.2445  
8.0161  
7.5878  
7.5421  
7.3881  
7.3630  
7.3258  
7.3041  
7.2827  
7.1555  
7.1243  
7.0303  
6.9797  
6.8677  
6.8445  
6.8163  
6.7630

5.2006  
5.1881  
5.1719  
5.1594  
4.6142  
4.5850  
4.5559  
4.4679  
4.4542  
4.1304  
4.1011  
4.0439  
3.9916  
3.4825  
3.4584  
3.4294  
3.3800  
3.3555

2.6596  
2.6039

1.8925  
1.8436  
1.7263  
1.5789

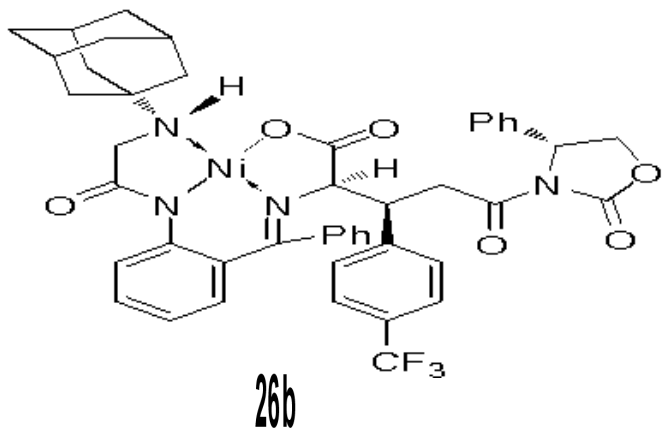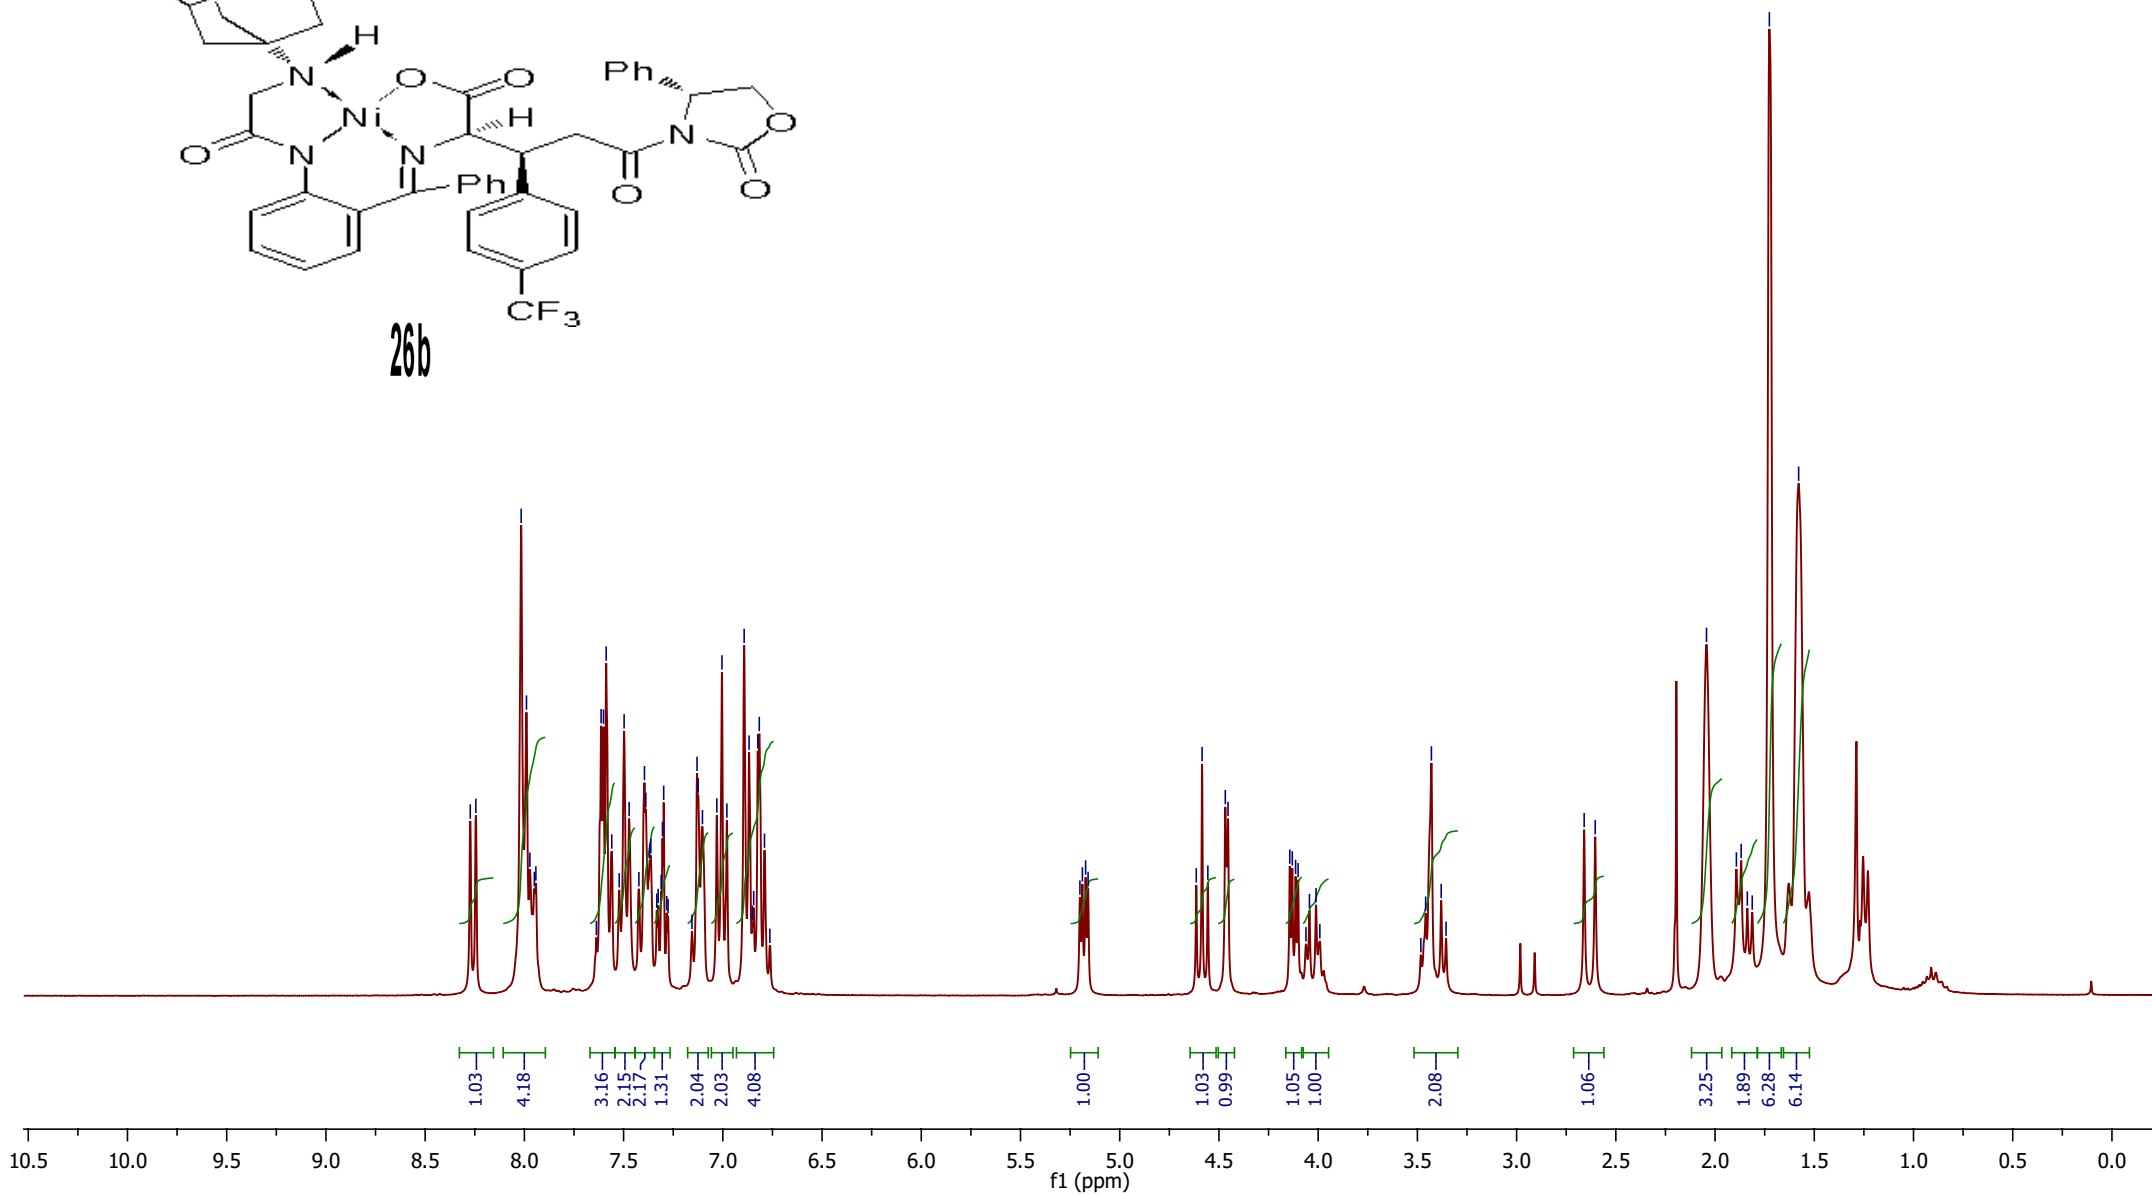



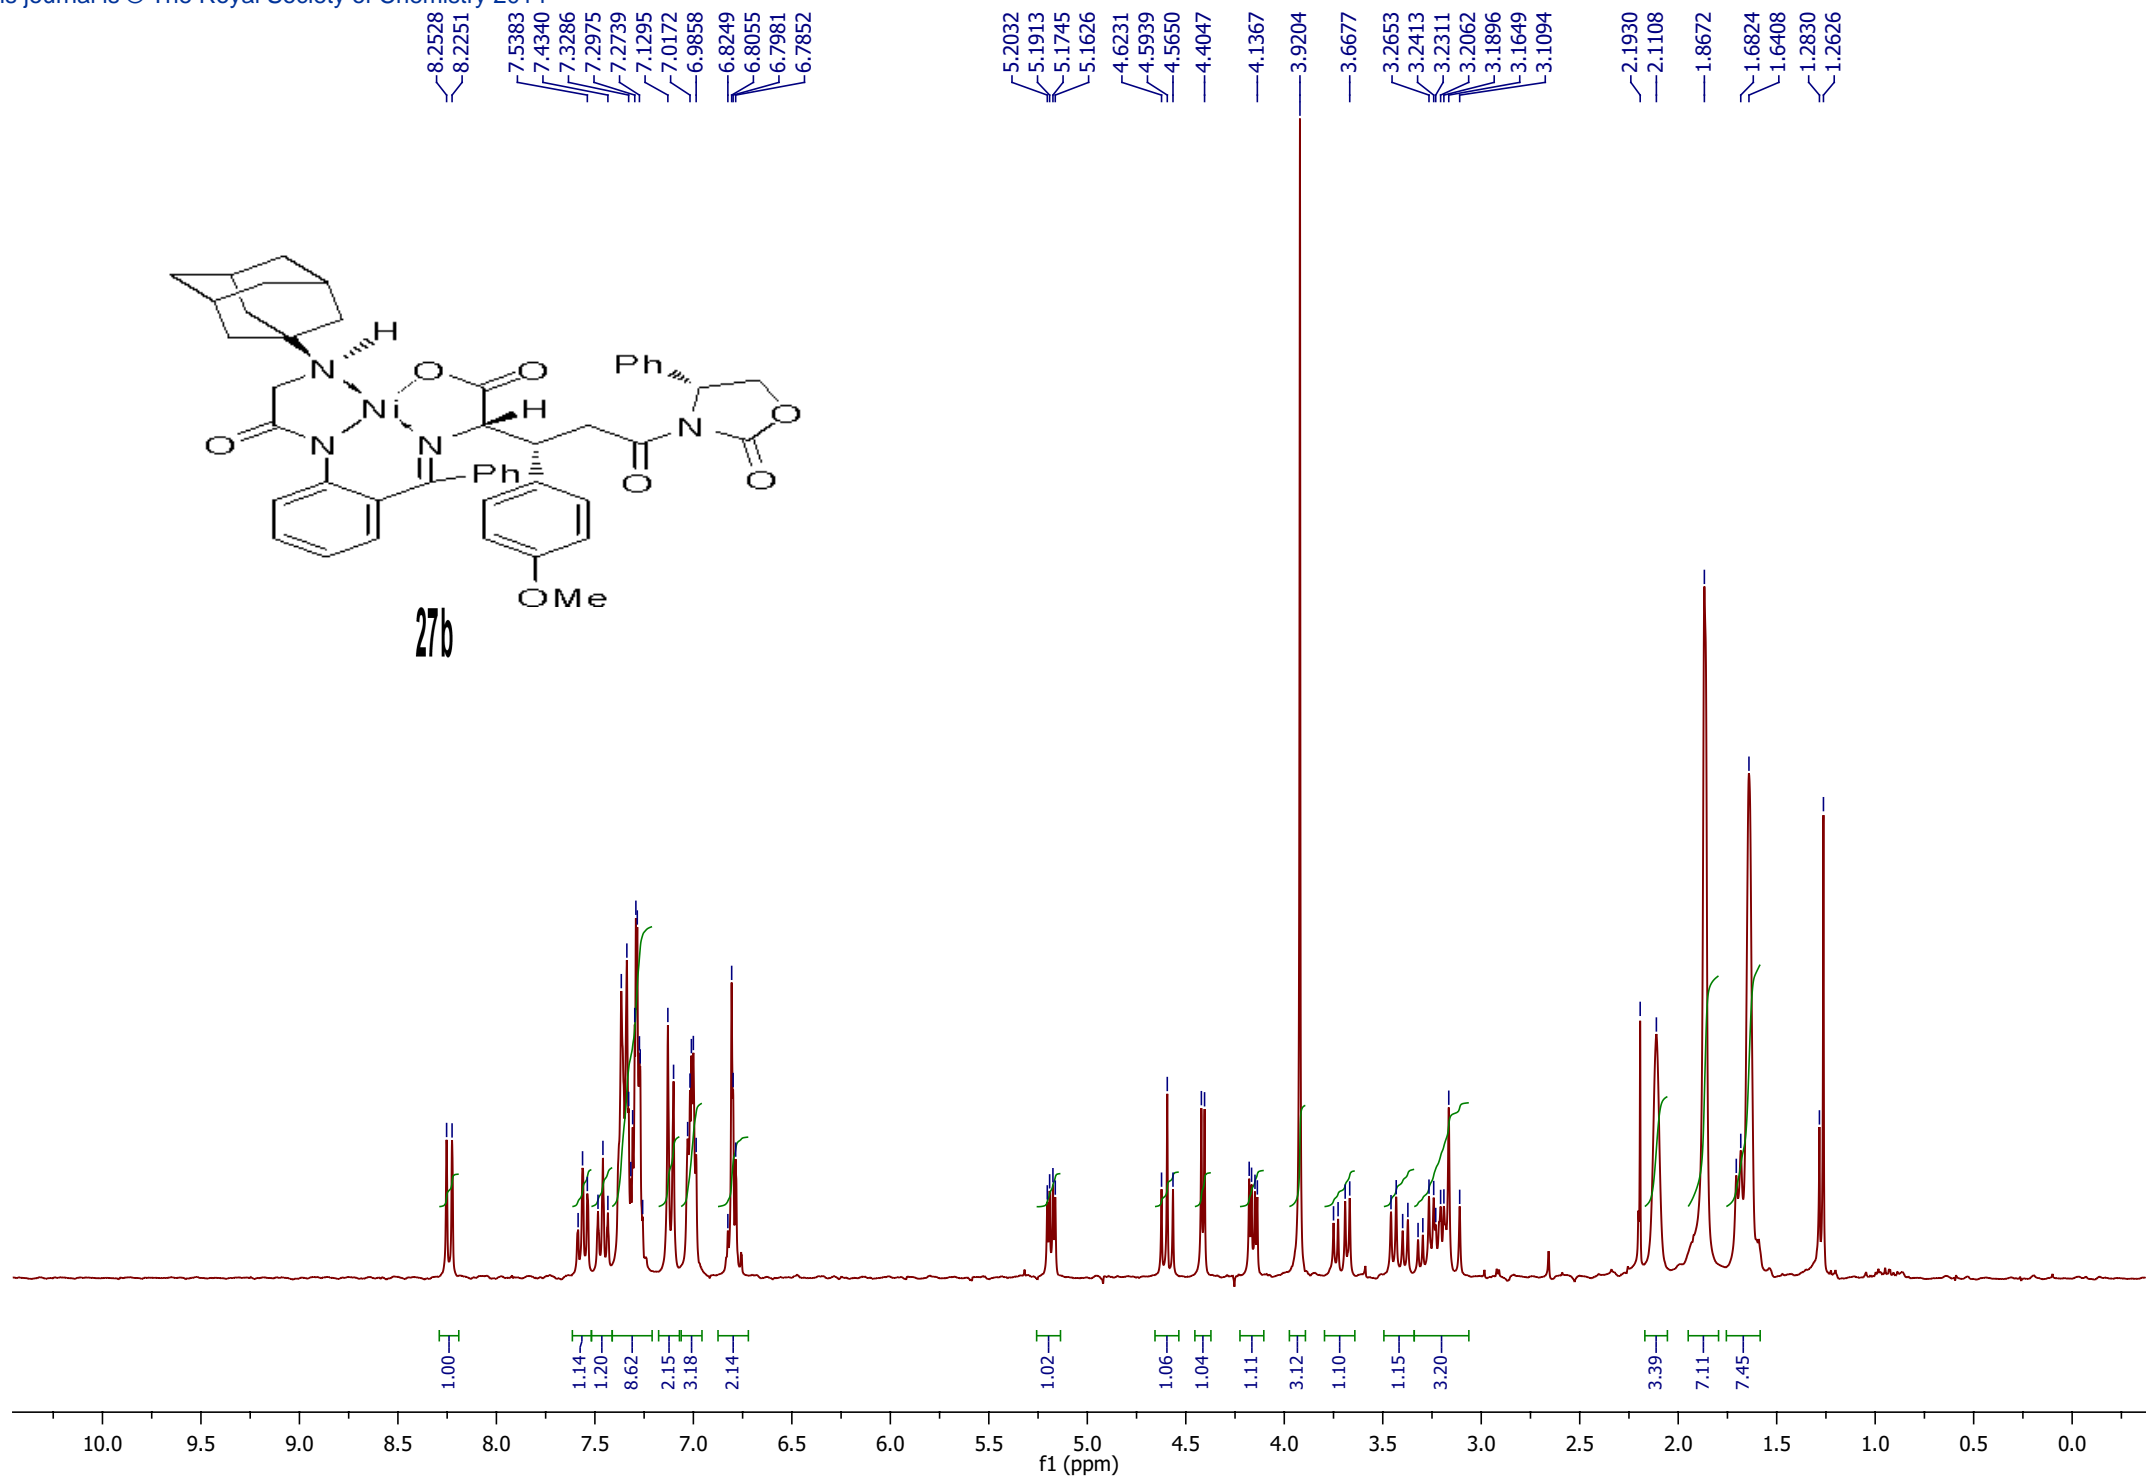

Supplement: c3ob41959b.pdf [file c3ob41959b.pdf]
